# Supplementary material for: Effect of Water-Saving Society Policy on Water Consumption in the Cities of China: A Propensity Score Matching Analysis
Source: Int J Environ Res Public Health. 2020 Nov 5;17(21):8171. doi: 10.3390/ijerph17218171 (PMC7663824; doi:10.3390/ijerph17218171)
Supplement: Supplementary file 1 [file ijerph-17-08171-s001.xlsx]

## Sheet: Table S1. data
id	city	year	y	rank1	rank2	rank3	S	x1	x2	x3	x4	x5
1	Beijing	2005	0	2	1	3	21.396	911.22	46878	0.421461	62.4	130.341
2	Tianjin	2005	1	2	1	3	20.0519	1037.48	39695	1.33199	62.61	88.6642
3	Shijiazhuag	2005	0	2	1	3	36.544	4915.57	32994	0.732259	36.6	118.724
4	Tangshan	2005	0	2	1	3	19.8359	2430.49	36064	1.9402	81.05	71.2929
5	Qinhuangdao	2005	0	2	2	2	35.2907	2138.57	40029	0.604048	86.43	139.701
6	Handan	2005	0	2	2	3	63.4572	3245.39	22135	2.26418	65.37	139.595
7	Xingtai	2005	0	2	2	2	56.6572	4384.09	23091	2.20976	68.85	130.828
8	Baoding	2005	0	2	2	3	39.8757	3227.88	23067	0.827779	70.97	91.4408
9	Zhangjiakou	2005	0	2	2	2	59.6215	1056.65	20807	1.57714	52.9	123.712
10	Cangshou	2005	0	2	2	1	27.0454	2726.23	29439	1.32306	60	78.7933
11	Langfang	2005	1	2	2	2	24.9782	2618.15	17647	1.002	69.02	44.0549
12	Hengshui	2005	0	2	2	1	23.2849	5653.75	23772	1.54667	50.36	54.8751
13	Taiyuan	2005	0	2	1	3	33.2987	1801.64	29802	0.816431	63	98.5211
14	Datong	2005	0	2	2	3	39.865	691.44	19139	1.34122	69.2	82.9509
15	Yangquan	2005	0	2	2	2	35.1734	956.85	20361	1.28647	64.5	74.7258
16	Changzhi	2005	0	2	2	2	53.81	2026.35	23312	0.886086	47.78	125.222
17	Jincheng	2005	0	2	2	1	17.3773	2068.71	27987	2.33793	40	63.9921
18	Shuozhou	2005	0	2	2	2	98.8976	145.96	16452	2.71629	19	162.707
19	Jinzhong	2005	0	2	2	2	41.1655	415.41	11995	0.801347	68	49.5042
20	Linfen	2005	0	2	2	2	26.9315	594.3	15202	0.976569	25.56	39.2021
21	Huhehaote	2005	0	2	1	3	22.9881	533.69	34441	0.419776	61.92	111.321
22	Baotou	2005	0	1	1	3	28.4707	457.12	53050	1.14714	60.8	150.892
23	Wuhai	2005	0	1	2	1	73.389	245.78	27187	1.78145	52.8	213.825
24	Chifeng	2005	0	2	2	3	38.2794	161.94	13063	1.09713	61.35	50.5981
25	Tongliao	2005	0	2	2	2	62.6931	250.68	16216	1.26852	53.05	93.1818
26	E'erduosi	2005	0	1	2	1	8.73358	91.15	40742	0.660168	50.05	51.6912
27	Hulunbei'er	2005	0	2	2	1	43.6522	178.13	17694	0.696151	41.95	77.5049
28	Bayanzhuo'er	2005	0	1	2	2	9.64207	226.25	13583	0.816173	100	12.9741
29	Wulanchabu	2005	0	1	2	1	58.0092	2550	9000	0.593272	88	79.773
30	Shenyang	2005	0	2	1	3	30.8063	1418.86	36779	0.791651	71	112.898
31	Dalian	2005	1	2	1	3	22.5518	1164.02	57184	0.834412	73	128.281
32	Anshan	2005	0	2	1	3	69.5811	2342.47	45935	1.6376	6.46	319.252
33	Fushun	2005	0	3	2	3	46.895	1969.61	22698	1.54477	43.8	106.386
34	Benxi	2005	0	3	2	2	115.364	735.47	26306	1.78455	50.88	315.499
35	Jinzhou	2005	0	2	2	2	82.5066	2008.03	22612	0.851225	28.79	186.054
36	Liaoyang	2005	0	2	2	2	90.2193	1246.17	18135	2.13023	74	226.059
37	Panjin	2005	0	2	2	2	23.0079	2169.17	60750	5.21142	100	139.168
38	Tieling	2005	0	2	2	1	64.9479	688.24	15674	1.79901	56.23	101.776
39	Huludao	2005	0	2	2	2	25.246	409.87	19775	1.93814	94.21	52.2002
40	Changchun	2005	0	2	1	3	23.5459	935.94	36817	1.22359	45.82	83.7999
41	Jilin	2005	0	3	2	3	244.635	494.69	18916	1.27902	16.67	483.549
42	Siping	2005	0	2	2	2	27.4068	1474.94	17097	0.943272	83.69	40.3298
43	Liaoyuan	2005	0	2	2	1	26.5837	2323.3	17902	1.30139	67.76	44.2959
44	Ha'erbin	2005	0	3	1	3	27.689	933.24	30619	0.711492	29.7	84.3067
45	Qiqiha'er	2005	0	2	2	3	59.3735	328.87	12958	0.687675	60	108.997
46	Daqing	2005	0	2	1	3	16.8603	239.53	108893	8.54031	48.98	182.825
47	Shanghai	2005	0	3	1	3	31.6279	1971.79	52889	0.961478	70.97	222.069
48	Nanjing	2005	0	3	1	3	53.1863	1087	44058	1.03337	81.2	231.549
49	Wuxi	2005	0	3	1	3	14.8258	1407.83	71589	1.34256	72.1	104.994
50	Xuzhou	2005	1	2	1	3	21.1484	1550.69	31755	1.41613	84.9	74.8777
51	Changzhou	2005	0	3	1	3	32.9961	1184.39	34874	1.85832	86.8	146.687
52	Suzhou	2005	0	3	1	3	22.898	1364.3	59518	1.71268	72.8	165.852
53	Nantong	2005	0	3	2	2	36.4688	2404.51	36753	1.66397	75.2	167.233
54	Lianyungang	2005	0	2	2	2	32.8475	781.4	27373	1.37181	70.1	101.496
55	huai'an	2005	0	2	2	3	16.5246	861.59	13510	1.43746	56.7	21.5695
56	Yancheng	2005	0	2	2	3	26.2296	883.21	17795	1.3715	75	47.8487
57	Yangzhou	2005	0	3	2	3	31.4464	1180.1	32643	1.60027	81	114.898
58	Zhenjiang	2005	0	3	2	3	39.9987	942.7	34614	1.72065	75.9	152.814
59	Taizhou	2005	0	2	2	2	24.8529	1509.05	35541	2.60887	80.1	89.3184
60	Suqian	2005	0	2	2	3	10.7901	730.88	9269	1.88539	35	9.963
61	Hangzhou	2005	0	3	1	3	31.3123	1334.81	57746	1.04324	72.27	179.066
62	Ningbo	2005	0	3	1	3	26.3845	833.63	65324	1.22709	59.19	171.196
63	Wenzhou	2005	0	3	1	3	29.1442	1171.19	48825	1.21509	24.09	141.332
64	Jiaxing	2005	0	3	2	2	31.7538	835.02	36440	1.29053	52.75	115.403
65	Huzhou	2005	0	3	2	3	27.2397	689.72	27832	1.47458	66.08	75.78
66	Shaoxing	2005	0	3	2	2	33.6118	1791.16	40175	1.15888	60.24	134.639
67	Jinhua	2005	0	3	2	2	32.0101	450.88	22261	0.980624	78.04	71.2782
68	Quzhou	2005	0	3	2	2	90.6295	341.74	17020	1.11615	49.73	154.375
69	Zhoushan	2005	0	3	2	2	20.2473	672.28	29150	0.820033	17.26	58.9929
70	Taizhou	2005	0	3	2	3	27.8262	968.42	31698	1.22082	46.79	87.7916
71	Lishui	2005	0	3	2	1	40.1022	248.87	21636	0.87173	31.01	86.6506
72	Hefei	2005	0	2	1	3	30.7243	2941.44	39792	0.861642	77.9	118.151
73	Wuhu	2005	0	3	2	2	97.7098	3164.78	37457	1.45282	5.18	360.956
74	Bengbu	2005	0	2	2	2	67.5692	1505.32	17700	1.08749	52.93	118.968
75	Huainan	2005	0	3	2	3	72.795	1098.05	11522	1.36599	45.71	83.589
76	Ma'anshan	2005	0	3	2	2	157.361	1722.88	51811	2.31377	75.25	808.018
77	Huaibei	2005	0	2	2	2	53.6962	1700.18	17577	2.03628	68.51	93.75
78	Tongling	2005	0	3	2	1	103.769	1527.14	39085	1.90241	52.81	390.879
79	Anqing	2005	0	3	2	2	144.375	889.65	20645	1.08859	30.78	298.056
80	Huangshan	2005	0	3	2	1	35.1499	179.63	16954	0.57875	27.07	59.5912
81	Fuyang	2005	0	2	2	3	59.0499	1042.54	5820	0.749455	25.73	34.1807
82	Suzhou	2005	0	2	2	3	31.8557	609.14	6858	0.708864	27.74	21.7687
83	Lu'an	2005	0	2	2	3	56.9827	500.14	3878	0.795573	39.8	22.0982
84	Bozhou	2005	0	2	2	3	32.9611	644.07	5756	0.822336	24.25	21.0016
85	Fuzhou	2005	0	3	1	3	32.8269	1688.49	29188	0.832027	70.48	133.297
86	Xiamen	2005	0	3	1	3	20.8418	976.55	44737	1.27456	70.01	136.921
87	Putian	2005	0	3	2	3	25.8325	14052.4	15160	1.83949	63.01	36.9601
88	Sanming	2005	0	3	2	1	81.5095	241.26	24070	1.42775	46.86	263.019
89	Quanzhou	2005	0	3	2	3	27.7804	1893.02	26645	1.27042	20.09	94.1692
90	Zhangzhou	2005	0	3	2	2	30.0425	1330.67	26805	0.953256	75.18	88.1184
91	Nanping	2005	0	3	2	1	57.1427	183.38	18279	1.40433	29.3	107.278
92	Longyan	2005	0	3	2	1	35.2263	174.5	27709	1.73736	35.44	118.853
93	Nanchang	2005	0	3	1	3	52.0921	3493.03	33298	1.221	73.12	167.442
94	Jingdezhen	2005	0	3	2	1	60.0239	1039.48	23758	1.45833	80	149.511
95	Pingxiang	2005	0	3	2	2	43.3138	750.64	17269	1.88655	7	76.3627
96	Xinyu	2005	0	3	2	2	56.7334	447.09	18635	1.71381	43.1	106.462
97	Shangrao	2005	0	3	2	1	57.184	1097.94	14801	0.807864	72	84.0677
98	Ji'nan	2005	0	2	1	3	22.797	1068.07	41148	0.834121	63.6	92.9198
99	Qingdao	2005	0	2	1	3	22.5928	1881.15	55471	1.19817	63.55	125.325
100	Zibo	2005	1	2	1	3	21.7171	927.75	42019	2.32344	85	91.1126
101	Zaozhuang	2005	0	2	2	3	39.0662	682.27	17689	2.58107	39.36	66.751
102	Dongying	2005	0	2	1	2	18.3617	247.21	111843	7.06623	76.14	203.832
103	Yantai	2005	0	2	1	3	11.4059	647.54	43580	1.66871	87.86	50.4142
104	Weifang	2005	0	2	2	3	23.3051	622.11	28186	1.66538	72.14	65.4545
105	Ji'ning	2005	0	2	2	3	36.7593	1182.65	26528	1.70737	73.12	97.141
106	Tai'an	2005	0	2	2	3	25.7341	769.57	20380	0.686509	58.13	52.338
107	Weihai	2005	0	2	2	2	14.9243	829.69	58436	1.53765	81.57	87.2053
108	Rizhao	2005	0	2	2	3	21.2858	629.92	22632	1.268	48.42	48.8021
109	Laiwu	2005	0	2	2	3	28.5207	553.78	20616	2.64858	50.81	58.7795
110	Linyi	2005	0	2	2	3	25.277	1104.57	21547	1.99844	40.07	53.2377
111	Dezhou	2005	0	2	2	2	24.1215	1082.75	33364	1.76855	75.55	79.9863
112	Liaocheng	2005	0	2	2	3	47.5693	822.57	11571	1.30429	41.92	54.7407
113	Binzhou	2005	0	2	2	2	25.7905	602.69	23842	1.80796	45	61.1943
114	Heze	2005	0	2	2	3	67.4698	986.64	6365	1.17807	41.94	42.6187
115	Zhengzhou	2005	1	2	1	3	40.632	2530.2	29323	0.579974	56.27	119.147
116	Kaifeng	2005	0	2	2	2	81.6407	2289.78	11887	0.868799	13.39	97.0443
117	Luoyang	2005	0	2	2	3	38.3576	2752.02	28949	1.25379	41.57	111.041
118	Pingdingshan	2005	0	2	2	2	52.7602	2076.03	20946	2.76274	71.56	110.505
119	Anyang	2005	0	2	2	3	77.8431	1896.51	18678	2.10715	50.24	145.391
120	Hebi	2005	0	2	2	2	53.976	867.16	17254	2.05241	30.62	93.1263
121	Xinxiang	2005	0	2	2	2	59.1596	2536.99	19237	1.36434	31.91	113.807
122	Jiaozuo	2005	0	2	2	2	61.9072	1913.21	16474	1.87518	55.13	101.985
123	Puyang	2005	0	2	2	2	26.3126	2058.08	33023	3.65007	82.51	86.8996
124	Xuchang	2005	0	2	2	1	52.5144	4425.86	21382	2.88142	83	112.283
125	Luohe	2005	0	2	2	3	46.1577	1279.61	15085	2.87206	42.95	69.6292
126	Sanmengxia	2005	0	2	2	1	47.1399	1439.39	17911	1.28448	78.92	84.4211
127	Nanyang	2005	0	2	2	3	28.6178	871.18	14056	1.7065	34.43	40.2248
128	Shangqiu	2005	0	2	2	3	52.8085	996.88	8542	1.16704	58.34	45.1097
129	Xinyang	2005	0	2	2	3	37.3425	382.57	9956	1.19974	67.65	37.1773
130	Zhoukou	2005	0	2	2	1	72.1966	2875	13671	0.873217	42.94	98.7074
131	Zhumadian	2005	0	2	2	2	36.4257	780.7	14180	1.39396	85	51.6509
132	Wuhan	2005	0	3	1	3	42.9383	943.44	26238	0.918499	37	119.916
133	Huangshi	2005	0	3	2	2	103.625	2666.67	29998	1.35322	28.22	312.975
134	Shiyan	2005	0	3	2	2	63.4646	432.61	36704	1.30555	48.56	232.939
135	Yichang	2005	0	3	2	3	42.276	287.74	28819	2.33345	60.55	121.46
136	Xiangfan	2005	1	3	2	3	77.9902	591.8	16966	1.27378	23.59	132.714
137	Ezhou	2005	0	3	2	3	173.131	693.62	13908	1.29781	58.56	243.913
138	Jingmen	2005	0	3	2	2	55.6282	297.51	17860	1.14286	3	113.965
139	Xiaogang	2005	0	3	2	2	49.7873	943.97	8569	0.951815	12.5	40.2688
140	Jingzhou	2005	0	3	2	3	70.8219	705.58	10278	1.00653	37	79.5054
141	Xianning	2005	0	3	2	2	98.2801	378.65	8662	1.13972	10	91.9215
142	Suizhou	2005	0	3	2	3	36.7813	230.75	8050	1.30972	40	29.6335
143	Changsha	2005	0	3	1	3	45.9003	3750.47	39045	0.5048	49.4	201.145
144	Zhuzhou	2005	0	3	2	2	157.002	1455.35	27956	1.38304	57.01	497.781
145	Xiangtan	2005	0	3	2	2	223.679	2572.76	29591	1.23365	25.73	658.93
146	Hengyang	2005	0	3	2	2	217.359	1729.98	13985	0.666784	26	285.087
147	Shaoyang	2005	0	3	2	2	178.734	1167.89	10051	0.803753	65	180.261
148	Yueyang	2005	0	3	2	2	163.343	756.78	28759	1.41341	63	483.496
149	Changde	2005	0	3	2	3	30.4425	501.93	17563	1.53653	22.52	56.443
150	Zhangjiajie	2005	0	3	2	1	34.7493	176.13	12668	0.304284	19.82	41.8552
151	Yiyang	2005	0	3	2	3	46.6004	670.9	9016	0.709407	58.9	37.9294
152	Chenzhou	2005	0	3	2	2	64.7599	290.83	17140	1.2319	54.51	126.225
153	Yongzhou	2005	0	3	2	3	60.5387	338.05	10448	0.750337	10.18	60.0838
154	Huaihua	2005	0	3	2	1	74.9716	501.29	16781	0.437651	15	125.806
155	Guangzhou	2005	0	3	1	3	37.406	1606.25	78428	0.647632	71.34	290.413
156	Shaoguan	2005	0	3	2	2	30.7294	316.06	21124	1.10378	13	63.3447
157	Shenzhen	2005	0	3	1	3	28.174	932.02	60801	1.14117	61	766.707
158	Zhuhai	2005	0	3	1	2	37.5902	531.06	45284	1.22692	31	266.384
159	Shantou	2005	0	3	1	3	41.3968	2474.69	13284	1.21293	37	55.2897
160	Foshan	2005	0	3	1	3	15.9925	920.85	41266	1.65843	64	107.518
161	Jiangmen	2005	0	3	2	3	55.4343	736.14	26908	1.19382	29.5	170.216
162	Zhanjiang	2005	0	3	2	3	32.0783	993.7	18417	1.85999	20.33	83.1403
163	Maoming	2005	0	3	2	3	41.7758	1388.44	25269	1.14375	39.07	99.9341
164	Zhaoqing	2005	0	3	2	1	56.5586	728.77	27912	0.59871	52	164.435
165	Huizhou	2005	0	3	1	3	35.1029	428.41	28930	1.81554	37	148.72
166	Meizhou	2005	0	3	2	1	40.5455	954.66	19579	1.65891	35	79.8634
167	Heyuan	2005	0	3	2	1	60.4084	645.56	17157	0.994162	11	106.713
168	Yangjiang	2005	0	3	2	2	41.7488	965.05	18417	0.878869	28	76.4882
169	Qingyuan	2005	0	3	2	2	54.4236	587.27	15662	1.002	9.7	90.687
170	Dongguang	2005	0	3	1	3	71.0938	2661.54	33263	1.33561	13.2	236.408
171	Zhongshan	2005	0	3	1	3	8.80934	782.33	36208	1.73992	67	55.0632
172	Chaozhou	2005	0	3	2	1	83.2478	2260.53	18670	1.03364	36.9	173.108
173	Jieyang	2005	0	3	2	2	58.4091	3680.11	13600.1	1.27392	49	84.3567
174	Yunfu	2005	0	3	2	1	43.0836	373.62	17330	1.5196	15	72.5676
175	Nanning	2005	0	3	1	3	56.0835	385.35	20921	0.548409	19.26	115.989
176	Beihai	2005	0	3	2	2	31.2865	582.97	18439	0.93398	14.81	63.506
177	Qinzhou	2005	0	3	2	3	27.7505	255.83	8105	0.764804	48.55	22.5426
178	Hezhou	2005	0	3	2	2	32.9852	180.78	8409	1.41647	38.37	27.6788
179	Hechi	2005	0	3	2	1	132.556	133.8	12381	1.14286	49.49	163.526
180	Sanya	2005	0	3	2	2	67.0625	266.75	14560	0.56051	63.25	97.226
181	Chengdu	2005	0	3	1	3	36.7132	2215.4	32130.6	0.751942	52.51	115.581
182	Zigong	2005	0	2	2	3	40.5736	1022.25	12944	1.28287	70	48.7279
183	Panzhihua	2005	0	3	2	2	53.3472	335.93	25740	2.68762	15.13	147.706
184	Luzhou	2005	0	3	2	3	58.3607	662.85	11114	1.21538	55.74	60.7133
185	Deyang	2005	0	3	2	2	51.5428	986.73	17445	1.49044	27.8	89.6778
186	Mianyang	2005	1	3	2	3	34.812	729.3	19055	1.26562	43.34	65.7031
187	Guangyuan	2005	0	3	2	2	77.5461	201.49	6961	0.947784	8.16	55.9382
188	Suining	2005	0	3	2	3	48.6464	788.59	5890	0.906542	17.5	27.8239
189	Neijiang	2005	0	3	2	3	49.8392	883.43	7015	1.1197	12.08	34.7883
190	Nanchong	2005	0	3	2	3	64.0182	746.58	6590	0.942422	12.44	41.9114
191	Guang'an	2005	0	3	2	3	36.9931	802.8	6966	0.989136	72.1	21.1418
192	Dazhou	2005	0	3	2	1	64.7872	867.85	11295	1.35772	49.97	81.349
193	Bazhong	2005	0	3	2	3	46.8329	505.03	4657	0.408461	29.32	18.2113
194	Guiyang	2005	0	3	2	3	58.2831	858.41	20863	0.913725	20.41	117.226
195	Zunyi	2005	0	3	2	2	43.498	1157.37	16033	0.843444	66.67	72.9164
196	Kunming	2005	0	3	1	3	46.3547	582.56	24873	0.88891	64.01	162.367
197	Qujing	2005	0	3	2	2	24.5809	418.93	19824	1.46977	56.79	48.8165
198	Yuxi	2005	0	3	2	1	9.6743	401.29	55510	3.15787	41.77	53.4624
199	Baoshan	2005	0	3	2	2	30.8768	171.3	5799	0.69598	18.64	17.8588
200	Lijiang	2005	0	3	2	1	45.9334	116.49	14534	0.376086	73.73	66.1423
201	Simao	2005	0	3	2	1	27.5258	52.47	8595	0.624763	16	28.8695
202	Tongchuan	2005	0	2	2	2	22.6494	311.85	9265	1.30202	58	19.7254
203	Baoji	2005	0	2	2	2	32.8822	213.01	31586	1.39741	66.02	102.772
204	Weinan	2005	0	2	2	2	55.779	753.73	7087	1.28329	14.36	39.4871
205	Yan'an	2005	0	2	2	1	10.3036	113.53	30877	5.97564	67	31.6324
206	Hanzhong	2005	0	2	2	2	63.805	954.5	9331	0.848003	66.9	59.3179
207	Ankang	2005	0	2	2	2	45.517	260.63	5627	0.597952	31.6	25.5897
208	Lanzhou	2005	0	2	1	3	45.9304	1240.01	29473	0.905437	57.89	114.172
209	Jiayuguang	2005	0	1	2	1	104.616	58.67	44686	4.00203	72.85	493.961
210	Jinchang	2005	0	1	2	1	81.2934	69.73	45221	6.26129	1.28	366.651
211	Baiyin	2005	0	1	2	1	115.969	136.66	19884	1.97504	24.48	230.591
212	Wuwei	2005	0	1	2	2	16.6597	193.98	9415	0.913242	65.21	16.0917
213	Zhangye	2005	1	1	2	2	25.2432	118.33	10156	0.792453	35	25.2342
214	Jiuquan	2005	0	1	2	1	63.5114	102.98	10523	0.459428	95	67.766
215	Dingxi	2005	0	1	2	1	23.6509	108.78	3420	0.51886	37.07	8.42037
216	Longnan	2005	0	2	2	2	10.2667	114.69	2662	0.291667	8.59	2.7183
217	Xining	2005	0	2	2	3	67.9959	2946.86	16116	0.569502	32.9	108.513
218	Yinchuan	2005	1	2	2	2	46.9411	474.09	27010	0.702826	61.63	126.787
219	Shizuishan	2005	1	1	2	1	99.1603	195.22	18855	2.37452	30.05	188.022
220	Wuzhong	2005	1	2	2	1	55.3888	303.36	9689	0.907965	51.01	50.3268
221	Zhongwei	2005	1	2	2	1	18.1541	58.81	9449	0.916242	13.2	17.1117
222	Wulumuqi	2005	0	1	1	3	30.8218	279.58	26137	0.606488	70.1	92.1179
223	Kelamayi	2005	0	1	2	1	24.9737	31.15	88562	7.94789	91.5	323.907
224	Beijing	2006	1	2	1	3	20.7954	924.67	46136.5	0.388414	92.48	126.581
225	Tianjin	2006	1	2	1	3	19.3959	1048.68	45429.7	1.40382	73.9	87.6451
226	Shijiazhuag	2006	1	2	1	3	32.0797	5073.46	31157.8	0.571519	78.6	98.3964
227	Tangshan	2006	0	2	1	3	20.642	2448.54	36007.9	1.86849	80.5	74.0545
228	Qinhuangdao	2006	0	2	2	2	35.654	2173	37759.3	0.531372	84.7	133.57
229	Handan	2006	0	2	2	3	61.6763	3322.35	22117.3	2.06215	67.5	135.994
230	Xingtai	2006	0	2	2	2	51.2285	5071.3	21117.3	2.22505	74.7	119.702
231	Baoding	2006	0	2	2	3	39.2015	3372.76	22137.6	0.810491	66.4	84.9187
232	Zhangjiakou	2006	0	2	2	2	50.6096	2278.96	19511.5	1.5739	52.8	102.302
233	Chengde	2006	0	2	2	1	66.7896	1231.23	21791.9	1.7822	0	144.17
234	Cangshou	2006	0	2	2	2	29.1779	2735.52	30082	1.05327	60	87.6149
235	Langfang	2006	1	2	2	2	25.7831	2649.32	18358.9	1.02646	75	47.0527
236	Hengshui	2006	0	2	2	1	31.8295	1684.62	22545	1.51055	73.2	71.1676
237	Taiyuan	2006	1	2	1	3	32.7544	1855.82	30403.4	0.825823	62.72	96.3573
238	Datong	2006	0	2	2	3	39.1042	716.59	18484.8	1.2576	67.59	77.37
239	Yangquan	2006	0	2	2	2	33.9476	968.22	21721.8	1.46356	60.06	74.9624
240	Changzhi	2006	0	2	2	2	56.0366	2056.59	22002.7	0.789084	46.37	123.366
241	Jincheng	2006	0	2	2	1	42.8181	2157.14	19373.9	0.689408	68.98	81.8669
242	Shuozhou	2006	0	2	2	2	93.4666	149.33	17455.3	2.91715	26	161.308
243	Jinzhong	2006	0	2	2	2	45.2698	427.15	12544.7	0.847556	68	55.5714
244	Yuncheng	2006	0	2	2	2	40.1919	529.59	9934.7	0.486149	34.41	39.2403
245	Xinzhou	2006	0	2	2	2	30.3126	262.36	5921.29	0.766455	1	17.8846
246	Linfen	2006	0	2	2	2	22.813	594.6	15600.2	0.966579	25.55	34.2875
247	Lvliang	2006	0	2	2	1	20.7845	194.26	11353.3	1.55588	0	22.6283
248	Huhehaote	2006	0	2	1	3	23.4966	542.89	34023.6	0.453426	43.08	111.29
249	Baotou	2006	1	1	1	3	36.1485	530.18	51866.9	1.17415	60.82	186.373
250	Wuhai	2006	0	1	2	1	71.798	247.15	27462.5	1.81375	92.3	212.641
251	Chifeng	2006	0	2	2	3	28.8005	163.78	13515.6	1.12774	47.5	38.7077
252	Tongliao	2006	0	2	2	2	65.495	252.96	15559.4	1.34311	53.77	93.4769
253	E'erduosi	2006	0	1	2	1	8.11668	92.7	44135.6	0.658524	44.99	53.8559
254	Hulunbei'er	2006	0	2	2	1	39.8854	180.56	19398.5	0.419477	43.63	76.8077
255	Bayanzhuo'er	2006	0	1	2	2	10.0278	229.52	13665.5	0.99636	100	13.437
256	Wulanchabu	2006	0	1	2	1	68.8109	2582.46	13337.8	0.647039	90	91.7799
257	Shenyang	2006	0	2	1	3	32.9212	1430.33	40269.8	0.893699	73	132.042
258	Dalian	2006	1	2	1	3	23.0752	1191.35	48723.2	0.936836	80.37	130.141
259	Anshan	2006	1	2	1	3	19.67	2350.96	47652.9	1.55143	19.9	86.5985
260	Fushun	2006	0	3	2	3	39.626	1964.57	22963.1	1.60016	54.1	91.11
261	Benxi	2006	0	3	2	2	122.895	734.1	27435	1.80884	76.16	337.544
262	Dandong	2006	0	3	2	2	40.5602	899.52	19366.4	0.793301	0	78.5914
263	Jinzhou	2006	0	2	2	2	75.3198	2022.71	24216.2	1.09131	36.24	181.733
264	Yingkou	2006	0	2	2	2	34.6911	1233.52	21994.7	1.58585	62.26	76.223
265	Fuxin	2006	0	2	2	2	75.7155	1746.65	12161.7	0.88113	0	92.0383
266	Liaoyang	2006	0	2	2	2	93.2176	1252.44	18947.3	2.05284	61	238.768
267	Panjin	2006	0	2	2	2	26.2727	2201.13	59080	5.33312	53.11	154.108
268	Tieling	2006	0	2	2	1	45.3137	693.57	17272.4	1.94242	73.74	77.9661
269	Chaoyang	2006	0	2	2	1	55.4254	453.65	14413.9	1.1723	0	91.1706
270	Huludao	2006	0	2	2	2	17.9215	418.9	24087.9	1.91631	93.08	37.203
271	Changchun	2006	0	2	1	3	24.8954	973.4	34209.6	1.33104	56.43	79.8578
272	Jilin	2006	0	3	2	3	231.856	496.31	19543.5	1.22945	31.98	453.12
273	Siping	2006	1	2	2	2	33.5236	814.59	13272.2	1.25984	84	41.5561
274	Liaoyuan	2006	0	2	2	1	25.1318	1091.62	18469.6	1.4899	39.23	46.4211
275	Tonghua	2006	0	3	2	1	48.0553	601.18	20842.6	2.18494	0	99.7596
276	Baishan	2006	0	3	2	2	27.2574	216.56	14991.3	1.47472	0	40.827
277	Songyuan	2006	0	2	2	2	24.2683	478.36	32019.1	4.5912	0	77.176
278	Baicheng	2006	0	2	2	2	79.1711	201.19	9716.52	0.904901	0	76.6732
279	Ha'erbin	2006	0	3	1	3	29.406	1105.96	26859.1	0.726765	63.61	78.2635
280	Qiqiha'er	2006	0	2	2	3	46.5069	330.4	13651.2	0.700107	34.62	62.6889
281	Jixi	2006	0	3	2	2	28.5904	387.43	10012.5	0.760009	0	28.7285
282	Hegang	2006	0	3	2	2	59.9403	150.41	11170.4	1.5589	0	66.9832
283	Shuangyashan	2006	0	3	2	1	42.9916	283.13	13222.1	1.87663	0	56.9135
284	Daqing	2006	1	2	1	3	33.2114	245.53	109881	8.38149	65.76	362.07
285	Yichun	2006	0	3	2	2	38.7769	41.69	9685.99	1.02365	0	38.1402
286	Jiamusi	2006	0	3	2	2	73.4878	437.81	15331.8	0.398118	4.55	112.559
287	Mudanjiang	2006	0	3	2	2	69.5476	586.01	12377.3	0.695728	0	86.5353
288	Suihua	2006	0	2	2	2	53.6058	321.26	3973.24	0.25628	0	21.2333
289	Shanghai	2006	1	3	1	3	31.8702	2518.13	52951.8	0.956436	77.03	224.867
290	Nanjing	2006	1	3	1	3	52.8046	1110.82	42911.2	0.98599	78.6	224.161
291	Wuxi	2006	0	3	1	3	17.9187	1431.3	71476.9	1.31488	82.7	127.03
292	Xuzhou	2006	1	2	1	3	24.1245	1565.52	36004.4	1.40762	86	86.4482
293	Changzhou	2006	0	3	1	3	29.7669	1193.56	46540.5	1.74291	81.2	138.008
294	Suzhou	2006	0	3	1	3	22.215	1394.85	74424.7	1.63482	90.2	163.524
295	Nantong	2006	0	3	2	2	37.4656	2440.56	46087.9	1.53472	80.3	171.376
296	Lianyungang	2006	0	2	2	2	40.4157	752.49	29338.6	1.29478	66.7	117.911
297	huai'an	2006	0	2	2	3	21.1653	871.9	12896.4	1.38202	80.4	27.134
298	Yancheng	2006	0	2	2	3	34.9312	887.44	18473.5	1.36259	72	64.3933
299	Yangzhou	2006	0	3	1	3	25.6765	1192.04	37913.8	1.52961	81.1	96.867
300	Zhenjiang	2006	0	3	2	3	35.6397	949.35	38752	1.67568	76	137.627
301	Taizhou	2006	0	2	2	2	22.1744	1447.07	36839.9	2.49714	85.7	81.1362
302	Suqian	2006	0	2	2	3	17.7092	736.95	9690.17	1.98593	49.6	17.0904
303	Hangzhou	2006	0	3	1	3	26.9314	1350	58363.5	0.990385	74.94	156.294
304	Ningbo	2006	0	3	1	3	25.5136	843.01	65371.4	1.18103	68.89	165.863
305	Wenzhou	2006	0	3	1	3	35.9944	1184.16	48894.6	1.2086	22.5	175.028
306	Jiaxing	2006	0	3	2	2	21.3377	840.91	36953.5	1.33853	60.53	78.5749
307	Huzhou	2006	0	3	2	3	22.4284	690.62	28806	1.62684	59.55	64.5444
308	Shaoxing	2006	0	3	2	2	34.8075	1792.54	40470.6	1.17858	59.96	140.823
309	Jinhua	2006	0	3	2	2	24.3683	451.13	22867.4	1.03817	53.61	55.7098
310	Quzhou	2006	0	3	2	2	86.4877	344.21	17408.3	1.17912	50.51	150.025
311	Zhoushan	2006	0	3	2	2	18.248	673.05	30199.3	0.850194	17.79	55.8173
312	Taizhou	2006	0	3	1	3	22.6862	977.86	32141.4	1.20792	49.62	72.5632
313	Lishui	2006	0	3	2	1	33.5853	251.33	22531.2	0.873504	26.9	75.3113
314	Hefei	2006	0	2	1	3	32.8169	2303.34	39352	0.943836	98.05	123.18
315	Wuhu	2006	0	3	2	3	77.9457	1448.89	29906	1.55261	7.63	231.288
316	Bengbu	2006	0	2	2	2	37.3279	1521.3	17968.1	1.08398	45.35	66.7177
317	Huainan	2006	0	3	2	3	64.6219	975.52	12297	1.44736	72.64	79.1404
318	Ma'anshan	2006	0	3	2	2	154.653	1817.06	51463.7	2.14254	74.53	790.871
319	Huaibei	2006	1	2	2	3	56.001	1413.93	14808.5	1.71105	36.3	80.968
320	Tongling	2006	0	3	2	1	94.7181	1240.86	44320	2.35673	70.25	416.601
321	Anqing	2006	0	3	2	2	47.1896	897.81	19927.3	0.942719	31.28	93.6101
322	Huangshan	2006	0	3	2	1	29.5001	182.49	17355.5	0.620565	21.9	50.7955
323	Chuzhou	2006	0	3	2	2	32.0693	369.73	17266.8	1.09172	0	55.0761
324	Suzhou	2006	0	2	2	3	36.0821	615.86	6900.71	0.701118	33.46	24.7636
325	Lu'an	2006	0	2	2	3	123.08	503.77	3980.5	0.678506	42.54	48.8199
326	Bozhou	2006	0	2	2	3	30.4327	661.05	6455.67	0.829478	49.1	19.3952
327	Chizhou	2006	0	3	2	2	31.6336	264.8	9181.74	1.31403	21.86	28.913
328	Fuzhou	2006	0	3	1	3	40.0033	1742.28	27264.8	0.754533	77	154.254
329	Xiamen	2006	0	3	1	3	25.34	1022.18	43667.2	1.20975	83.17	160.756
330	Putian	2006	1	3	2	3	18.0236	899.43	15526.1	1.96049	45.4	26.3447
331	Sanming	2006	0	3	2	1	85.6909	239.81	23744.8	1.52128	46.37	278.018
332	Quanzhou	2006	0	3	2	3	32.937	1921.55	27586.2	1.29137	82.73	115.13
333	Zhangzhou	2006	0	3	2	2	35.4619	1343.89	26844.9	1.02356	72.7	103.711
334	Nanping	2006	0	3	2	1	58.2527	183.82	17861.5	1.46632	39.05	107.036
335	Longyan	2006	0	3	2	1	27.5162	175.58	28096.7	1.82961	52.82	94.2152
336	Ningde	2006	0	3	2	1	25.3536	278.27	13399	0.449467	0	33.1541
337	Nanchang	2006	0	3	1	3	47.6797	3587.03	37571.7	1.27436	70.06	155.901
338	Jingdezhen	2006	0	3	2	1	57.2318	1056.5	25486.2	1.50579	1.3	147.102
339	Pingxiang	2006	1	3	2	2	45.8478	770.37	17595.7	1.86677	7	80.7692
340	Jiujiang	2006	0	3	2	2	126.179	1000.17	34314.3	1.41041	7.08	430.664
341	Xinyu	2006	0	3	2	2	53.5453	453.38	19542.3	1.88611	39.4	106.448
342	Yingtan	2006	0	3	2	1	85.9885	1448.18	12996.4	0.37013	0	100.151
343	Ganzhou	2006	0	3	2	2	59.0032	1209.19	16059.7	0.7135	0	90.366
344	Ji'an	2006	0	3	2	2	36.2668	374.67	9989.31	0.954494	0	36.0178
345	Yichun	2006	0	3	2	3	48.2208	398.74	5922.53	1.04267	18	28.437
346	Fuzhou	2006	0	3	2	3	45.7855	498.77	8287.62	1.25382	55.02	37.8202
347	Shangrao	2006	0	3	2	1	53.0481	1114	16150.5	0.8483	63.83	79.7455
348	Ji'nan	2006	0	2	1	3	20.7715	1081.64	41287.5	0.820787	63.24	85.2224
349	Qingdao	2006	0	2	1	3	19.6418	1920.62	56217.8	1.1718	81.65	112.635
350	Zibo	2006	1	2	1	3	21.0281	928.64	41862.4	2.13214	85	87.8892
351	Zaozhuang	2006	0	2	2	3	19.7418	694.95	18230	2.44065	55.21	34.2508
352	Dongying	2006	0	2	1	2	13.6553	249.33	97844.9	5.35457	76.68	156.715
353	Yantai	2006	0	2	1	3	11.0673	656.31	47238.7	1.66399	87.88	51.9088
354	Weifang	2006	0	2	2	3	23.8407	896.99	26827.5	1.48713	73.1	63.5114
355	Ji'ning	2006	0	2	2	3	32.7109	1033.84	26969.5	1.70846	84.8	87.7029
356	Tai'an	2006	0	2	2	3	24.8984	770.96	21493.9	0.67105	77.72	53.2007
357	Weihai	2006	0	2	2	2	17.6805	806.24	61800.5	1.51816	82.38	108.065
358	Rizhao	2006	0	2	2	3	24.6993	633.21	21512.2	1.47836	79.69	53.1915
359	Laiwu	2006	0	2	2	3	27.6836	555.92	20409.4	2.40387	84.95	56.3912
360	Linyi	2006	0	2	2	3	25.5687	1104.32	21393.7	1.75905	71.78	51.0259
361	Dezhou	2006	1	2	2	2	24.0738	1098.33	35216.9	1.74179	53.32	84.7804
362	Liaocheng	2006	0	2	2	3	41.7283	826.79	11946	1.31417	55.09	49.5756
363	Binzhou	2006	0	2	2	2	52.9455	605.28	24646.3	1.72316	65	130.49
364	Heze	2006	0	2	2	3	73.3819	1031.52	6475.61	1.09972	59.93	46.3415
365	Zhengzhou	2006	1	2	1	3	36.2551	2586.14	29968.5	0.558004	64.34	107.477
366	Kaifeng	2006	0	2	2	2	76.4548	2305.8	11909.1	0.873166	23.12	90.7392
367	Luoyang	2006	0	2	1	3	37.5701	2825.18	29874.1	1.33897	43.2	110.781
368	Pingdingshan	2006	0	2	2	2	63.247	2117.65	21569.9	3.00285	92.69	135.082
369	Anyang	2006	0	2	2	3	72.4709	1921.14	17487.8	2.18229	61.46	125.921
370	Hebi	2006	0	2	2	2	54.8447	863.38	17602.3	1.94245	52.91	96.7478
371	Xinxiang	2006	0	2	2	2	63.3298	2861.27	18708.9	1.31563	61.01	115.576
372	Jiaozuo	2006	0	2	2	2	65.9898	1930.42	15375.9	1.69744	55.01	101.014
373	Puyang	2006	0	2	2	2	25.0733	2416.92	32055.9	3.54657	82.53	74.4112
374	Xuchang	2006	0	2	2	1	56.5445	4139.18	20835.7	2.89588	83.93	116.364
375	Luohe	2006	0	2	2	3	50.7462	1301.47	15209.8	2.92141	37	76.5348
376	Sanmengxia	2006	0	2	2	1	32.7393	1448.99	19644.2	1.63732	93.32	64.099
377	Nanyang	2006	0	2	2	3	34.3295	890.56	12748.3	1.43855	41.25	43.2887
378	Shangqiu	2006	0	2	2	3	74.4775	1025.75	8252.62	1.07128	39.14	60.602
379	Xinyang	2006	0	2	2	3	24.6308	387.15	10171.3	1.2294	76.58	24.905
380	Zhoukou	2006	0	2	2	1	55.188	3347.3	12576.9	0.856	57.48	64.5135
381	Zhumadian	2006	0	2	2	2	29.5054	799.22	14671.3	1.44686	80.01	42.7877
382	Wuhan	2006	0	3	1	3	40.7007	3103.53	40230.6	0.895454	65.79	160.562
383	Huangshi	2006	0	3	2	2	94.8022	2671.31	30204.1	1.26296	65.19	285.847
384	Shiyan	2006	0	3	2	2	78.667	435.29	33384.3	1.05763	52.65	262.623
385	Yichang	2006	0	3	2	3	41.0468	289.48	24813.6	2.00158	80.3	110.49
386	Xiangfan	2006	1	3	2	3	67.9182	588.86	17144	1.266	31.35	116.728
387	Ezhou	2006	0	3	2	3	176.595	707.71	14458.5	1.44314	58.23	246.712
388	Jingmen	2006	1	3	2	2	56.2719	300.74	18981.4	1.31963	3	106.418
389	Xiaogang	2006	0	3	2	2	41.927	972.83	8083.92	0.965635	13.8	32.4459
390	Jingzhou	2006	0	3	2	3	65.427	711.29	11482.3	1.05762	22.48	74.8617
391	Huanggang	2006	0	3	2	1	89.0578	1057.79	11485	0.956324	26	102.035
392	Xianning	2006	0	3	2	2	96.446	385.34	9537.99	1.19513	10.59	91.1933
393	Suizhou	2006	0	3	2	3	36.8379	228.44	8933.75	1.28676	40	29.8885
394	Changsha	2006	0	3	1	3	45.5768	3859.71	39726.4	0.509618	44.9	201.901
395	Zhuzhou	2006	0	3	2	2	124.002	1478.11	27349.4	1.36074	53.5	397.403
396	Xiangtan	2006	0	3	2	2	31.7168	2582.77	27537.4	1.33413	45.6	95.25
397	Hengyang	2006	0	3	2	2	178.893	1756.55	13779.9	0.913797	28	238.972
398	Shaoyang	2006	0	3	2	2	145.798	1149.3	10115	0.865404	0	154.831
399	Yueyang	2006	1	3	2	3	150.334	822.36	28315.5	1.53875	63	444.937
400	Changde	2006	0	3	2	3	26.319	506.8	19710.3	1.5853	38.17	54.766
401	Zhangjiajie	2006	0	3	2	1	45.8379	177.6	12704.1	0.288309	40.99	56.0815
402	Yiyang	2006	0	3	2	3	48.6473	674.37	9251.34	0.759113	64.52	40.5242
403	Chenzhou	2006	0	3	2	2	61.3158	292.52	17204.1	1.30263	14.98	119.68
404	Yongzhou	2006	0	3	2	3	75.8413	339.57	10726.4	0.712858	11.11	75.4079
405	Huaihua	2006	0	3	2	1	62.4191	431.05	16755.8	0.414064	17	122.449
406	Loudi	2006	0	3	2	1	39.1324	1005.4	21941.2	1.96123	0	86.4814
407	Guangzhou	2006	0	3	1	3	35.1269	1627.01	58819.4	0.653866	71.67	276.649
408	Shenzhen	2006	1	3	1	3	28.6279	1007.83	60602.1	1.10628	65.23	737.83
409	Zhuhai	2006	0	3	1	2	41.7123	548.82	45536.6	1.32099	44.43	293.803
410	Shantou	2006	0	3	1	3	38.1875	2495.5	13068.1	1.27341	36.07	49.9816
411	Foshan	2006	0	3	1	3	25.0885	932.81	43832.5	1.82377	65.49	179.031
412	Jiangmen	2006	0	3	1	3	48.0342	740.92	27705.1	1.32252	30.54	151.128
413	Zhanjiang	2006	0	3	2	3	24.8733	999.59	26684.1	1.97304	41.6	64.6841
414	Maoming	2006	0	3	2	3	45.9659	1420.48	24189.4	1.67692	36.34	103.89
415	Zhaoqing	2006	0	3	2	1	51.3283	743.07	27253.1	0.618877	43.9	147.994
416	Huizhou	2006	0	3	1	3	34.5149	442.59	30112.6	1.84039	23.68	149.873
417	Meizhou	2006	0	3	2	1	619.722	961.49	19301.9	1.82213	35	1191.54
418	Heyuan	2006	0	3	2	1	60.0843	665.11	19701.6	1.34364	15.43	121.617
419	Yangjiang	2006	0	3	2	2	38.4139	982.98	17950.3	0.811765	28.56	67.6098
420	Qingyuan	2006	0	3	2	2	49.5727	593.53	19126.5	1.45858	8.9	102.017
421	Dongguang	2006	0	3	1	3	72.1002	682.8	34439.8	1.40459	26.32	981.795
422	Zhongshan	2006	0	3	1	3	8.41434	790.33	36699.8	1.74384	71.72	53.4866
423	Chaozhou	2006	0	3	2	1	91.9874	2272.37	17918.8	1.08494	27.02	183.063
424	Jieyang	2006	0	3	2	2	57.7011	3731.49	14171	1.32563	0	84.1279
425	Yunfu	2006	0	3	2	1	45.4675	375.98	17582	1.64711	97.33	77.4171
426	Nanning	2006	0	3	1	3	50.1864	393.36	21795.8	0.600657	24.47	108.271
427	Liuzhou	2006	0	3	2	3	111.675	1529.18	38494.7	1.86665	55.45	424.399
428	Guilin	2006	0	3	2	2	52.1843	1317.17	24625	0.766311	81.25	127.694
429	Wuzhou	2006	0	3	2	1	45.5687	446.03	20067.8	0.989767	15.45	91.1711
430	Beihai	2006	1	3	2	2	35.7985	594.78	19152.3	1.14693	14.74	67.8848
431	Fangchenggang	2006	0	3	2	1	30.9729	146.26	14809.9	1.23798	0	45.6747
432	Qinzhou	2006	0	3	2	3	24.4305	261.9	8726.23	1.06497	0	21.0813
433	Guigang	2006	0	3	2	3	24.34	501.3	6845.95	0.922447	0	16.5419
434	Hechi	2006	0	3	2	1	54.3242	135.73	12254.4	1.26931	50.24	66.0894
435	Laibin	2006	0	3	2	3	10.3221	232.08	8648.77	1.7437	0	8.906
436	Chongzuo	2006	0	3	2	1	26.5673	116.33	11184	1.08782	0	29.566
437	Haikou	2006	0	3	2	3	46.3496	766.56	17760	0.45995	81.12	81.6448
438	Sanya	2006	1	3	2	2	56.6203	273.73	18745.8	0.976025	62.9	104.903
439	Chongqing	2006	0	3	1	3	27.6242	580.24	15222.8	0.934847	50.46	40.4754
440	Chengdu	2006	0	3	1	3	30.148	2284.7	34674.3	0.83997	67.55	102.951
441	Zigong	2006	0	2	2	3	33.9696	1027.4	13291.3	1.45216	72.34	42.6154
442	Panzhihua	2006	0	3	2	2	52.3838	338.35	25957.6	2.72638	17.13	149.897
443	Luzhou	2006	0	3	2	3	58.6221	667.31	11368	1.3215	59.42	62.5993
444	Deyang	2006	1	3	2	2	37.4152	990.9	17985	1.64771	34.92	67.1546
445	Mianyang	2006	1	3	2	3	28.359	740.76	19543.7	1.401	44.7	54.9957
446	Guangyuan	2006	0	3	2	2	76.0697	201.1	7509.27	1.01112	7.45	55.5811
447	Suining	2006	0	3	2	3	52.8712	780.85	6007.06	1.02825	14.13	31.0976
448	Neijiang	2006	0	3	2	3	34.8163	889.67	7260.37	1.31845	16.35	25.1666
449	Leshan	2006	0	3	2	3	49.6394	455.89	12564	2.14732	21.12	64.0433
450	Nanchong	2006	0	3	2	3	61.0384	749.11	6797	1.10207	24.12	41.3365
451	Meishan	2006	0	3	2	2	34.757	624.57	10135	1.77858	18	32.5153
452	Yibin	2006	0	3	2	2	35.7133	699.38	20580.8	2.7619	0	76.2159
453	Guang'an	2006	0	3	2	3	27.616	807.68	6889.67	1.0548	17.01	15.9036
454	Dazhou	2006	0	3	2	1	70.6213	885.14	11454.5	1.40292	49.97	89.6293
455	Ya'an	2006	0	3	2	1	70.9713	325.51	10748.5	0.917435	46.4	75.3086
456	Bazhong	2006	0	3	2	3	38.6095	512.12	4599.29	0.458186	33.8	14.8847
457	Guiyang	2006	0	3	2	3	51.1334	872.81	20877.2	0.94133	24.97	101.702
458	Liupanshui	2006	0	3	2	1	33.7015	943.01	19529.6	1.42145	23.45	63.5599
459	Zunyi	2006	0	3	2	2	42.3852	1171.39	16398.7	0.928005	80	73.9782
460	An'shun	2006	0	3	2	2	23.7112	475.38	5586.92	0.597482	0	13.6794
461	Kunming	2006	0	3	1	3	44.7751	565.2	24940.1	0.932403	73.5	157.531
462	Qujing	2006	1	3	2	2	20.7942	428.65	22700.6	1.91897	66.93	48.1749
463	Yuxi	2006	0	3	2	1	8.47799	405.18	46713.1	2.95396	43.25	45.1327
464	Baoshan	2006	0	3	2	2	29.5408	172.3	5911.53	0.724467	25	17.7554
465	Zhaotong	2006	0	3	2	2	22.6306	351.79	7569.26	1.26053	7.42	16.3452
466	Lijiang	2006	0	3	2	1	45.8629	118.96	14747.1	0.496118	61.63	66.9123
467	Simao	2006	0	3	2	1	37.1624	53.26	9138.52	0.692877	30	41.3958
468	Lincang	2006	0	3	2	1	36.5345	107.09	4877.57	0.473674	0	18.9437
469	Xi'an	2006	1	2	1	3	25.0884	1510.25	21925.5	0.778186	60.1	54.5723
470	Tongchuan	2006	0	2	2	2	34.3689	312.55	9440.6	1.49443	60	31.9149
471	Baoji	2006	0	2	2	2	25.6508	216.51	32068.3	1.90482	70.07	81.6619
472	Xianyang	2006	0	2	2	2	153.884	1658.63	20356.4	1.52279	47.68	310.056
473	Weinan	2006	0	2	2	2	30.2038	763.06	6142.73	0.991262	62.5	17.6344
474	Yan'an	2006	0	2	2	1	10.3298	118.56	31521.3	6.30879	32.4	31.333
475	Hanzhong	2006	0	2	2	2	40.1036	962.59	9159.57	0.864187	76.8	36.5845
476	Yulin	2006	1	2	2	1	13.1547	67.02	12221.6	1.01179	0	16.0677
477	Ankang	2006	0	2	2	2	58.1982	264.08	5968.97	0.560976	81.88	31.8508
478	Shangluo	2006	0	2	2	2	42.6609	206.47	4036.35	1.07185	0	17.2195
479	Lanzhou	2006	0	2	1	3	41.6856	1248.77	25322	0.951587	58.19	105.186
480	Jiayuguang	2006	0	1	2	1	96.3362	60	45679.8	4.47944	74.42	484.043
481	Jinchang	2006	0	1	2	1	16.3677	70.06	55289.7	7.93926	75.65	90.0709
482	Baiyin	2006	0	1	2	1	97.5766	137.67	21833.2	2.31342	24.33	212.281
483	Tianshui	2006	0	2	2	3	29.5947	210.89	7153.36	1.03817	39.65	21.0841
484	Wuwei	2006	0	1	2	2	12.1207	194.76	9857.4	0.964667	68.36	11.924
485	Zhangye	2006	1	1	2	2	21.3662	119.48	10191.9	0.839299	35	21.6739
486	Pingliang	2006	0	2	2	1	11.92	253.15	8610.76	0.929976	10	10.2224
487	Jiuquan	2006	0	1	2	1	55.3961	104.11	11111.2	0.540033	95	61.6738
488	Qingyang	2006	0	2	2	1	27.1783	335.44	11311.2	1.32213	0	30.7692
489	Dingxi	2006	0	1	2	1	22.2648	108.88	3534.53	0.545757	50.66	7.86957
490	Xining	2006	1	2	2	3	66.6754	2766.58	16129.2	0.590296	24.56	106.525
491	Yinchuan	2006	1	2	2	2	44.4952	491.18	26736.5	0.72173	74.03	109.537
492	Shizuishan	2006	1	1	2	1	123.828	197.22	16794.1	2.50415	32.75	242.326
493	Wuzhong	2006	1	2	2	1	60.9769	270.36	8694.76	0.981783	76.83	52.7263
494	Guyuan	2006	1	2	2	1	21.8603	139.82	4177.46	0.352298	0	9.01673
495	Zhongwei	2006	1	2	2	1	10.0131	58.98	9181.9	0.972664	84	9.78821
496	Wulumuqi	2006	0	1	1	3	36.4045	290.87	26062.2	0.615084	67.07	109.575
497	Kelamayi	2006	0	1	1	1	22.8517	33.85	86491.9	9.09017	91.33	301.454
498	Beijing	2007	1	2	1	3	19.3495	937.46	46982.7	0.368356	69.56	122.02
499	Tianjin	2007	1	2	1	3	19.3177	1062.78	38839.6	1.41289	78.21	87.4076
500	Tangshan	2007	0	2	1	3	18.8611	2468.29	34925.5	1.61519	84.44	65.6094
501	Qinhuangdao	2007	0	2	2	2	35.1403	2220.39	39165	0.587156	88.9	135.459
502	Handan	2007	0	2	2	3	60.4077	3355.76	23016	2.06463	51	136.316
503	Xingtai	2007	0	2	2	2	53.2833	4407.58	20058.6	1.89038	75	120.316
504	Baoding	2007	0	2	2	3	40.2403	3400	22876.9	0.810836	65.39	88.9235
505	Zhangjiakou	2007	0	2	2	2	49.4802	2353.72	19772.5	1.61188	69.55	103.164
506	Cangshou	2007	0	2	2	2	28.0928	2787.98	26832.6	0.992294	60	85.9663
507	Langfang	2007	1	2	2	2	25.2115	2708.9	19738.1	1.06394	80	49.2162
508	Hengshui	2007	0	2	2	1	29.5842	1717.58	22526.6	1.40602	77.31	62.2094
509	Taiyuan	2007	1	2	1	3	38.0024	1895.82	33114.4	1.00362	64.93	119.654
510	Datong	2007	0	2	2	3	38.4433	727.93	19219.8	1.24282	72.64	77.6897
511	Yangquan	2007	0	2	2	2	44.2985	979.74	21755.4	1.47043	50.43	96.9945
512	Changzhi	2007	0	2	2	2	61.7902	2041.92	41427.9	1.03961	49.27	124.296
513	Jincheng	2007	0	2	2	1	36.1235	2231.29	19327.7	0.702183	90	67.0122
514	Shuozhou	2007	0	2	2	2	76.6492	138.83	18931.3	2.69493	91.6	159.862
515	Jinzhong	2007	0	2	2	2	26.3199	433.26	13273.7	0.829838	23.93	33.8908
516	Yuncheng	2007	0	2	2	2	25.0859	541.81	8684.18	0.419094	65	22.7524
517	Xinzhou	2007	0	2	2	2	30.2559	261.45	5940.62	0.812359	17.15	18.0046
518	Linfen	2007	0	2	2	2	27.1456	614.74	15447.3	0.950833	31.17	39.3201
519	Lvliang	2007	0	2	2	1	18.4965	198.73	11719.4	1.47813	40	20.218
520	Huhehaote	2007	0	2	1	3	18.9158	557.06	34566.3	0.433397	42.51	89.6609
521	Baotou	2007	1	1	1	3	36.0733	536.9	54466.3	0.971657	81.56	195.248
522	Wuhai	2007	0	1	2	1	126.144	271.95	28389.7	1.97113	54.36	355.493
523	Chifeng	2007	0	2	2	3	23.0542	168.12	14745.5	1.31853	38.71	33.4258
524	Tongliao	2007	0	2	2	2	93.7907	255.95	18735	1.94326	54.65	160.212
525	E'erduosi	2007	0	1	2	1	8.28215	96.21	53560.9	0.660759	46.24	69.8028
526	Hulunbei'er	2007	0	2	2	1	35.5013	182.64	21361.4	0.463006	53.55	75.3612
527	Bayanzhuo'er	2007	0	1	2	2	10.9025	233.86	14319	1.15853	100	15.0954
528	Wulanchabu	2007	0	1	2	1	69.1662	2621.93	14548.2	0.773568	38.97	99.632
529	Shenyang	2007	0	2	1	3	30.7887	1444.52	43924.5	0.988032	72.98	134.572
530	Dalian	2007	1	2	1	3	21.4489	1215.03	52612	1.04051	81.08	126.715
531	Anshan	2007	1	2	1	3	63.9274	2361.38	49328.9	1.55789	15.95	314.598
532	Fushun	2007	0	3	2	3	38.7287	1961.76	23552.4	1.58333	48.78	91.1687
533	Benxi	2007	0	3	2	2	113.98	631.62	27913.1	2.16349	82.73	334.992
534	Jinzhou	2007	0	2	2	2	69.9023	2104.36	25043.6	1.23403	43.13	171.662
535	Yingkou	2007	0	2	2	2	25.093	1245.65	30243.8	1.52816	50.59	75.8933
536	Liaoyang	2007	0	2	2	2	75.6864	1263.24	30451	2.2168	76.9	230.479
537	Panjin	2007	0	2	2	2	27.6502	2234.59	52991.9	4.97346	35.97	145.441
538	Tieling	2007	0	2	2	1	49.4447	675.27	17370.5	1.90399	72.54	85.8876
539	Huludao	2007	0	2	2	2	17.5674	424.12	21497.9	1.99842	54.95	37.7703
540	Changchun	2007	0	2	1	3	24.7703	513.07	33180.5	1.42991	48.48	79.9682
541	Jilin	2007	0	3	2	3	66.1792	747.82	23379.4	1.37852	45.48	153.944
542	Siping	2007	1	2	2	2	25.7809	818.78	13413.5	1.25984	31.36	33.4049
543	Liaoyuan	2007	0	2	2	1	17.3646	1092.68	20611.2	1.48776	19.51	35.7906
544	Songyuan	2007	0	2	2	2	23.5968	484.64	32533.4	3.29052	18.32	76.2709
545	Ha'erbin	2007	0	3	1	3	28.2287	671.01	29511.3	0.744729	50.52	83.0655
546	Qiqiha'er	2007	0	2	2	3	33.3668	326.96	13875.5	0.782414	39.7	46.3075
547	Daqing	2007	1	2	1	3	30.2042	251.01	108105	7.80568	79.53	322.958
548	Jiamusi	2007	0	3	2	2	66.6018	768.25	16589.9	0.447219	48.19	109.72
549	Mudanjiang	2007	0	3	2	2	66.6837	592.89	12417.2	0.78356	18.58	83.7828
550	Shanghai	2007	1	3	1	3	36.7164	2539.57	53275.4	0.882989	73.1	264.346
551	Nanjing	2007	1	3	1	3	58.4024	1131.46	43139.6	0.964143	55	249.645
552	Wuxi	2007	0	3	1	3	20.3745	1453.6	69978	1.2872	74.1	141.489
553	Xuzhou	2007	1	2	1	3	16.9276	1576.98	37302.7	1.44329	85.9	62.9148
554	Changzhou	2007	0	3	1	3	31.3986	1200.43	48100.3	1.66168	65.1	150.276
555	Suzhou	2007	0	3	1	3	26.1994	1426.12	74700.7	1.48546	87.2	193.574
556	Nantong	2007	0	3	2	2	27.0384	2457.75	48087.4	1.47626	76	129.559
557	Lianyungang	2007	0	2	2	2	42.023	758.85	29193.3	1.32344	62.7	122.163
558	huai'an	2007	0	2	2	3	16.5025	872.03	13054.1	1.36875	84.5	21.5427
559	Yancheng	2007	0	2	2	3	20.5096	852.04	18877.4	1.34294	75	37.983
560	Yangzhou	2007	0	3	2	3	23.3353	1204.69	38909.2	1.46556	57.6	90.327
561	Zhenjiang	2007	0	3	2	3	37.978	950.28	39428.8	1.63141	41.7	149.669
562	Taizhou	2007	0	2	2	2	19.8158	1458.33	38209.3	2.30064	58	75.4286
563	Suqian	2007	0	2	2	3	17.7927	743.5	9958.33	2.00628	64.8	17.6418
564	Hangzhou	2007	0	3	1	3	26.7684	1367.34	46672.9	0.955729	80.67	159.125
565	Ningbo	2007	0	3	1	3	27.198	886.23	67955.3	1.16799	75.61	183.817
566	Wenzhou	2007	0	3	1	3	35.8411	1199.33	49580.8	1.13021	29.96	176.581
567	Jiaxing	2007	0	3	2	2	23.0188	846.9	37900.9	1.33039	67.44	86.9358
568	Huzhou	2007	0	3	2	3	25.1789	692.27	29226.9	1.59174	80.39	73.5264
569	Shaoxing	2007	0	3	2	2	35.8995	1795.3	40672.6	1.13592	78.14	145.899
570	Jinhua	2007	0	3	2	2	23.8484	451.32	23444	1.06711	69.48	56.0542
571	Quzhou	2007	0	3	2	2	77.1199	345.99	19023.6	1.31769	53.47	142.659
572	Zhoushan	2007	0	3	2	2	18.6233	675.58	32486.9	0.876866	60.54	60.3888
573	Taizhou	2007	0	3	1	3	26.2009	986.72	32146.3	1.16356	56.42	83.848
574	Lishui	2007	0	3	2	1	32.0149	253	23500.6	0.835134	37.95	75
575	Hefei	2007	0	2	1	3	30.9545	2364.6	41678.3	0.96015	99.16	124.406
576	Wuhu	2007	0	3	2	3	39.8117	1462.22	31328	1.53798	70.1	124.155
577	Bengbu	2007	0	2	2	2	36.7275	1532.61	17066.6	1.05131	46.39	63.0116
578	Huainan	2007	0	3	2	3	70.6545	980.96	12337.4	1.35113	19.74	82.1256
579	Ma'anshan	2007	0	3	2	2	202.872	1836.18	55395.7	2.30621	73.66	1117.81
580	Huaibei	2007	1	2	2	3	28.1855	1426.13	15011	1.86221	82.8	42.1278
581	Tongling	2007	0	3	2	1	94.7517	1254.57	44414.2	2.37611	71.79	420.815
582	Anqing	2007	0	3	2	2	43.4896	902.56	19606.3	0.961084	76.85	85.0472
583	Huangshan	2007	0	3	2	1	31.9985	184.42	17312.5	0.607512	61.78	55.1053
584	Chuzhou	2007	0	3	2	2	30.6688	375.64	16080.4	1.11145	5.28	52.8062
585	Fuyang	2007	0	2	2	3	51.0341	1073.05	5950.38	0.869185	62.75	30.3634
586	Suzhou	2007	0	2	2	3	45.1895	622.35	7050.17	0.791853	39.69	31.6937
587	Lu'an	2007	0	2	2	3	122.463	510.08	4091.71	0.662227	65.31	48.1615
588	Bozhou	2007	0	2	2	3	24.3352	680.64	6081.14	0.836516	44.3	14.5865
589	Chizhou	2007	0	3	2	2	33.5286	267.27	9796.14	1.26938	38.69	32.6923
590	Fuzhou	2007	0	3	1	3	34.4603	1782.55	26804.6	0.705274	73.76	134.144
591	Xiamen	2007	0	3	1	3	26.9654	1063.19	42486.3	1.16524	84.71	169.206
592	Putian	2007	1	3	2	3	17.3824	906.48	16257.1	1.86429	59.56	26.507
593	Sanming	2007	0	3	2	1	74.8592	240.32	24966.4	1.69767	49.52	255.493
594	Quanzhou	2007	0	3	2	3	27.4121	1205.06	28397.8	1.32256	83	98.7601
595	Zhangzhou	2007	0	3	2	2	24.7306	1384.79	28195.2	0.999585	73.46	74.0861
596	Nanping	2007	0	3	2	1	58.7357	183.61	18173.2	1.53885	42.63	109.603
597	Longyan	2007	0	3	2	1	25.9006	176.89	30003.9	2.01817	42.61	94.3635
598	Nanchang	2007	0	3	1	3	43.4894	3634.52	30864.7	1.01137	81.44	148.138
599	Jingdezhen	2007	0	3	2	1	58.6221	1065.64	26126.3	1.46889	1.3	153.258
600	Jiujiang	2007	0	3	2	2	136.963	1008.36	11309.8	1.1892	36.69	425.423
601	Xinyu	2007	0	3	2	2	43.1684	459.42	22076.6	2.24389	56.1	97.1651
602	Yingtan	2007	0	3	2	1	50.3652	1503.65	17370.5	0.637445	80	85.8738
603	Ji'an	2007	0	3	2	2	52.2925	387.33	19261.8	1.01602	15.74	51.5984
604	Yichun	2007	0	3	2	3	46.1715	403.4	6193.9	1.08606	65.01	28.4316
605	Fuzhou	2007	0	3	2	3	79.7198	500.47	8777.06	1.35094	57.03	69.8211
606	Shangrao	2007	0	3	2	1	57.2016	1134.22	15809.4	0.896656	67.4	83.0689
607	Ji'nan	2007	0	2	1	3	22.9085	1082.93	42243.2	0.780519	55.1	96.7168
608	Qingdao	2007	0	2	1	3	19.3482	1964.01	59638.9	1.15002	71.69	114.437
609	Zibo	2007	1	2	1	3	19.7903	934.18	42965.7	2.03764	81.46	84.8225
610	Zaozhuang	2007	0	2	2	3	17.6405	702.02	19147.8	2.46163	62.26	32.5412
611	Dongying	2007	0	2	1	2	14.7119	251.24	93723	3.66179	77.87	161.612
612	Yantai	2007	0	2	1	3	10.7101	660.34	50519.6	1.64026	82.78	53.9414
613	Weifang	2007	0	2	2	3	21.4082	770.85	27226.8	1.48602	84.77	55.178
614	Ji'ning	2007	0	2	2	3	33.109	1045.64	28115.4	1.68084	83.89	93.0864
615	Tai'an	2007	0	2	2	3	25.3313	768.09	21164.3	0.674188	78.34	53.7118
616	Weihai	2007	0	2	2	2	18.852	821.72	53648.8	1.81104	83.56	100.174
617	Rizhao	2007	0	2	2	3	21.4999	637.18	24663.1	1.63064	72.03	53.0897
618	Laiwu	2007	0	2	2	3	21.4365	558.1	22109.3	2.37433	86	47.866
619	Linyi	2007	0	2	2	3	22.1117	1112.21	24235.5	1.8058	88.46	52.3486
620	Dezhou	2007	1	2	2	2	22.1273	1101.86	36356	1.44722	53.32	80.3166
621	Liaocheng	2007	0	2	2	3	31.4679	832.22	12333.1	1.31781	73.86	38.7505
622	Binzhou	2007	0	2	2	2	24.1937	605.66	26212.4	1.65869	37.01	63.3972
623	Heze	2007	0	2	2	3	68.7953	1017.77	6990.74	1.12748	76.97	47.0661
624	Zhengzhou	2007	1	2	1	3	35.7083	2669.21	27077.3	0.478086	92.37	103.605
625	Kaifeng	2007	0	2	2	2	64.8199	2326.8	11284.3	0.853168	26.23	79.1998
626	Luoyang	2007	0	2	2	3	45.7051	2852.21	25959.9	1.20844	78.35	123.917
627	Pingdingshan	2007	0	2	2	2	39.0247	2162.53	20553.4	2.92937	79.69	85.3315
628	Anyang	2007	0	2	2	3	65.4478	1945.4	17931.8	2.27145	55.11	115.289
629	Hebi	2007	0	2	2	2	37.5502	901.81	18287.2	1.89834	75.07	71.4494
630	Xinxiang	2007	0	2	2	3	47.4829	2895.09	18120.2	1.18783	70	88.849
631	Jiaozuo	2007	0	2	2	2	58.8098	1944.81	14753.4	1.55346	60.45	91.2685
632	Puyang	2007	0	2	2	2	28.1269	2471.92	26425.1	3.0698	40.95	74.4204
633	Xuchang	2007	0	2	2	1	51.7903	4170.1	18725.1	2.75842	80.27	101.434
634	Luohe	2007	0	2	2	3	52.7556	1322.55	14411.6	3.10657	39.39	81.0007
635	Sanmengxia	2007	0	2	2	1	28.066	1453.54	21805.9	2.16624	99.45	66.2265
636	Nanyang	2007	0	2	2	3	28.9179	906.92	12545.2	1.25848	47.92	35.005
637	Shangqiu	2007	0	2	2	3	34.3191	1044	7900.69	1.07436	84.02	27.6281
638	Xinyang	2007	0	2	2	3	25.2497	393.51	9796.92	1.20803	66.75	25.8215
639	Zhoukou	2007	0	2	2	2	32.9664	3433.11	10871.7	0.789443	73	37.3745
640	Zhumadian	2007	0	2	2	2	34.386	815.16	13922.7	1.41066	90.06	50.0874
641	Wuhan	2007	0	3	1	3	45.0716	1877.63	34977.7	0.865838	81.77	184.589
642	Huangshi	2007	0	3	2	2	81.1158	2686.92	27204.6	1.23035	74.3	249.937
643	Shiyan	2007	0	3	2	2	65.9275	437.72	37518.3	1.26369	53.52	249.138
644	Yichang	2007	0	3	2	3	30.4326	291.83	25309	2.0124	82.19	82.8184
645	Xiangfan	2007	1	3	2	3	71.7495	594.47	17359.2	1.22279	40	120.207
646	Ezhou	2007	0	3	2	3	163.083	711.5	15633.3	1.58346	59.57	245.398
647	Jingmen	2007	1	3	2	2	57.1246	305.34	19319.7	1.056	27.44	110.213
648	Xiaogang	2007	0	3	2	2	40.3283	987.53	7340.26	1.12219	15.21	31.2674
649	Jingzhou	2007	0	3	2	3	83.4919	714.09	11779.6	1.1768	22.48	97.6186
650	Huanggang	2007	0	3	2	1	87.6569	1044.48	11074.4	1.0993	71.97	103.607
651	Xianning	2007	0	3	2	2	58.796	396.13	9833.81	1.48984	10	60.2491
652	Suizhou	2007	0	3	2	3	36.0488	230.85	9412.56	1.36911	40.1	29.5587
653	Changsha	2007	0	3	1	3	32.4775	3934.35	41174.1	0.521211	70.85	150.126
654	Zhuzhou	2007	0	3	2	2	61.37	1481.01	31030.8	1.67599	67.91	228.316
655	Xiangtan	2007	0	3	2	2	30.6002	3096.77	28244.9	1.4059	51.23	81.6088
656	Hengyang	2007	0	3	2	3	141.673	1817.77	16119.8	1.05042	22.67	216.286
657	Yueyang	2007	1	3	2	2	51.6996	638.76	29585.3	1.59642	36	211.434
658	Changde	2007	0	3	2	3	26.026	511.24	21139.7	1.61987	38.26	58.2041
659	Zhangjiajie	2007	0	3	2	1	39.9441	176.79	13567.5	0.290006	56.56	51.4368
660	Yiyang	2007	0	3	2	3	33.0762	677.67	10938	0.878005	66.27	32.5173
661	Chenzhou	2007	0	3	2	2	58.3749	293.86	18696.3	1.36541	16.08	123.591
662	Yongzhou	2007	0	3	2	3	89.4218	341.14	11468.1	0.738634	21.22	94.916
663	Huaihua	2007	0	3	2	1	71.5606	437.52	16973	0.419605	18.01	145.772
664	Guangzhou	2007	0	3	1	3	35.7717	1656.93	58035.9	0.628122	74.15	280.811
665	Shaoguan	2007	0	3	2	2	30.5257	317.77	21885	1.24734	88.6	63.9254
666	Shenzhen	2007	1	3	1	3	29.8063	1087.46	60591.3	1.00441	70.45	726.198
667	Zhuhai	2007	0	3	1	2	44.503	567.22	46934	1.31798	72.68	316.982
668	Shantou	2007	0	3	1	3	46.2209	2523.42	13060.9	1.27463	23.89	60.1361
669	Foshan	2007	0	3	1	3	24.6852	938.36	46558.2	1.94781	47.53	187.501
670	Jiangmen	2007	0	3	2	3	53.8185	745.76	28741	1.61812	47.78	182.328
671	Zhanjiang	2007	0	3	2	3	25.6409	859.48	26648.2	2.01452	29.42	66.3194
672	Maoming	2007	0	3	2	3	44.174	1446.8	24578.9	1.79012	30.06	99.2329
673	Zhaoqing	2007	0	3	2	2	62.0264	686.47	27155.6	0.80242	66.29	190.295
674	Huizhou	2007	0	3	1	3	34.1758	457.63	31224.9	1.87341	47.19	152.077
675	Meizhou	2007	0	3	2	1	67.3136	965.22	21839.4	1.72075	34.68	145.946
676	Heyuan	2007	0	3	2	1	103.635	645.78	21390.5	1.3544	61.87	238.162
677	Yangjiang	2007	0	3	2	2	44.7961	993.62	18280.5	0.825493	30	80.7892
678	Qingyuan	2007	0	3	2	2	35.3969	598.6	25683.5	2.44529	17.75	98.0717
679	Dongguang	2007	0	3	1	3	72.6411	694.77	35015.8	1.32757	87.93	1017.07
680	Zhongshan	2007	0	3	1	3	8.02451	806.39	37648.9	1.68653	80.11	52.0703
681	Chaozhou	2007	0	3	2	1	103.601	2283.55	17403.3	1.08889	25.53	200.086
682	Nanning	2007	0	3	1	3	49.9837	400.94	22841.4	0.60911	28.91	113.092
683	Liuzhou	2007	0	3	2	3	123.2	1547.72	38568.7	2.06586	52.92	472.319
684	Guilin	2007	0	3	2	2	62.8132	1339.65	24680	0.7954	67.16	153.732
685	Wuzhou	2007	0	3	2	1	79.4474	448.77	18996.8	1.05403	20	150.457
686	Beihai	2007	1	3	2	2	69.6699	607.52	20118	0.974066	27.23	140.162
687	Baise	2007	0	3	2	1	117.616	91.03	19730.2	1.60287	10.85	231.573
688	Hechi	2007	0	3	2	1	135.803	137.48	15026	1.60908	54.06	202.735
689	Haikou	2007	0	3	2	3	55.031	663.51	17118.9	0.434575	85.2	109.684
690	Sanya	2007	1	3	2	2	63.8168	279.48	20452.2	0.931578	68.89	112.93
691	Chongqing	2007	0	3	1	3	30.649	586.01	15451.4	1.0467	68.1	45.5407
692	Chengdu	2007	0	3	1	3	32.241	2310.25	25289.7	0.793065	81.19	103.692
693	Zigong	2007	0	2	2	3	21.5937	1032.13	14372.2	1.61255	72.44	28.9112
694	Panzhihua	2007	0	3	2	2	48.1398	340.19	27865.7	2.81761	27.07	146.846
695	Luzhou	2007	0	3	2	3	46.793	674.95	11919.1	1.48355	58.11	52.5226
696	Deyang	2007	1	3	2	2	36.9444	1002.62	18500.9	1.84244	31.68	69.4013
697	Mianyang	2007	1	3	2	3	31.2305	757.64	19108.3	1.49631	47.28	61.3115
698	Guangyuan	2007	0	3	2	2	71.6162	200.15	6805.08	1.09098	64.02	56.2888
699	Suining	2007	0	3	2	3	27.1468	801.17	6643.55	1.24785	44.37	17.2281
700	Neijiang	2007	0	3	2	3	33.0985	896.3	8400.28	1.45975	22.87	25.7342
701	Leshan	2007	0	3	2	3	28.168	458.04	13661.2	2.34548	34.41	39.4095
702	Nanchong	2007	0	3	2	3	46.9728	757.14	7424.92	1.27836	22.74	34.8874
703	Meishan	2007	0	3	2	2	32.616	631.78	11024.2	1.96078	38	32.7744
704	Yibin	2007	0	3	2	2	31.0233	704.45	22343.5	2.91535	2.54	69.3212
705	Guang'an	2007	0	3	2	3	30.6876	815.17	7248.71	1.10819	31.7	18.6087
706	Dazhou	2007	0	3	2	1	61.5493	905.32	12523.5	1.5797	23.8	84.1048
707	Ya'an	2007	0	3	2	1	70.2814	328.04	10223.5	0.989339	66	80
708	Bazhong	2007	0	3	2	3	39.6476	519.45	4773.99	0.505842	42.99	15.7251
709	Guiyang	2007	0	3	2	3	56.1119	890.52	21370.6	0.84564	36.05	112.738
710	Liupanshui	2007	0	3	2	1	48.1289	1013.13	20373.7	1.34127	44.17	88.6695
711	Zunyi	2007	0	3	2	2	60.1938	635.87	17249.7	0.970441	42.96	109.692
712	Kunming	2007	0	3	1	3	30.6686	568.79	24776.9	0.815882	59.56	109.45
713	Qujing	2007	1	3	2	2	32.0097	437.54	23797.4	1.99091	31.64	77.0272
714	Yuxi	2007	0	3	2	1	8.49524	409.96	49665	3.54858	88.91	47.5219
715	Baoshan	2007	0	3	2	2	38.0214	174.12	6447.82	0.781447	33.55	24.7564
716	Lijiang	2007	0	3	2	1	43.4249	121.91	13620.1	0.520552	58.56	65.9477
717	Simao	2007	0	3	2	1	32.2974	54.23	10296.5	0.789238	88	39.9531
718	Xi'an	2007	1	2	1	3	32.0457	1533.19	16104.4	1.04432	62.3	60.0138
719	Tongchuan	2007	0	2	2	2	32.4994	313.34	9484.11	1.65781	46	32.0997
720	Baoji	2007	0	2	2	2	23.6845	243.17	34121.9	2.06777	75	71.9825
721	Xianyang	2007	0	2	2	2	128.618	1669.26	20577.3	1.4507	43.8	261.123
722	Weinan	2007	0	2	2	2	44.5239	773.05	7799.25	1.17741	40.9	33.7642
723	Yan'an	2007	0	2	2	1	14.8067	121.51	22192.5	3.2805	44.88	31.1039
724	Hanzhong	2007	0	2	2	2	39.1828	979.14	9066.38	0.816171	72.77	35.5437
725	Ankang	2007	0	2	2	2	66.3226	268.72	6161.58	0.594088	43.98	36.8566
726	Lanzhou	2007	0	2	1	3	47.5029	1263.08	24652.9	0.870888	60.28	115.671
727	Jiayuguang	2007	0	1	2	1	94.3189	61.81	47004.1	4.75189	75.2	499.063
728	Jinchang	2007	0	1	2	1	40.4458	70.85	70229.9	10.4971	79.91	282.141
729	Baiyin	2007	0	1	2	1	91.5286	139.74	22673.1	2.45986	38.94	205.988
730	Tianshui	2007	0	2	2	3	39.1268	212.27	7586.98	0.979375	49.43	28.8723
731	Wuwei	2007	0	1	2	2	16.9553	196.52	10161	1.02025	87.46	17.1257
732	Zhangye	2007	1	1	2	2	21.6669	120.87	10660.9	0.904713	81.4	22.4976
733	Pingliang	2007	0	2	2	1	11.8822	254.65	8771.35	0.908993	22	10.2434
734	Jiuquan	2007	0	1	2	1	62.2823	106.23	11382.9	0.580712	95	71.1704
735	Dingxi	2007	0	1	2	1	24.3018	110.06	3541.12	0.563035	46.67	8.55914
736	Xining	2007	1	2	2	3	63.8243	2820.26	17025.9	0.691625	39.96	108.668
737	Yinchuan	2007	1	2	2	2	40.4959	372.48	30015.1	0.738346	82.23	105.239
738	Shizuishan	2007	1	1	2	1	87.0443	174.77	21519.9	2.86129	77.1	196.853
739	Wuzhong	2007	1	2	2	1	76.8205	276.6	7906.28	1.13711	66.77	69.6703
740	Guyuan	2007	1	2	2	2	25.3442	143.24	4301.93	0.299815	72.7	10.7726
741	Zhongwei	2007	1	2	2	1	11.0538	60.48	10426.5	1.02534	89	10.0474
742	Wulumuqi	2007	0	1	1	3	44.7237	223.31	25538.4	0.651292	58.22	130.786
743	Kelamayi	2007	0	1	2	1	17.744	36.78	79441.5	9.03125	93.08	207.675
744	Beijing	2008	1	2	1	3	19.227	950.81	46614.4	0.346875	74.52	122.985
745	Tianjin	2008	1	2	1	3	17.8187	1072.92	38686	1.58558	79	86.3198
746	Shijiazhuag	2008	1	2	1	3	27.7599	5278.95	33807.7	0.574054	77	93.266
747	Tangshan	2008	0	2	1	3	15.6157	2483.98	41349.2	1.60849	90.61	65.604
748	Qinhuangdao	2008	0	2	2	2	33.0852	2253.72	35888.2	0.623274	89	135.631
749	Handan	2008	1	2	2	3	49.069	3379.49	25416.3	1.89883	77	116.043
750	Xingtai	2008	0	2	2	2	44.3806	4429.55	23344.4	1.87348	81	117.496
751	Baoding	2008	0	2	2	3	32.0434	3382.37	27013.2	1.31109	81	84.3173
752	Zhangjiakou	2008	0	2	2	2	45.8998	2369.41	21687.1	1.50473	76	104.894
753	Chengde	2008	0	2	2	2	46.9884	997.33	25218.2	1.97178	56.04	115.011
754	Cangshou	2008	0	2	2	2	26.0071	2844.81	28865.1	1.25269	77	86.4964
755	Langfang	2008	1	2	2	2	23.43	2742.12	20676.7	0.964354	83.01	48.8323
756	Hengshui	2008	0	2	2	1	29.3458	1126.74	21677.2	1.38137	87	100.065
757	Taiyuan	2008	1	2	1	3	29.944	1926.64	34997.7	0.930593	68.6	98.4144
758	Datong	2008	0	2	2	3	34.2663	737.36	20296.7	1.22817	77.58	72.4718
759	Yangquan	2008	0	2	2	2	49.6692	1044.85	19991.4	1.62857	65	105.351
760	Changzhi	2008	0	2	2	2	58.5655	2080.84	21314.7	1.08063	49.27	121.871
761	Jincheng	2008	1	2	2	1	24.9359	2499.32	22869.8	0.527239	94.97	49.1562
762	Shuozhou	2008	0	2	2	2	27.3079	140.5	67252.7	2.66996	94.24	70.8432
763	Jinzhong	2008	0	2	2	2	43.1174	444.7	13859.2	0.728042	35.49	56.6724
764	Yuncheng	2008	0	2	2	2	28.7465	546.55	10163.5	0.418185	75	28.1369
765	Xinzhou	2008	0	2	2	2	54.8233	264.08	6836.81	0.865781	36	37.4092
766	Linfen	2008	0	2	2	2	21.1767	624.85	15965.8	0.803889	29.03	31.3754
767	Lvliang	2008	0	2	2	1	29.3628	201.64	15330.5	1.66667	42	41.6296
768	Huhehaote	2008	1	2	1	3	17.4369	568.16	34772.7	0.425956	41.37	82.2793
769	Baotou	2008	1	1	1	3	30.2359	542.11	47663.8	0.973453	81.55	173.558
770	Wuhai	2008	0	1	2	1	117.175	275.2	30199	2.02479	64.49	351.771
771	Chifeng	2008	0	2	2	3	30.8304	169.99	15469.5	1.43789	35.33	47.4314
772	Tongliao	2008	0	2	2	2	120.597	291.67	21176.6	2.22073	55.81	230.603
773	E'erduosi	2008	1	1	2	1	7.21785	98.14	57552.3	0.657667	53.47	68.4253
774	Hulunbei'er	2008	0	2	2	1	23.9144	184.72	24035	0.598654	59.98	55.5263
775	Bayanzhuo'er	2008	0	1	2	2	12.3134	236.92	14468.8	1.26951	100	17.0701
776	Wulanchabu	2008	0	1	2	1	67.287	2025.5	12209.7	0.823397	45.07	102.584
777	Shenyang	2008	0	2	1	3	29.5938	1466.49	45134.6	1.02809	76.6	133.57
778	Dalian	2008	1	2	1	3	21.026	1235.24	56687.8	1.07658	87.18	132.654
779	Anshan	2008	1	2	1	3	60.8823	2361.22	52368	1.44695	29.25	318.827
780	Fushun	2008	0	3	2	3	50.7931	1955.18	24789.2	1.63147	56.88	126.125
781	Benxi	2008	0	3	2	2	103.338	630.63	32856	2.33129	83.55	339.779
782	Jinzhou	2008	0	2	2	2	59.5869	2129.82	26527	1.1601	51.5	156.903
783	Yingkou	2008	0	2	2	2	24.4399	1259.91	32665.3	1.63972	51	79.3818
784	Liaoyang	2008	1	2	2	2	72.9934	1265.16	31479.2	1.99092	79.64	229.592
785	Panjin	2008	0	2	2	2	27.8743	2259.4	52018.6	5.33248	53.58	143.827
786	Tieling	2008	0	2	2	1	52.3104	676.78	15528.9	2.10421	83.51	87.9596
787	Chaoyang	2008	0	2	2	2	31.6667	539.96	17806.8	1.12921	40.3	51.4532
788	Huludao	2008	0	2	2	2	24.1114	427.29	19761.8	1.82271	87.2	47.1623
789	Changchun	2008	1	2	1	3	23.1504	689.54	33913.3	1.43231	74.01	85.4703
790	Jilin	2008	0	3	2	3	63.2062	508.61	24717	1.2356	80.07	156.227
791	Siping	2008	1	2	2	2	21.0451	821.73	14149.3	1.45751	42.47	33.2895
792	Liaoyuan	2008	1	2	2	1	27.8299	1079.86	22470.7	1.47426	21.51	62.5393
793	Songyuan	2008	0	2	2	2	23.5173	542.5	32836.9	2.9576	55.64	75.1889
794	Ha'erbin	2008	1	3	1	3	27.2289	670.52	30884	0.755614	62.26	84.1559
795	Qiqiha'er	2008	0	2	2	3	34.1075	326.44	14783.4	0.84097	47.47	50.4667
796	Daqing	2008	1	2	1	3	20.0944	256	114988	6.60737	85.49	210.425
797	Jiamusi	2008	0	3	2	2	51.7281	439.47	17202.7	0.456656	60.13	88.9806
798	Mudanjiang	2008	0	3	2	2	439.064	340.33	11938.7	0.827606	37.19	551.725
799	Shanghai	2008	1	3	1	3	36.1927	2563.92	53443.8	0.845039	85.81	264.418
800	Nanjing	2008	1	3	1	3	45.2153	1145.97	43232.6	0.895133	86	194.239
801	Wuxi	2008	0	3	1	3	22.0642	1462.85	69022.7	1.19213	90.1	151.811
802	Xuzhou	2008	1	2	1	3	23.0484	1589.66	38163.1	1.43758	80.8	87.6085
803	Changzhou	2008	0	3	1	3	25.9608	1206.57	49817	1.59018	86.2	129.003
804	Suzhou	2008	0	3	1	3	23.1934	1443.7	77439	1.32544	88.9	178.506
805	Nantong	2008	1	3	2	2	40.2336	2465.35	46933.5	1.42208	85.9	188.528
806	Lianyungang	2008	0	2	2	2	43.4012	699.65	27315.1	1.31472	79.3	111.721
807	huai'an	2008	0	2	2	3	20.0713	876.51	13495.3	1.3739	81	27.0166
808	Yancheng	2008	0	2	2	3	13.4892	869.28	19308.8	1.40424	80.8	25.7877
809	Yangzhou	2008	0	3	1	3	21.7908	1189.26	40537.3	1.44253	86	86.9847
810	Zhenjiang	2008	0	3	2	3	36.7887	950.18	41308.9	1.59963	77.7	151.979
811	Taizhou	2008	1	2	2	2	17.2573	1260.16	37421.8	2.0972	81.4	58.2145
812	Suqian	2008	0	2	2	3	16.3218	749.53	10492.5	1.84936	78.7	17.057
813	Hangzhou	2008	0	3	1	3	25.8824	1382.99	62434.7	0.935312	83.24	160.683
814	Ningbo	2008	0	3	1	3	26.1857	894.07	71421.2	1.18722	79.69	186.203
815	Wenzhou	2008	0	3	1	3	36.5144	1211.63	49463.2	1.07082	49.16	179.078
816	Jiaxing	2008	0	3	2	2	19.839	852.79	29634.7	1.29022	79.95	76.6081
817	Huzhou	2008	0	3	2	3	23.5346	692.53	30704.6	1.59994	82.27	72.2263
818	Shaoxing	2008	0	3	2	2	38.3835	1792.82	40943.2	1.07083	76.51	157.257
819	Jinhua	2008	0	3	2	2	22.2637	451.96	24275.9	1.06162	74.69	54.0052
820	Quzhou	2008	0	3	2	2	62.8652	347.62	20349.2	1.4218	61.03	127.618
821	Zhoushan	2008	0	3	2	2	16.5677	676.85	35017.8	0.961832	40.94	57.9621
822	Taizhou	2008	0	3	1	3	23.7248	994.47	32663.8	1.10783	65.83	77.1915
823	Lishui	2008	0	3	2	1	38.3024	254.79	22348	0.837265	43.2	92.9449
824	Hefei	2008	1	2	1	3	30.5219	2425.27	42115.8	1.03399	75.56	126.941
825	Wuhu	2008	0	3	2	3	34.9869	1466.39	35318.6	1.72841	70.1	123.395
826	Bengbu	2008	0	2	2	2	33.9402	1539.27	17985.3	1.07152	67.18	60.9123
827	Huainan	2008	0	3	2	3	38.9072	985.87	13445.8	1.70616	26.94	52.0545
828	Ma'anshan	2008	0	3	2	2	155.349	1855.29	56532.6	2.70328	81.4	873.732
829	Huaibei	2008	1	2	2	3	24.6253	1437.4	17324.4	2.21719	73.83	42.7201
830	Tongling	2008	0	3	2	1	93.8704	1259.43	42680.7	2.16369	71.7	399.977
831	Anqing	2008	0	3	2	2	64.6151	904.51	18991.5	0.823182	71.2	122.583
832	Huangshan	2008	0	3	2	1	33.404	185.61	17528.8	0.635775	63.84	58.3621
833	Chuzhou	2008	0	3	2	2	30.6667	376.42	17212.5	1.09937	12.27	52.7342
834	Fuyang	2008	0	2	2	3	49.597	1090.46	5984.97	0.84554	71.5	29.451
835	Suzhou	2008	0	2	2	3	44.597	629.85	7376.58	0.893632	51.71	32.7004
836	Lu'an	2008	0	2	2	3	122.098	513.9	3955.91	0.766095	67.85	52.2294
837	Bozhou	2008	0	2	2	3	23.2441	698.7	6319.23	0.889404	74.85	14.4988
838	Chizhou	2008	0	3	2	2	34.1531	269.04	11231	1.24946	46.04	36.8027
839	Fuzhou	2008	0	3	1	3	33.6765	1789.84	27347.1	0.727431	68.74	134.187
840	Xiamen	2008	0	3	1	3	27.7364	1104.07	41923.3	1.13556	96.45	166.718
841	Putian	2008	1	3	2	3	16.4255	923.42	16647.9	1.99662	61.41	26.0301
842	Sanming	2008	0	3	2	1	59.3282	240.92	28445.1	2.36238	15.35	232.206
843	Quanzhou	2008	1	3	2	3	34.1374	1208.35	29602.8	1.33955	38.95	128.546
844	Zhangzhou	2008	0	3	2	2	23.8766	1361.6	28979.1	1.0702	54.09	75.4212
845	Nanping	2008	0	3	2	1	56.5692	184.77	18981.9	1.60134	16.44	109.563
846	Longyan	2008	0	3	2	1	25.0891	177.74	31769.5	2.1893	43.86	97.0378
847	Ningde	2008	0	3	2	1	28.2854	284.91	14295.8	0.497828	12.78	38.913
848	Nanchang	2008	0	3	1	3	40.5487	3615.72	40971.2	1.25102	86.76	142.646
849	Jingdezhen	2008	1	3	2	1	39.9537	1079.86	25639.6	1.44784	40	105.925
850	Pingxiang	2008	1	3	2	2	30.882	783.24	19527.1	1.99398	71.36	59.9125
851	Jiujiang	2008	0	3	2	2	39.2422	1010.7	40752.8	1.3879	60.06	159.927
852	Xinyu	2008	0	3	2	2	17.8128	509.5	25881.8	2.27916	75.01	45.9462
853	Yingtan	2008	0	3	2	1	44.2881	1495.62	19770.7	0.797463	33	86.9204
854	Ji'an	2008	0	3	2	2	52.2612	386.17	20341.8	0.980347	20.66	54.5659
855	Yichun	2008	0	3	2	3	42.6068	407.7	6528.18	1.08401	84.18	27.6664
856	Fuzhou	2008	0	3	2	3	73.0509	503.68	9696.39	1.69174	58.04	70.5932
857	Shangrao	2008	0	3	2	1	53.883	1150.74	14862	0.94205	81.05	80.082
858	Ji'nan	2008	0	2	1	3	18.6511	1068.75	37204.9	0.714839	70.23	82.0375
859	Qingdao	2008	0	2	1	3	19.0673	1966.19	62111.5	1.02987	83.5	118.281
860	Zibo	2008	1	2	1	3	19.3486	936.6	44922.4	1.93135	86.06	86.8066
861	Zaozhuang	2008	0	2	2	3	17.0602	708.37	20138.2	2.58252	87.53	32.8473
862	Dongying	2008	0	2	1	2	9.18102	252.4	102035	3.91737	73.91	110.368
863	Yantai	2008	0	2	1	3	11.201	659.07	54013.9	1.59801	88.46	60.602
864	Weifang	2008	0	2	2	3	21.3321	863.57	29144.7	1.42494	84.95	54.6279
865	Ji'ning	2008	0	2	2	3	29.6076	1053.31	31038.7	1.73491	91.65	91.8897
866	Tai'an	2008	0	2	2	3	17.3808	766.94	22674	0.670754	76.99	39.4415
867	Weihai	2008	0	2	2	2	17.4004	831.47	53831	1.79971	84.45	93.1185
868	Rizhao	2008	0	2	2	3	16.0671	639.37	30207.3	1.95763	76	48.3665
869	Laiwu	2008	0	2	2	3	16.7816	560.57	24368.8	2.60031	86.02	41.2829
870	Linyi	2008	0	2	1	3	20.7041	1122.71	26385.9	1.80294	89.39	53.0069
871	Dezhou	2008	1	2	2	2	24.4294	1102.97	32975.6	1.64299	67.86	80.5719
872	Liaocheng	2008	0	2	2	3	31.3406	832.93	13077.4	1.34627	70.2	40.967
873	Binzhou	2008	1	2	2	2	25.9542	606.72	24309.7	1.50699	67.88	74.3667
874	Heze	2008	0	2	2	3	59.6617	1038.94	7812.71	1.11081	77.01	46.7587
875	Zhengzhou	2008	1	2	1	3	37.0825	2740.1	31791.1	0.559138	95.8	116.365
876	Kaifeng	2008	0	2	2	2	62.8645	2342.54	13518.1	0.900625	56.2	84.6934
877	Luoyang	2008	1	2	2	3	32.837	2911.03	27061.4	1.11706	94.27	87.9641
878	Pingdingshan	2008	0	2	2	3	37.3596	2194.12	25817.6	3.44475	80.6	95.7601
879	Anyang	2008	1	2	2	3	54.873	1962.32	19335.1	2.49768	66.7	105.639
880	Hebi	2008	0	2	2	2	39.2821	915.11	21594.1	2.18974	68.47	84.2096
881	Xinxiang	2008	0	2	2	3	49.5746	2909.83	18871.1	1.10347	86.04	93.3155
882	Jiaozuo	2008	0	2	2	2	55.4153	1954.72	16585.5	1.77912	61.4	91.6747
883	Puyang	2008	0	2	2	2	26.4854	2536.54	27765	3.20753	75.9	72.6005
884	Xuchang	2008	0	2	2	1	45.2993	4207.22	22357.6	3.10583	80.16	100.833
885	Luohe	2008	0	2	2	3	45.6968	1345.59	16033.7	3.37179	33.41	72.6412
886	Sanmengxia	2008	0	2	2	1	32.0152	1464.14	19637.2	1.50064	92.98	62.6423
887	Nanyang	2008	0	2	2	3	25.6063	919.84	12960.8	1.31693	56	32.9547
888	Shangqiu	2008	0	2	2	3	32.268	1063.88	8414.88	1.12211	83.07	26.9005
889	Xinyang	2008	0	2	2	3	23.8368	398.34	10908	1.23566	80.28	25.8429
890	Zhoukou	2008	0	2	2	2	28.1426	3505.41	12076.3	0.804516	76.39	33.6353
891	Zhumadian	2008	0	2	2	2	34.8244	830.18	15313.8	1.37749	91.89	52.8476
892	Wuhan	2008	1	3	1	3	41.8509	1885.28	37738.6	0.851727	80.7	188.509
893	Huangshi	2008	0	3	2	2	80.9954	2689.03	24308.4	1.30589	75.3	251.075
894	Shiyan	2008	0	3	2	2	63.1255	438.89	35337.6	1.25153	61.8	239.305
895	Yichang	2008	1	3	2	3	29.4018	292.89	24077.7	2.22139	84.33	86.0714
896	Xiangfan	2008	1	3	2	3	72.0898	597.85	18134.8	1.1623	75.02	129.823
897	Ezhou	2008	0	3	2	3	34.3444	710.24	17785.8	1.8469	61.35	59.0152
898	Jingmen	2008	1	3	2	2	67.8033	309.17	20822.2	1.36294	54.44	123.048
899	Xiaogang	2008	0	3	2	2	36.7079	992.18	9027.62	1.09693	18.71	31.1847
900	Jingzhou	2008	0	3	2	3	76.7034	739.78	12739.6	1.20508	35.05	94.5707
901	Huanggang	2008	0	3	2	1	78.368	1039.09	12009.6	1.31532	70.2	105.78
902	Xianning	2008	0	3	2	2	54.7111	396.8	12411.7	1.04195	13.05	62.0632
903	Suizhou	2008	0	3	2	3	41.2211	232.62	9769.21	1.06429	60.6	35.1519
904	Changsha	2008	1	3	1	3	35.2101	2495.5	50666.3	0.80409	70.85	188.259
905	Zhuzhou	2008	1	3	2	2	56.4769	1483.43	32763.1	1.75436	68.5	222.948
906	Xiangtan	2008	1	3	2	2	29.6621	3146.95	31301.5	1.40113	66.27	80.6606
907	Hengyang	2008	0	3	2	3	129.036	1798.08	17565	1.25083	27.33	213.85
908	Shaoyang	2008	0	3	2	2	126.961	1525.92	9480.86	0.944293	40.6	143.74
909	Yueyang	2008	1	3	2	2	49.7318	652.49	30866.8	1.61882	67	208.782
910	Changde	2008	0	3	2	3	22.7693	510.08	25963.8	1.73659	39.74	55.5556
911	Zhangjiajie	2008	0	3	2	2	32.3656	184.28	13826.9	0.2892	47.8	40.837
912	Yiyang	2008	0	3	2	3	30.0658	680.36	11937.5	0.975451	69.3	32.2598
913	Chenzhou	2008	0	3	2	2	55.9928	287.1	18590.5	1.31855	28.21	121.879
914	Yongzhou	2008	0	3	2	3	80.6433	342.93	11963	0.79824	38	88.6921
915	Huaihua	2008	0	3	2	1	65.8526	455.89	17503.6	0.441726	21.48	137.997
916	Loudi	2008	0	3	2	1	38.2611	1045.77	22129.1	1.98071	44.39	87.7666
917	Shaoguan	2008	0	3	2	2	38.6241	318.75	22010.4	1.17068	90	83.1439
918	Shenzhen	2008	1	3	1	3	29.0974	1167.79	62059.6	0.95768	75.03	688.192
919	Zhuhai	2008	0	3	1	2	46.174	584.83	46703.9	1.29023	80.15	318.175
920	Shantou	2008	0	3	1	3	42.1573	2552.66	13485.1	1.35036	30.59	56.455
921	Foshan	2008	0	3	1	3	12.5525	946.83	50424.2	2.03727	72.39	103.159
922	Jiangmen	2008	0	3	1	3	55.9549	751.27	31767.7	1.70321	48.8	201.933
923	Zhanjiang	2008	0	3	2	3	21.5311	716.05	27814.7	2.08584	36.06	70.8266
924	Maoming	2008	0	3	2	3	16.2032	1474.94	20960.1	1.85593	64.82	39.2832
925	Zhaoqing	2008	0	3	2	2	55.62	693.43	27353.1	0.973576	42.25	194.599
926	Huizhou	2008	0	3	1	3	35.7244	471.37	31206.7	1.76732	47.24	157.713
927	Meizhou	2008	0	3	2	1	47.1268	1050	21853.6	1.62805	61	102.972
928	Shanwei	2008	0	3	2	2	39.3224	1246.27	14084.9	1.5969	2.51	52.4362
929	Heyuan	2008	0	3	2	1	72.5885	660.89	22815.4	1.49377	62.87	177.64
930	Yangjiang	2008	0	3	2	2	39.0426	875.79	18922.5	0.867548	42	72.5117
931	Qingyuan	2008	0	3	2	2	35.4611	600.22	28212	2.64359	36.87	110.532
932	Dongguang	2008	1	3	1	3	83.9518	709.41	36818.8	1.12561	63.95	1228.23
933	Zhongshan	2008	0	3	1	3	7.64033	813.5	38768	1.65634	86.99	50.7819
934	Chaozhou	2008	0	3	2	1	67.4647	2249.03	17421	1.1046	30.39	124.785
935	Yunfu	2008	0	3	2	1	42.8929	303.81	17655.2	1.80068	52.08	73.1006
936	Nanning	2008	0	3	1	3	51.7908	407.3	24175.2	0.595543	46.98	125.272
937	Guilin	2008	0	3	2	2	60.9335	1343.72	25204.4	0.822148	84.6	153.359
938	Wuzhou	2008	0	3	2	1	52.0272	453.24	18597.9	1.24497	4.32	96.1987
939	Beihai	2008	1	3	2	2	30.3172	619.75	15176.6	1.19457	58.29	68.6394
940	Yulin	2008	1	3	2	2	33.2504	766.43	11273.3	0.767276	0.24	46.0054
941	Hechi	2008	0	3	2	1	154.628	139.7	10488.8	1.37016	63	205.629
942	Haikou	2008	0	3	2	3	49.4105	676.3	17220.6	0.37951	82.03	99.1015
943	Sanya	2008	1	3	2	2	66.9937	285.01	21558.9	0.783696	76.8	124.918
944	Chongqing	2008	1	3	1	3	24.3666	589.26	16536.8	1.13415	72	38.9684
945	Chengdu	2008	0	3	1	3	30.7648	2344.44	28812	0.892206	84.17	116.558
946	Zigong	2008	1	2	2	3	20.169	1040.96	16116.5	1.78538	72.81	30.3627
947	Panzhihua	2008	0	3	2	2	46.8337	342.77	32375	3.14563	27.76	159.997
948	Luzhou	2008	0	3	2	3	43.5945	678.47	13441.5	1.70513	13.71	55.7207
949	Deyang	2008	1	3	2	2	33.9997	1013.73	20627.4	2.0894	41.97	71.3807
950	Mianyang	2008	1	3	2	3	31.3164	767.2	18397	1.52614	49.69	63.4039
951	Guangyuan	2008	0	3	2	2	32.5378	204.19	8364.59	1.05328	57	25.9503
952	Suining	2008	0	3	2	3	25.869	797.87	7256.47	1.46237	64.71	18.0749
953	Neijiang	2008	0	3	2	3	28.7902	900.32	10044.4	1.75357	36.61	26.3203
954	Leshan	2008	0	3	2	3	23.4767	458.63	13156.4	2.6478	46.85	37.8231
955	Nanchong	2008	0	3	2	3	43.8346	761.77	7876.17	1.35608	42.51	34.7273
956	Meishan	2008	0	3	2	2	30.1827	638.09	12363	1.99161	35.17	32.7211
957	Guang'an	2008	0	3	2	3	27.693	862.11	7977.81	1.22191	33.42	18.6211
958	Dazhou	2008	0	3	2	1	59.2513	922.84	13346.2	1.59259	20.8	85.3676
959	Ya'an	2008	0	3	2	1	66.7343	328.97	12332.7	1.12466	67.89	81.7045
960	Bazhong	2008	0	3	2	3	32.6038	554.56	5190.55	0.545477	24.25	13.2607
961	Ziyang	2008	0	3	2	3	24.7692	659.89	11389.7	2.63003	80	24.4061
962	Guiyang	2008	0	3	2	3	46.1116	901.21	22509.9	0.796667	32.46	96.9075
963	Liupanshui	2008	0	3	2	2	33.7912	1028.21	20707.7	1.59447	46.91	69.1587
964	Zunyi	2008	0	3	2	2	59.5486	639.82	16561.3	0.961665	47.08	115.38
965	Kunming	2008	0	3	1	3	36.092	594.46	26531.6	0.698791	82.23	122.526
966	Qujing	2008	1	3	2	2	25.87	443.66	25257.1	1.97036	32.69	65.7475
967	Yuxi	2008	1	3	2	1	7.85153	415.04	52038.5	3.62761	58.4	45.9803
968	Baoshan	2008	0	3	2	2	36.6157	175.89	6665.47	0.785023	33.15	24.5065
969	Zhaotong	2008	0	3	2	2	19.9812	359.55	7945.75	1.01099	55.18	15.7065
970	Lijiang	2008	0	3	2	1	39.957	122.15	14754.3	0.555556	64.38	65.8187
971	Simao	2008	0	3	2	1	33.0597	54.81	11003	0.878311	90.93	43.3349
972	Xi'an	2008	1	2	1	3	28.1581	1548.66	20118.5	0.816835	59.4	65.7455
973	Tongchuan	2008	0	2	2	2	36.7106	316.13	10272	1.50579	46	34.4465
974	Baoji	2008	1	2	2	3	24.0431	389.34	19697.6	2.10421	80.1	47.1003
975	Xianyang	2008	0	2	2	2	128.909	1689.94	22075.9	1.7138	42.27	282.854
976	Weinan	2008	0	2	2	2	43.7941	762.66	8325.37	1.0737	65.81	33.2707
977	Yan'an	2008	1	2	2	1	17.3348	124.3	20395.5	2.31663	42.46	32.8733
978	Hanzhong	2008	0	2	2	2	37.8266	978.6	9341.2	0.837162	60	35.5817
979	Yulin	2008	1	2	2	1	14.1829	70.65	14601.7	1.43215	45	21.6737
980	Ankang	2008	0	2	2	2	63.8766	271.35	6388.74	0.601321	44	36.4988
981	Lanzhou	2008	0	2	1	3	44.8229	1274.98	22949.9	0.893756	60.96	112.482
982	Jiayuguang	2008	0	1	2	1	79.1076	63.34	50351.4	4.9003	82.99	444.809
983	Jinchang	2008	0	1	2	1	52.228	70.92	54122.6	7.78896	79.97	281.878
984	Baiyin	2008	0	1	2	1	92.9293	142.01	23791.3	2.50361	39.16	221.543
985	Tianshui	2008	0	2	2	3	36.8944	213.67	8121.94	0.987152	66.58	28.7311
986	Wuwei	2008	1	1	2	3	22.427	202.5	10371.3	0.993701	82.85	22.5386
987	Zhangye	2008	1	1	2	2	19.3853	121.77	11098.1	0.894391	76.99	20.8987
988	Jiuquan	2008	0	1	2	1	45.3934	107.56	12522.7	0.5888	90	56.6722
989	Qingyang	2008	0	2	2	1	25.677	346.49	12300.1	1.43707	81	31.585
990	Dingxi	2008	0	1	2	1	25.5607	110.22	3568.08	0.517291	57.63	8.93279
991	Xining	2008	1	2	2	3	62.5759	2952.89	18137.1	0.794315	52.35	113.493
992	Yinchuan	2008	1	2	2	2	40.5067	384.42	24303.8	0.672527	87.61	113.102
993	Shizuishan	2008	1	1	2	1	73.3712	199.69	26839.8	3.30331	74.58	197.054
994	Wuzhong	2008	1	2	2	1	59.8587	294.64	10355.9	1.31994	89.91	61.1884
995	Guyuan	2008	1	2	2	1	25.2061	96.86	5090.93	0.301296	74.03	12.8335
996	Zhongwei	2008	1	2	2	1	10.3913	58.97	10645	1.23203	44.78	11.1197
997	Wulumuqi	2008	1	1	1	3	40.8249	227.97	17294.4	0.740035	48.39	131.184
998	Kelamayi	2008	0	1	1	1	23.3934	40.45	72493.4	10.6026	91.15	289.72
999	Beijing	2009	1	2	1	3	19.4668	963.84	47250.5	0.306426	77.85	129.245
1000	Tianjin	2009	1	2	1	3	17.8605	1085.15	45856	1.18174	80.1	87.3558
1001	Shijiazhuag	2009	1	2	1	3	34.864	5324.12	28459.6	0.418618	83.28	100.309
1002	Tangshan	2009	0	2	1	3	22.2865	2495.93	40454.3	1.68093	92.5	89.9414
1003	Qinhuangdao	2009	0	2	2	2	33.8533	2276.31	26652.1	0.659095	89.2	123.466
1004	Handan	2009	1	2	2	3	55.2101	3396.31	23416.2	1.65399	84.1	116.927
1005	Xingtai	2009	0	2	2	2	59.6157	4554.07	17622.9	1.71793	84.01	116.835
1006	Baoding	2009	0	2	2	3	27.6185	3405.45	29616.9	1.57732	89.02	80.6871
1007	Zhangjiakou	2009	0	2	2	2	46.7422	2384.31	21165.4	1.28768	82.28	104.239
1008	Chengde	2009	0	2	2	2	46.7803	717.24	23321.4	1.5776	82.96	105.265
1009	Cangshou	2009	0	2	2	2	21.3163	2912.02	35567.8	0.891788	76.98	84.5562
1010	Langfang	2009	1	2	2	2	21.5246	2775	22371.8	0.932186	85.78	48.7721
1011	Hengshui	2009	0	2	2	1	25.8325	1139.19	20538.6	1.69873	89.97	75.9164
1012	Taiyuan	2009	1	2	1	3	27.9447	1953.15	36635.6	0.767612	70	95.4797
1013	Datong	2009	0	2	2	3	88.4863	743.7	25179	1.12495	81.69	83.7029
1014	Yangquan	2009	0	2	2	2	36.4588	1054.6	23585.8	1.26121	78	85.5294
1015	Changzhi	2009	0	2	2	2	55.9581	2089.82	20024	0.997175	85	121.175
1016	Jincheng	2009	1	2	2	1	22.1767	2398.6	26848.2	0.597807	95	55.277
1017	Shuozhou	2009	0	2	2	2	18.0719	142.45	82901.7	2.18167	96	75.6124
1018	Jinzhong	2009	0	2	2	2	30.5567	449.12	15089.6	0.583595	77	43.4783
1019	Yuncheng	2009	0	2	2	2	20.791	542.3	11279.9	0.454689	85	22.7045
1020	Xinzhou	2009	0	2	2	2	42.2839	266.7	8496.89	0.586897	45.57	36.398
1021	Linfen	2009	0	2	2	2	24.4751	632.98	15473.9	0.636733	32.28	34.886
1022	Lvliang	2009	0	2	2	1	36.7381	205	11098.4	0.778953	47	45.0638
1023	Huhehaote	2009	1	2	1	3	20.6619	578.33	36964.4	0.382865	73.8	106.086
1024	Baotou	2009	1	1	1	3	26.4491	546.04	49552.7	1.11638	82.01	174.343
1025	Wuhai	2009	0	1	2	1	70.0175	274	33118.6	2.28249	68.86	234.082
1026	Chifeng	2009	0	2	2	3	32.0415	171.6	16146	1.27881	58.39	51.4822
1027	Tongliao	2009	0	2	2	2	116.593	270.47	22051.9	1.97527	72	252.425
1028	E'erduosi	2009	1	1	2	1	8.00488	100.04	60640.6	0.65664	78.32	82.8526
1029	Hulunbei'er	2009	0	2	2	1	31.5806	186.94	25187.3	0.761773	60.64	79.0119
1030	Bayanzhuo'er	2009	0	1	2	2	19.8084	227.7	15180	1.46704	43.9	30.0187
1031	Wulanchabu	2009	0	1	2	1	67.4653	2038.26	15120.6	0.956443	46	102.009
1032	Shenyang	2009	0	2	1	3	25.8771	1475.74	37533.9	0.995323	78	111.151
1033	Dalian	2009	1	2	1	3	22.3235	1250.56	54670.8	0.904846	92.91	133.949
1034	Anshan	2009	1	2	1	3	74.2868	2359.62	43995.5	1.57298	35.99	326.297
1035	Fushun	2009	0	3	2	3	55.3117	1947.48	22280.4	1.72609	57.36	123.481
1036	Benxi	2009	0	3	2	2	103.569	629.38	29418.8	1.74544	43	330.469
1037	Jinzhou	2009	0	2	2	2	68.9601	2141.74	19924.9	1.23164	50.65	159.831
1038	Yingkou	2009	0	2	2	2	25.6466	1271.79	35572	1.60011	59	77.6658
1039	Fuxin	2009	0	2	2	2	80.2413	1583.47	12396.5	1.57407	58.8	99.6649
1040	Liaoyang	2009	1	2	2	2	82.735	1166.93	27477.9	1.54438	75.23	227.208
1041	Panjin	2009	0	2	2	2	28.7811	2278.95	41164.9	2.38056	61.36	122.913
1042	Tieling	2009	0	2	2	1	51.036	678.15	17021.1	1.87444	85.4	86.7756
1043	Chaoyang	2009	0	2	2	2	33.6436	525.95	14184.4	0.884724	36.45	45.8863
1044	Huludao	2009	0	2	2	2	23.7063	432.16	16924.5	1.57693	42.52	39.393
1045	Changchun	2009	1	2	1	3	25.951	756.57	32276.2	1.39409	84.67	83.5919
1046	Jilin	2009	0	3	1	3	51.341	508.99	25745	1.19361	90	131.129
1047	Siping	2009	1	2	2	2	24.2824	937.69	14054.2	1.33735	42.47	39.3437
1048	Liaoyuan	2009	1	2	2	1	26.5762	1081.22	24108.1	1.50253	55.91	64.0301
1049	Songyuan	2009	0	2	2	2	23.364	417.06	25192.6	2.33979	60	84.1477
1050	Ha'erbin	2009	1	3	1	3	26.9919	669.91	30598.8	0.745756	64	82.6269
1051	Qiqiha'er	2009	0	2	2	3	32.0812	325.29	16086.3	0.867096	42.93	49.3133
1052	Daqing	2009	1	2	1	3	32.4023	259.51	93576.1	4.83793	90.13	301.607
1053	Jiamusi	2009	0	3	2	2	57.6363	434.61	16370.9	0.555013	66.53	94.8828
1054	Mudanjiang	2009	0	3	2	2	336.833	324.31	15493.5	0.887751	57.61	542.623
1055	Heihe	2009	0	3	2	1	22.9281	13.3	13129.8	0.555709	19	30.0885
1056	Shanghai	2009	1	3	1	3	34.8712	2583.28	53304	0.665828	78.9	256.36
1057	Nanjing	2009	1	3	1	3	47.3629	1155.98	42232.3	0.833961	58.65	199.159
1058	Wuxi	2009	0	3	1	3	23.9869	1467.16	69167.8	1.15065	86.51	165.669
1059	Xuzhou	2009	1	2	1	3	27.6936	1605.34	37024.7	1.22079	74.92	102.035
1060	Changzhou	2009	0	3	1	3	28.4715	1210.84	50904.7	1.41473	73	144.677
1061	Suzhou	2009	0	3	1	3	27.478	1455.82	75066	1.22013	69.8	205.408
1062	Nantong	2009	1	3	1	3	29.1701	1390.8	32461.1	1.44769	82.9	94.7386
1063	Lianyungang	2009	0	2	2	2	44.6438	767.21	26156	1.09393	61.78	111.625
1064	huai'an	2009	0	2	2	3	27.9176	272.56	14894.1	1.32015	58	41.8403
1065	Yancheng	2009	0	2	2	3	19.9196	872.99	19553.2	1.53279	60.61	38.868
1066	Yangzhou	2009	0	3	1	3	21.9797	1191.31	40907.9	1.47829	66.47	89.8352
1067	Zhenjiang	2009	0	3	2	3	36.9406	956.1	43132.4	1.56884	66.91	158.84
1068	Taizhou	2009	1	2	2	2	17.8189	1282.34	33819.7	1.88511	56.09	59.7417
1069	Suqian	2009	0	2	2	3	15.9418	756.74	11663.9	1.4101	73.82	18.5055
1070	Hangzhou	2009	0	3	1	3	26.7486	1399.74	46790.8	0.834802	88.87	161.836
1071	Wenzhou	2009	0	3	1	3	37.1147	1219.63	46806.1	1.0507	59.18	172.563
1072	Jiaxing	2009	0	3	2	2	20.2779	858.68	28100.8	1.1729	82.51	75.1083
1073	Huzhou	2009	0	3	2	3	26.3381	692.79	25507.6	1.43352	83.08	78.3898
1074	Shaoxing	2009	0	3	2	2	40.6336	1792.82	40092.6	0.937033	75.93	162.912
1075	Jinhua	2009	0	3	2	2	24.1182	453.52	22480.9	0.95575	61.71	56.5588
1076	Quzhou	2009	0	3	2	2	51.4113	349.11	20612.2	1.15422	66.32	105.743
1077	Zhoushan	2009	0	3	2	2	16.7014	677.88	34797	0.847965	70.54	58.0821
1078	Taizhou	2009	0	3	1	3	26.7536	1001.11	30381.2	1.03783	72.05	81.0106
1079	Lishui	2009	0	3	2	1	39.9485	256.06	21991.8	0.80699	61.02	95.4498
1080	Hefei	2009	1	2	1	3	28.4666	2486.05	34158.8	1.07124	83	132.865
1081	Wuhu	2009	0	3	2	3	35.9308	1373.3	38011.4	1.75007	67.98	136.657
1082	Bengbu	2009	0	2	2	2	116.287	1539.43	17660.8	1.49462	79.9	205.35
1083	Huainan	2009	0	3	2	3	50.0201	1069.01	13328.1	1.85239	37.54	61.3653
1084	Ma'anshan	2009	0	3	2	2	75.7516	1870.88	49887.8	2.1889	69.8	379.311
1085	Huaibei	2009	1	2	2	3	26.737	1434.47	15878.9	2.32201	74.09	42.2858
1086	Anqing	2009	0	3	2	2	56.8668	900.85	15868.5	0.735894	60.51	90.4678
1087	Huangshan	2009	0	3	2	1	36.1725	199.23	17241.2	0.785325	67.89	58.2297
1088	Chuzhou	2009	0	3	2	2	34.6951	379.2	15748	1.65286	62.23	54.4328
1089	Fuyang	2009	0	2	2	3	50.8751	1107.54	5702.41	0.840235	64.65	28.7862
1090	Suzhou	2009	0	2	2	3	45.8071	641.21	7224.36	1.08947	47.71	32.795
1091	Lu'an	2009	0	2	2	3	58.9193	516.75	5238.73	0.756312	80.8	24.6557
1092	Bozhou	2009	0	2	2	3	23.6175	716.62	6222.37	1.10218	87.65	14.5123
1093	Chizhou	2009	0	3	2	2	30.0432	270.6	11806.7	1.08885	33.55	35.3746
1094	Yicheng	2009	0	3	2	2	27.8075	327.2	8294.86	0.63669	27.27	26.0261
1095	Fuzhou	2009	0	3	1	3	30.7521	1796.07	29199.1	0.563633	72.76	129.899
1096	Xiamen	2009	0	3	1	3	28.4537	1125.24	41077.7	0.916602	90.26	166.407
1097	Putian	2009	1	3	2	3	17.18	932.49	17390.9	1.69134	76	27.4955
1098	Sanming	2009	0	3	2	1	67.0627	240.75	28014.6	1.26508	17.96	263.329
1099	Quanzhou	2009	1	3	2	3	31.9035	1211.06	32261.3	1.23511	79.42	129.93
1100	Zhangzhou	2009	0	3	2	2	23.4423	1371.82	29725.9	0.934674	45.14	76.1316
1101	Nanping	2009	0	3	2	1	72.1874	185.23	18130.4	1.50519	27.37	133.347
1102	Longyan	2009	0	3	2	1	22.7233	178.53	34867.6	1.8041	71.96	96.9462
1103	Ningde	2009	0	3	2	1	26.4064	281.46	15253.5	0.506071	35.75	39.4129
1104	Nanchang	2009	0	3	1	3	45.5933	3606.16	36435.4	1.21343	86.07	158.049
1105	Jingdezhen	2009	1	3	2	1	50.5591	1082.51	24354.8	1.45534	82.43	133.959
1106	Pingxiang	2009	1	3	2	2	30.224	786.76	25724.8	1.94609	75.6	57.4556
1107	Jiujiang	2009	0	3	2	2	32.4359	1066.89	38631.5	0.980317	49.02	122.79
1108	Xinyu	2009	0	3	2	2	16.9033	515.6	29742	1.56529	83.07	45.8044
1109	Yingtan	2009	0	3	2	1	40.7771	1622.63	20275.2	0.814801	85	74.4939
1110	Ganzhou	2009	0	3	2	2	42.8119	1348.02	18667.6	1.09063	16.43	75.2672
1111	Ji'an	2009	0	3	2	2	52.5229	400.75	10194.5	1.00941	80.01	54.9012
1112	Yichun	2009	0	3	2	3	51.6995	411.61	5901.99	0.74624	96.31	30.3685
1113	Fuzhou	2009	0	3	2	3	52.4968	523.61	9878.31	1.78074	38.97	50.0675
1114	Shangrao	2009	0	3	2	1	53.7435	1164.6	16516.6	0.995366	82.06	80.4711
1115	Ji'nan	2009	0	2	1	3	18.2319	1062.68	36656.8	0.678369	78.21	79.7065
1116	Qingdao	2009	0	2	1	3	19.8194	1960.64	61251	0.991376	85.14	121.574
1117	Zibo	2009	1	2	1	3	23.0595	938.62	42765.6	1.76329	88.87	94.6192
1118	Zaozhuang	2009	0	2	2	3	20.1499	715.51	19054.9	2.74439	87.42	36.3496
1119	Dongying	2009	0	2	1	2	11.1187	252.82	82479.9	3.43969	83.54	111.395
1120	Yantai	2009	0	2	1	3	13.066	658.49	52491.2	1.68896	89.1	68.5952
1121	Weifang	2009	0	2	2	3	21.3777	683.96	21207.1	1.42003	89.22	49.3076
1122	Ji'ning	2009	0	2	2	3	30.8809	1146.79	29220.4	1.71509	93.34	84.3157
1123	Weihai	2009	0	2	2	2	18.3691	830.63	47977.8	1.79971	88.74	86.7989
1124	Rizhao	2009	0	2	2	3	14.7997	641.41	33183.1	1.69919	79.34	48.9457
1125	Laiwu	2009	0	2	2	3	14.5254	562.69	22362.6	1.96827	91.38	32.8216
1126	Linyi	2009	0	2	1	3	23.7064	1132.65	22365	1.61454	91.3	55.3745
1127	Dezhou	2009	1	2	2	2	32.2072	1126.82	26399.2	1.47645	73.63	94.4199
1128	Liaocheng	2009	0	2	2	3	34.0193	837.48	13713.7	1.33272	81.93	41.2779
1129	Binzhou	2009	1	2	2	2	28.5614	607.4	25884.2	1.23267	82.21	78.3014
1130	Heze	2009	0	2	2	3	55.7882	1057.24	8645.84	1.00364	79.46	46.4572
1131	Zhengzhou	2009	1	2	1	3	40.3822	2821.88	26371.1	0.499018	97.2	124.469
1132	Kaifeng	2009	0	2	2	2	62.0416	2358.56	12537.3	0.851335	88.05	84.4811
1133	Luoyang	2009	1	2	2	3	33.1318	2942.46	23679.5	1.05291	94.34	84.6255
1134	Pingdingshan	2009	0	2	2	3	40.747	2219.17	27317.2	3.06054	93.62	100.108
1135	Anyang	2009	1	2	2	3	57.4629	1976.65	15714.3	1.49072	82.42	102.251
1136	Hebi	2009	0	2	2	2	43.5859	897.94	19288.9	2.9795	77.6	79.3833
1137	Xinxiang	2009	0	2	2	3	65.4824	2930.64	16301.5	1.02477	86.71	106.746
1138	Jiaozuo	2009	0	2	2	2	58.8232	1969.81	15169.5	1.21863	77.09	95.7375
1139	Puyang	2009	0	2	2	2	37.2037	2582.31	24267.9	3.26682	53.42	75.0223
1140	Xuchang	2009	0	2	2	1	40.0446	4244.33	20637.5	2.6019	89.31	100.607
1141	Luohe	2009	0	2	2	3	47.2409	1364.41	16510.7	3.10364	47.32	71.6534
1142	Sanmengxia	2009	0	2	2	1	29.9127	1474.75	18977.2	1.3441	100	62.5
1143	Nanyang	2009	0	2	2	3	24.0974	935.49	13387.7	1.06628	46.84	30.5849
1144	Shangqiu	2009	0	2	2	3	36.811	1082.5	8254.74	1.35712	95.63	26.6051
1145	Xinyang	2009	0	2	2	3	25.3333	404.41	11462.4	1.32838	80.41	25.4751
1146	Zhoukou	2009	0	2	2	2	32.6489	3562.84	12015.2	0.849464	69.88	35.6723
1147	Zhumadian	2009	0	2	2	2	38.5125	856.74	14279.8	1.37148	89.37	56.4409
1148	Wuhan	2009	1	3	1	3	41.8738	1894.67	37618.5	0.871254	89.8	189.549
1149	Huangshi	2009	0	3	2	2	71.0093	3018.57	22380.4	1.58296	72.22	180.78
1150	Shiyan	2009	0	3	2	2	56.2595	442.41	38133.4	1.12465	53.46	208.962
1151	Yichang	2009	1	3	2	3	26.2354	293.76	29128.1	1.94326	87.17	81.9056
1152	Xiangfan	2009	1	3	2	3	72.4941	603.89	19352	1.1623	81	139.59
1153	Ezhou	2009	0	3	2	3	31.0292	713.03	18768.2	1.78293	70	56.1451
1154	Jingmen	2009	1	3	2	2	58.5697	312.85	22292.8	1.63211	43.42	109.069
1155	Xiaogang	2009	0	3	2	2	34.931	1023.47	9785.11	1.12795	19.79	30.2933
1156	Jingzhou	2009	0	3	2	3	73.8529	741.43	12147.5	1.35976	41.15	94.3603
1157	Huanggang	2009	0	3	2	1	81.009	1042.49	14035.1	1.28354	72.4	105.788
1158	Xianning	2009	0	3	2	2	56.6667	398.53	10771.2	1.03057	35.57	62.0943
1159	Suizhou	2009	0	3	2	2	43.1924	489.26	13461.4	1.11203	84	57.9623
1160	Changsha	2009	1	3	1	3	33.0566	2523.04	50389	0.701136	81.4	187.358
1161	Zhuzhou	2009	1	3	2	3	51.2473	1866.11	32617.7	1.66233	50.83	161.72
1162	Xiangtan	2009	1	3	2	2	47.5039	3145.16	31367.5	1.56799	49.03	141.333
1163	Hengyang	2009	0	3	2	3	82.7422	1508.97	19638.1	1.25136	22	153.141
1164	Shaoyang	2009	0	3	2	2	120.755	1543.58	10714	1.08394	44.1	134.458
1165	Yueyang	2009	1	3	2	2	50.3699	702.33	29059.4	1.52154	68	192.298
1166	Changde	2009	0	3	2	3	18.7574	560	25816	1.40753	49.68	45.3472
1167	Zhangjiajie	2009	0	3	2	1	31.4416	182.38	13692.7	0.242138	52.7	39.7554
1168	Yiyang	2009	0	3	2	3	26.8613	685.94	11804	1.23047	68.58	28.4111
1169	Chenzhou	2009	0	3	2	2	51.8724	296.62	20734.8	1.18347	27.26	120.91
1170	Yongzhou	2009	0	3	2	3	84.6497	344.51	11229.3	1.04448	39.3	87.3711
1171	Huaihua	2009	0	3	2	1	59.6257	522.22	17903	0.515381	35	132.346
1172	Loudi	2009	0	3	2	1	40.8556	1053.29	20974	1.59483	48.45	92.0883
1173	Shaoguan	2009	0	3	2	2	28.9389	320.87	20465.4	0.874901	60.47	58.041
1174	Shenzhen	2009	1	3	1	3	29.0551	1234.74	58435.3	0.876244	80.17	610.237
1175	Zhuhai	2009	0	3	1	3	46.647	603.47	44022.3	1.16767	69.25	297.302
1176	Shantou	2009	0	3	1	3	44.22	2573.77	12921.4	1.39252	53.19	56.8679
1177	Foshan	2009	0	3	1	3	14.1778	955.38	50822.5	1.80029	68.83	117.107
1178	Jiangmen	2009	0	3	1	3	47.457	770.34	30761.5	1.84645	66.76	166.955
1179	Zhanjiang	2009	0	3	2	3	23.2921	1039.79	26619.4	1.1203	38.27	60.2991
1180	Maoming	2009	0	3	2	3	21.5059	1495.19	22610.8	1.22167	35.76	46.1433
1181	Zhaoqing	2009	0	3	2	2	50.4264	698.95	29889.7	1.07056	40.44	194.228
1182	Huizhou	2009	0	3	1	3	34.5719	482.86	30924.6	1.52895	63.2	149.922
1183	Shanwei	2009	0	3	2	2	41.136	1263.86	14929.4	1.57937	55.6	57.9409
1184	Heyuan	2009	0	3	2	1	58.5854	824.03	24451.3	1.2153	62.87	158.666
1185	Yangjiang	2009	0	3	2	2	38.675	883.93	19509.3	0.769527	45.95	74.2404
1186	Qingyuan	2009	0	3	2	2	45.3454	496.68	27413.6	2.26664	37.36	139.211
1187	Dongguang	2009	1	3	1	3	67.8172	725.07	35651.9	0.946648	67.07	899.58
1188	Zhongshan	2009	0	3	1	3	7.49302	821.44	39244.1	1.4666	90.9	50
1189	Chaozhou	2009	0	3	2	1	65.9953	2256.13	17204.6	0.991341	30.36	128.11
1190	Nanning	2009	0	3	1	3	54.1209	414.36	24757.3	0.554849	80.32	133.174
1191	Guilin	2009	0	3	2	2	51.6787	1341.42	22671.4	0.730858	63.71	123.222
1192	Wuzhou	2009	0	3	2	2	51.3663	455.92	18781.9	1.12078	25.95	96.1446
1193	Beihai	2009	1	3	2	2	37.1852	631.35	22551.8	0.930929	44.6	75.6041
1194	Fangchenggang	2009	0	3	2	2	23.0371	184.03	22024.4	1.63299	6.68	48.7081
1195	Guigang	2009	0	3	2	3	82.4699	524.53	7621.23	1.14893	0.16	54.9397
1196	Yulin	2009	1	3	2	2	35.7141	781.85	11982.2	0.904722	25.66	47.2856
1197	Hezhou	2009	0	3	2	3	33.1525	192.47	8093.88	1.58424	60	26.0707
1198	Hechi	2009	0	3	2	1	93.6295	141.54	10348.8	1.60775	87.75	120.984
1199	Laibin	2009	0	3	2	3	22.9798	241.22	9490.97	1.43803	35	20.4237
1200	Chongzuo	2009	0	3	2	1	33.2867	121.31	9834.44	0.953987	1.55	32.8492
1201	Haikou	2009	0	3	2	3	45.971	686.51	16645.4	0.356862	83.56	89.7877
1202	Sanya	2009	1	3	2	2	68.0586	290.91	22569.7	0.359625	77.6	133.674
1203	Chongqing	2009	1	3	1	3	26.8647	592.44	18774.2	1.00212	78.76	50.0049
1204	Chengdu	2009	0	3	1	3	31.5659	2398.07	28444.6	0.795671	78.78	117.298
1205	Zigong	2009	1	2	2	3	21.2961	1047.15	14880.6	1.85014	74.94	30.6946
1206	Panzhihua	2009	0	3	2	2	55.7742	342.91	27554.5	3.04208	25.22	163.699
1207	Luzhou	2009	0	3	2	3	45.2337	682.28	13380.2	1.8133	13.25	57.8163
1208	Deyang	2009	1	3	2	2	35.2708	1016.98	19931.1	1.9552	44.65	72.4431
1209	Mianyang	2009	1	3	2	3	32.2176	779.04	17824.7	1.52406	49.72	62.9139
1210	Guangyuan	2009	0	3	2	2	33.8106	203.23	8428.46	0.951021	74.34	27.263
1211	Suining	2009	0	3	2	3	26.5624	804.48	9770.43	1.17065	73.32	17.6876
1212	Neijiang	2009	0	3	2	3	28.754	903.31	9334.61	2.03978	41.87	25.8731
1213	Leshan	2009	0	3	2	3	23.484	457.48	15515.6	2.26679	47.54	37.3967
1214	Nanchong	2009	0	3	2	3	44.8515	765.14	7820.04	1.50471	44.57	35.2728
1215	Meishan	2009	0	3	2	2	31.4112	642.37	12160.9	1.75913	32.09	34.5497
1216	Yibin	2009	0	3	2	2	27.8828	707.6	21371.7	2.58779	20.72	60.9896
1217	Guang'an	2009	0	3	2	3	28.6622	820.96	7707.24	1.27979	41.03	18.3902
1218	Dazhou	2009	0	3	2	1	58.6059	971.65	13944.9	1.65035	18.63	83.6462
1219	Ya'an	2009	0	3	2	1	53.1157	328.88	12085.7	1.09772	68	63.9386
1220	Bazhong	2009	0	3	2	3	23.8483	558.26	4968.43	0.583699	25.27	9.24956
1221	Ziyang	2009	0	3	2	3	24.8405	665.34	11434.2	2.63502	67.55	24.3902
1222	Guiyang	2009	0	3	1	3	45.6126	910.11	18430.7	0.705687	44.27	97.1571
1223	Liupanshui	2009	0	3	2	2	22.0528	1085.04	19679.3	1.25621	33.26	40.9443
1224	Zunyi	2009	0	3	2	2	31.7173	648.18	31276.3	0.710064	52.54	57.1043
1225	Kunming	2009	0	3	1	3	38.1649	609.6	23359.5	0.779783	79.94	131.294
1226	Qujing	2009	1	3	2	2	22.286	447.33	24833.5	1.88299	70.78	55.6067
1227	Yuxi	2009	1	3	2	1	9.62067	418.92	50071.8	3.6108	74.01	55.7537
1228	Baoshan	2009	0	3	2	2	36.8632	177.71	6606.1	0.764868	29.79	24.256
1229	Zhaotong	2009	0	3	2	2	19.894	364.69	8101.86	1.20913	47.19	15.8649
1230	Lijiang	2009	0	3	2	1	57.824	122.15	15624.1	0.536762	75	101.305
1231	Simao	2009	0	3	2	1	41.0731	53.16	11369.8	0.810811	29.5	55.2849
1232	Xi'an	2009	1	2	1	3	28.0896	1567.78	21085.9	0.74964	62.73	68.2129
1233	Tongchuan	2009	0	2	2	2	18.4376	314.71	11456.3	1.92391	57.55	20.8531
1234	Baoji	2009	1	2	2	3	24.1153	395.55	19779.3	2.25974	85.36	47.0114
1235	Xianyang	2009	0	2	2	2	135.514	1702.09	20535.1	1.78775	49.87	286.577
1236	Weinan	2009	0	2	2	2	35.0091	792.79	9093.54	1.09446	56.32	30.2169
1237	Yan'an	2009	1	2	2	1	20.3418	126.18	17869.6	1.02207	84.97	33.4299
1238	Hanzhong	2009	0	2	2	2	38.2018	993.88	9874.06	0.663738	39.44	37.2964
1239	Yulin	2009	1	2	2	2	12.4831	72.21	12853.6	1.15542	32	26.4677
1240	Ankang	2009	0	2	2	2	124.967	274.12	6521.64	0.623586	45	72.2595
1241	Lanzhou	2009	0	2	1	3	51.8819	1289.64	23636.6	0.88369	74.18	130.479
1242	Jiayuguang	2009	0	1	2	1	78.8569	71.11	50037.2	4.00406	83.99	397.7
1243	Jinchang	2009	0	1	2	1	76.5029	71.32	49101.4	7.41809	65.52	374.594
1244	Baiyin	2009	0	1	2	1	92.8036	142.78	24171.9	2.20476	36.13	216.15
1245	Tianshui	2009	0	2	2	3	35.6973	215.08	8387.43	1.0761	46.78	28.5578
1246	Wuwei	2009	1	1	2	3	25.3436	203.84	8407.82	1.10863	83.12	20.5948
1247	Zhangye	2009	1	1	2	2	18.1601	122.33	11035.1	0.856258	80.87	19.4718
1248	Pingliang	2009	0	2	2	1	18.3596	258.21	8703.75	0.957703	71.65	16.0032
1249	Jiuquan	2009	0	1	2	1	40.1897	118.49	15268.9	0.868739	31.63	61.3659
1250	Qingyang	2009	0	2	2	1	22.4797	357.13	13962.2	1.2693	85	30.8125
1251	Dingxi	2009	0	1	2	1	28.2371	110.6	3783.35	0.462794	53.04	10.764
1252	Longnan	2009	0	2	2	2	8.02058	117.79	4035.23	0.28344	27.1	3.86149
1253	Xining	2009	1	2	2	3	49.7612	3003.42	20025.1	0.695919	54.47	98.8084
1254	Yinchuan	2009	1	2	2	2	37.0732	395.59	22985.9	0.677852	90.93	111.846
1255	Shizuishan	2009	1	1	2	1	26.8214	200.26	27947.5	2.31529	86.91	75.1211
1256	Wuzhong	2009	1	2	2	1	58.9718	300.55	10388.4	1.42703	62.81	60.6665
1257	Guyuan	2009	1	2	2	1	22.9891	159.64	5061.86	0.333169	90	11.6432
1258	Zhongwei	2009	1	2	2	1	9.68972	73.24	10917	0.851393	83.53	10.8818
1259	Wulumuqi	2009	1	1	1	3	41.2156	243.39	26247.5	0.724468	49.92	128.39
1260	Kelamayi	2009	0	1	2	1	36.0055	41.21	58217.7	6.84136	91.81	294.079
1261	Beijing	2010	1	2	1	3	18.9477	974.08	46092.9	0.314793	80.98	131.068
1262	Tianjin	2010	1	2	1	3	16.9313	1090.71	37852.5	1.12839	83	85.4626
1263	Shijiazhuag	2010	1	2	1	3	38.736	11449.3	29312.8	0.415266	95.3	113.294
1264	Tangshan	2010	0	2	1	3	22.2258	2496.19	42365.6	1.74878	94.11	94.0786
1265	Qinhuangdao	2010	0	2	2	2	33.7416	2379.61	30861.6	0.705343	92.1	119.333
1266	Handan	2010	1	2	2	3	53.0794	3413.59	22149.6	1.42773	91.74	112.231
1267	Xingtai	2010	0	2	2	2	56.6976	6218.26	16874.5	1.8618	84.51	99.0071
1268	Baoding	2010	0	2	2	3	31.987	3400.64	28116.2	1.54197	89.88	94.2507
1269	Zhangjiakou	2010	0	2	2	2	39.5541	2390.96	20479.5	1.32517	87.5	91.5017
1270	Chengde	2010	0	2	2	2	45.9313	767.5	20203.3	1.45933	86.63	93.4853
1271	Cangshou	2010	0	2	2	2	14.209	2945.9	39750.2	1.06113	85.07	65.09
1272	Langfang	2010	1	2	2	2	23.0586	2752.74	22158.2	0.809135	86.11	55.1754
1273	Hengshui	2010	0	2	2	1	36.3048	1797.07	21536.9	1.9155	86.51	73.4407
1274	Taiyuan	2010	1	2	1	3	30.406	1952.12	36011	0.786113	66.1	104.081
1275	Datong	2010	0	2	2	3	23.7692	749.57	21441.1	1.09797	79.85	51.6965
1276	Yangquan	2010	1	2	2	2	37.2943	1060.12	25544.9	1.34853	82.99	91.3773
1277	Changzhi	2010	0	2	2	2	56.8359	2176.95	18676.6	0.950306	92	111.456
1278	Jincheng	2010	1	2	2	1	18.3223	2437.76	22538.6	0.718322	95.62	47.1601
1279	Shuozhou	2010	0	2	2	2	10.4906	144.85	87812.8	1.81469	98	38.4533
1280	Jinzhong	2010	0	2	2	2	29.9583	451.59	15582.6	0.665693	90	43.75
1281	Yuncheng	2010	0	2	2	2	24.6294	542.47	10638.8	0.453356	90	26.5362
1282	Xinzhou	2010	0	2	2	2	42.7888	266.85	8847.31	0.739894	74.49	38.9866
1283	Linfen	2010	0	2	2	2	18.7483	635.11	13398.5	0.677848	46.1	25.7478
1284	Lvliang	2010	0	2	2	1	31.4267	207.47	15262.1	1.06011	41	44.5284
1285	Huhehaote	2010	1	2	1	3	22.1058	586.95	32628.8	0.249301	95.99	98.366
1286	Baotou	2010	1	1	1	3	28.1927	549.98	47449	1.14224	83.88	184.877
1287	Wuhai	2010	0	1	2	2	60.6966	302.17	34413.3	2.62422	89.75	201.094
1288	Chifeng	2010	0	2	2	3	47.3954	171.56	17036.3	1.47842	81.78	80.1252
1289	Tongliao	2010	0	2	2	2	116.796	271.89	22377	2.27629	84.7	260.756
1290	E'erduosi	2010	1	1	2	1	8.308	102.85	111806	0.648264	84.44	91.6218
1291	Hulunbei'er	2010	0	2	2	1	31.4882	188.54	26975.6	0.923522	62.2	84.5672
1292	Bayanzhuo'er	2010	0	1	2	2	20.0821	239.72	15008.4	1.54501	72	28.5841
1293	Wulanchabu	2010	0	1	2	1	65.6661	2043.62	15513	1.12186	48.9	101.741
1294	Shenyang	2010	0	2	1	3	23.861	1484.93	36336.9	1.00982	78	101.783
1295	Anshan	2010	1	2	1	3	47.1686	2353.37	43320	1.51225	70.59	211.978
1296	Fushun	2010	0	3	2	3	46.2184	1937.68	20829.7	1.77274	76.38	116.386
1297	Benxi	2010	1	3	2	2	68.9996	626.68	34207	2.00766	84.53	239.441
1298	Dandong	2010	0	3	2	2	28.2588	837.73	16931.5	1.2467	9.12	49.1437
1299	Jinzhou	2010	0	2	2	2	65.2364	2141.06	25866.9	1.12671	45.47	161.243
1300	Yingkou	2010	0	2	2	2	34.0948	1287.89	32954.6	1.57002	80	111.658
1301	Fuxin	2010	0	2	2	2	74.5899	1609.8	13450.9	1.60432	80	98.9478
1302	Liaoyang	2010	1	2	2	2	79.6939	1205.78	27788.1	1.36015	78.45	210.942
1303	Panjin	2010	0	2	2	2	22.9414	2293.98	49337.5	2.71642	62.97	118.715
1304	Tieling	2010	0	2	2	1	37.778	676.63	16491.2	2.19089	74.08	89.8408
1305	Chaoyang	2010	0	2	2	2	33.3052	506.51	15890.7	1.01995	49.6	52.9259
1306	Huludao	2010	0	2	2	2	30.2335	434.38	16187.5	1.76574	42.53	56.2281
1307	Changchun	2010	1	2	1	3	26.5235	757.47	32547.1	1.43533	89.46	86.3267
1308	Jilin	2010	0	3	1	3	49.7687	504.59	27881.3	1.16697	91.5	138.758
1309	Siping	2010	1	2	2	2	24.5821	568.28	14061.5	1.3776	72.59	41.3325
1310	Liaoyuan	2010	1	2	2	1	19.2865	1083.03	25226.2	1.40727	83.33	48.6526
1311	Tonghua	2010	0	3	2	1	41.1114	600.81	22643.5	2.2785	51.3	93.2752
1312	Baishan	2010	0	3	2	2	21.5402	222.56	18111	1.78941	22.12	39.4184
1313	Songyuan	2010	0	2	2	2	22.7543	443.7	26467.8	2.95583	81.52	81.6465
1314	Baicheng	2010	0	2	2	2	61.3627	202.06	11151.2	0.727937	10.7	68.3457
1315	Ha'erbin	2010	1	3	1	3	25.6989	665.81	30959.4	0.77968	60.5	79.8067
1316	Qiqiha'er	2010	0	2	2	3	29.7929	324.19	18496.5	1.05448	67.46	52.7313
1317	Jixi	2010	0	3	2	2	84.9175	382.17	10543.7	1.98402	50	89.6473
1318	Hegang	2010	0	3	2	2	51.7608	148.54	13598.3	2.33004	52.23	70.5325
1319	Daqing	2010	1	2	1	3	20.0416	261.21	113295	6.09921	91.85	224.475
1320	Yichun	2010	0	3	2	2	53.1998	41.32	8881.12	1.47855	79	50.7236
1321	Jiamusi	2010	0	3	2	2	53.6974	437.33	17781	0.650017	66.53	95.1829
1322	Qitaihe	2010	0	3	2	2	22.5327	156.87	24675.4	2.64245	17.26	54.6758
1323	Mudanjiang	2010	0	3	2	2	326.214	332.52	14271.9	0.993536	66.88	490.062
1324	Heihe	2010	0	3	2	1	28.8268	13.3	11604.3	0.56007	85	34.305
1325	Shanghai	2010	1	3	1	3	30.5147	2605.96	46308.5	0.727889	81	230.018
1326	Nanjing	2010	1	3	1	3	46.721	1158.61	34615.5	0.849745	59.16	204.836
1327	Wuxi	2010	0	3	1	3	28.8681	1452.28	46101.8	1.14577	84.1	192.393
1328	Xuzhou	2010	1	2	1	3	21.0627	1029.36	30746	1.27277	70.82	63.8175
1329	Changzhou	2010	0	3	1	3	24.3496	1223.15	38237.3	1.38181	74.5	131.859
1330	Suzhou	2010	0	3	1	3	27.5174	750.71	50195.3	1.22314	71.24	215.886
1331	Nantong	2010	1	3	1	3	28.5712	1390.8	32037.8	1.25776	83	100.165
1332	Lianyungang	2010	0	2	2	2	42.2466	809.6	22724.5	1.18343	60.09	105.129
1333	huai'an	2010	0	2	1	3	36.013	877.8	17516.5	1.16318	59	60.1186
1334	Yancheng	2010	0	2	2	3	19.8773	876.91	20651.1	1.55236	48.9	40.5622
1335	Yangzhou	2010	0	3	1	3	23.7905	1199.61	38169.1	1.39012	68.94	102.335
1336	Zhenjiang	2010	0	3	2	3	37.0335	956.84	37866.7	1.43169	65.99	160.92
1337	Taizhou	2010	1	2	2	2	17.6396	1292.5	35713.4	1.67636	52.1	64.3254
1338	Suqian	2010	0	2	2	3	25.2882	757.92	13924.5	1.40022	71.46	31.5704
1339	Hangzhou	2010	0	3	1	3	19.8045	1417.28	44541.3	0.857657	93.22	123.189
1340	Ningbo	2010	0	3	1	3	24.8281	907.28	51608.3	1.2539	70.44	194.202
1341	Wenzhou	2010	0	3	1	3	37.8571	1228.05	46980.8	0.994769	65.8	177.245
1342	Jiaxing	2010	0	3	2	2	28.3822	865.19	28597.1	1.18931	84.84	111.785
1343	Huzhou	2010	0	3	2	3	25.8112	694.96	26543.8	1.42298	84.77	80.652
1344	Shaoxing	2010	0	3	2	2	39.9611	1821.85	40983.6	0.897263	79.9	163.592
1345	Jinhua	2010	0	3	2	2	24.446	455.92	22396.7	0.931148	70.23	60.3176
1346	Quzhou	2010	0	3	2	2	55.3409	351.3	22713.9	1.27637	74.86	124.531
1347	Zhoushan	2010	1	3	2	2	17.3699	678.21	37372.2	0.887734	57.31	64.8881
1348	Lishui	2010	0	3	2	1	38.7551	257.52	22430.4	0.832939	66.92	100.155
1349	Hefei	2010	1	2	1	3	28.7318	2569.49	47756.5	1.09497	85.11	136.622
1350	Wuhu	2010	0	3	2	3	36.4365	1348.61	38036.3	1.98158	70.84	138.591
1351	Bengbu	2010	0	2	2	2	88.6618	1537.38	18183.3	1.35148	86.2	161.189
1352	Huainan	2010	0	3	2	3	47.2247	1073.39	13018.4	1.97748	85	59.9361
1353	Ma'anshan	2010	0	3	2	2	66.742	1878.53	51950.4	2.44068	85.76	346.72
1354	Huaibei	2010	1	2	2	3	29.6401	1444.61	17015.9	2.66972	85	50.2596
1355	Anqing	2010	0	3	2	2	47.6976	897.08	20499.4	1.23253	89.4	97.9905
1356	Huangshan	2010	0	3	2	1	39.4942	186.72	17199	0.916476	93.86	67.871
1357	Chuzhou	2010	0	3	2	2	33.0547	382.41	17315.4	1.84692	82.35	57.236
1358	Fuyang	2010	0	2	2	3	46.3346	1122.34	6305.58	0.827133	66.51	29.0249
1359	Suzhou	2010	0	2	2	3	48.5653	648.05	6119.82	1	83	34.3807
1360	Lu'an	2010	0	2	2	3	40.6284	520.57	5144.07	0.674186	94	19.1829
1361	Bozhou	2010	0	2	2	3	25.8866	726.19	6436.89	1.12029	87.33	15.0077
1362	Chizhou	2010	0	3	2	2	28.9584	272.2	12880.7	1.22768	59.59	37.1903
1363	Yicheng	2010	0	3	2	2	29.6775	328.65	9161.85	0.88023	76	27.1303
1364	Fuzhou	2010	0	3	1	3	30.8481	1808.15	28676.8	0.58816	83.41	132.085
1365	Xiamen	2010	0	3	1	3	29.3824	1145.65	30518.8	1.0118	90.96	175.717
1366	Putian	2010	1	3	2	3	16.6797	943.3	18960.9	1.84222	82	28.777
1367	Sanming	2010	0	3	2	1	58.1705	240.24	30653.3	1.38658	73	244.594
1368	Quanzhou	2010	1	3	2	3	35.1899	1213.06	33248.1	1.32797	76.24	147.454
1369	Zhangzhou	2010	0	3	2	2	23.2255	1384.04	27906.8	0.93152	80.03	76.4144
1370	Nanping	2010	0	3	2	1	29.296	186.95	19015.3	1.69448	68.63	54.3736
1371	Longyan	2010	0	3	2	2	20.6672	220.43	32272.9	2.0654	82.02	75.0466
1372	Ningde	2010	0	3	2	1	28.1707	289.26	15532.8	0.578266	69.37	42.0378
1373	Nanchang	2010	1	3	1	3	50.346	3435.98	32967.7	1.03649	92	193.481
1374	Jingdezhen	2010	1	3	2	1	42.8379	796.72	30860.1	1.75042	99.92	132.742
1375	Pingxiang	2010	1	3	2	2	27.6055	791.67	25634.6	2.0465	83.64	56.1404
1376	Jiujiang	2010	0	3	2	2	33.9596	1074.08	35190	1.02565	95.64	135.124
1377	Xinyu	2010	0	3	2	2	16.016	494.75	34336.7	2.01905	95.69	52.0732
1378	Yingtan	2010	0	3	2	1	35.9752	1737.5	23594.8	1.02766	86	75.7935
1379	Ganzhou	2010	0	3	2	2	43.0639	1107.19	16642.1	1.10951	38.01	75.58
1380	Ji'an	2010	0	3	2	2	51.6449	406.87	10578.5	0.998646	80.01	55.7043
1381	Yichun	2010	0	3	2	3	53.8555	414.89	6029.91	0.870594	83.79	32.3465
1382	Fuzhou	2010	0	3	2	3	33.9582	539.87	10219.2	1.90832	75	32.7427
1383	Shangrao	2010	0	3	2	1	50.9424	1176.11	15037.1	0.800151	90.2	80.0602
1384	Ji'nan	2010	0	2	1	3	16.93	1068.53	37553.4	0.605627	89.6	77.6881
1385	Qingdao	2010	0	2	1	3	20.0274	1960.85	63270.1	0.962641	85.29	126.711
1386	Zibo	2010	1	2	1	3	22.3398	941.41	42801.1	1.67141	92.26	95.6402
1387	Zaozhuang	2010	0	2	2	3	21.2138	726.26	18634	2.4848	92.04	37.3906
1388	Dongying	2010	0	2	1	2	11.7147	253.04	80745.6	3.20426	88.16	116.509
1389	Yantai	2010	0	2	1	3	14.9077	657.24	56050.9	1.59448	90.6	83.6389
1390	Weifang	2010	0	2	2	3	21.1892	687.21	23679.9	1.35889	71.73	50.0577
1391	Ji'ning	2010	0	2	2	3	32.115	1075.46	29017.1	1.63857	94.35	96.5499
1392	Tai'an	2010	0	2	2	3	20.0283	760.23	19146.6	0.763163	86.94	41.6425
1393	Weihai	2010	0	2	2	2	22.6514	834.62	41061.6	1.42628	92.39	92.7833
1394	Rizhao	2010	0	2	2	3	13.2641	643.08	36679.9	1.78938	88.06	48.0715
1395	Laiwu	2010	0	2	2	3	12.725	564.07	22875.4	1.85969	89.62	29.6077
1396	Linyi	2010	0	2	1	3	31.6848	958.77	24166	1.53209	90.09	73.4082
1397	Dezhou	2010	1	2	2	2	34.7619	1158.79	24845.9	1.41625	89.16	105.411
1398	Liaocheng	2010	0	2	2	3	31.6037	802.01	14360.2	1.32858	81.93	41.4008
1399	Binzhou	2010	1	2	2	2	34.2859	611.05	25094	1.14415	90.02	91.5265
1400	Heze	2010	0	2	2	3	50.0572	1079.58	9974.71	0.977548	87.43	45.6271
1401	Zhengzhou	2010	1	2	1	3	39.4375	5049.5	25121.9	0.524673	97.2	73.9686
1402	Kaifeng	2010	0	2	2	2	59.6411	2363.81	12998.1	0.856296	86.25	82.6692
1403	Luoyang	2010	1	2	2	3	34.413	3053.49	21681.6	1.01554	94.34	82.0601
1404	Pingdingshan	2010	1	2	2	3	37.4562	2332.05	26891.1	3.27163	95.84	95.1699
1405	Anyang	2010	1	2	2	3	56.9289	1999.63	16783.5	1.55689	84.66	103.824
1406	Hebi	2010	0	2	2	2	39.9577	910.31	19980	3.45688	82.51	78.353
1407	Xinxiang	2010	0	2	2	3	32.3624	2928.61	17525.8	1.05874	89.54	57.7618
1408	Jiaozuo	2010	0	2	2	2	58.7687	1982.31	15611.5	1.3105	89.74	96.1808
1409	Puyang	2010	0	2	2	2	33.7415	2353.29	22607.1	3.48844	86	68.2253
1410	Xuchang	2010	0	2	2	1	37.0926	4270.1	22009.9	2.83715	96.94	98.6963
1411	Luohe	2010	0	2	2	3	46.044	1380.59	16780.3	3.10136	97.48	70.6576
1412	Sanmengxia	2010	0	2	2	1	30.5624	1479.8	19182.1	1.32399	81.14	64.7782
1413	Nanyang	2010	0	2	2	3	26.4552	951.59	13823.2	1.18833	62.38	34.6507
1414	Shangqiu	2010	0	2	2	3	39.1698	1042.96	8338.87	1.46851	98.36	28.1824
1415	Xinyang	2010	0	2	2	3	25.8925	409.88	12307.1	1.39938	81	27.0512
1416	Zhoukou	2010	0	2	2	2	31.4208	1992.94	12207.8	0.964481	84.1	35.3479
1417	Zhumadian	2010	0	2	2	2	43.1349	874.35	13058.6	1.45896	92.02	62.5778
1418	Wuhan	2010	1	3	1	3	42.0373	1915.56	33979.1	0.806622	94.96	192.206
1419	Huangshi	2010	0	3	2	2	70.8321	3013.92	23323.5	1.63839	58.19	182.528
1420	Shiyan	2010	0	3	2	2	47.7739	451.3	45221	1.73516	80	213.484
1421	Yichang	2010	1	3	2	3	24.225	292.87	32868.4	2.15374	89.59	79.6238
1422	Xiangfan	2010	1	3	2	3	36.9168	612.15	20409.9	1.39083	82.46	73.7343
1423	Ezhou	2010	1	3	2	3	33.6964	680.43	19812	2.05657	71.52	64.125
1424	Jingmen	2010	1	3	2	2	59.2697	315.61	20710.1	1.74138	59.41	113.398
1425	Xiaogang	2010	0	3	2	2	35.6947	936.96	0.0895752	1.12354	44.34	30.3861
1426	Jingzhou	2010	0	3	2	3	48.2235	715.48	13486.7	1.44016	80.07	66.4509
1427	Huanggang	2010	0	3	2	1	57.016	1012.98	11632	1.47861	56	77.9384
1428	Xianning	2010	0	3	2	2	47.1834	397.81	13455.9	1.31532	55.03	54.4376
1429	Suizhou	2010	0	3	2	2	35.1114	494.4	15291.2	1.09039	90.04	50.765
1430	Changsha	2010	1	3	1	3	33.3632	2520.65	47827.6	0.721961	92.07	192.074
1431	Zhuzhou	2010	1	3	2	2	47.5654	1508.6	33775.2	1.86818	81.22	202.255
1432	Xiangtan	2010	1	3	2	2	37.3818	1315.2	31247.4	1.78549	60	121.1
1433	Hengyang	2010	0	3	2	2	83.2405	1428.08	19426.2	1.34704	55	173.571
1434	Shaoyang	2010	0	3	2	2	94.758	1586.93	10844.6	1.17293	50.29	108.05
1435	Yueyang	2010	1	3	2	3	41.8044	879.94	27357	1.3904	86.03	148.65
1436	Changde	2010	0	3	2	3	17.2412	562.47	25722.6	1.49258	59.07	44.3901
1437	Zhangjiajie	2010	0	3	2	1	30.2332	181.9	13706	0.263114	44.38	39.8995
1438	Yiyang	2010	0	3	2	3	25.9111	689.46	12332.3	1.43348	70.58	28.701
1439	Chenzhou	2010	0	3	2	2	52.4205	320.61	21347.1	1.32762	61.8	121.164
1440	Yongzhou	2010	0	3	2	3	78.0314	380.51	11772.5	1.13278	45.27	76.4706
1441	Huaihua	2010	0	3	2	1	63.0501	546.25	15568.6	0.482854	69.1	133.617
1442	Loudi	2010	0	3	2	1	41.165	1097.89	22044.6	1.78818	50.25	96.6645
1443	Shaoguan	2010	0	3	2	2	34.6961	324.29	20075.5	0.836438	71.06	71.1615
1444	Shenzhen	2010	1	3	1	3	29.1411	1304.57	59894.7	0.895486	88.81	602.109
1445	Zhuhai	2010	0	3	1	3	46.6287	612.16	45221.9	1.28719	78.81	301.518
1446	Shantou	2010	0	3	1	3	42.398	2641.82	13307.6	1.4565	70.49	55.1535
1447	Foshan	2010	0	3	1	3	13.5678	976.54	52667.3	1.76812	79	115.856
1448	Jiangmen	2010	0	3	1	3	47.8898	760.18	31060.3	1.7813	82.55	171.616
1449	Zhanjiang	2010	0	3	2	3	21.878	891.45	28971.7	1.25969	49.38	61.4948
1450	Maoming	2010	0	3	2	3	18.815	1519.22	26019.5	1.43296	60.58	45.052
1451	Zhaoqing	2010	0	3	2	2	48.7679	704.33	33136	1.1394	70.54	195.77
1452	Huizhou	2010	0	3	1	3	37.4658	496.96	34363.2	1.80833	71.49	177.286
1453	Meizhou	2010	0	3	2	1	62.1747	1070.81	20202.7	1.57991	65	123.566
1454	Shanwei	2010	0	3	2	2	47.05	1311.08	14603.8	1.45931	51.65	63.0215
1455	Heyuan	2010	0	3	2	1	55.1392	861.3	19728.6	1.2377	89.32	154.522
1456	Yangjiang	2010	0	3	2	2	38.9646	904.44	20653.2	0.720141	56.4	81.1878
1457	Qingyuan	2010	0	3	2	2	49.8228	505.94	27170.6	1.88022	56.83	152.478
1458	Dongguang	2010	1	3	1	3	69.5922	738.9	37182.6	1.04454	91.05	911.08
1459	Zhongshan	2010	0	3	1	3	7.30409	828.78	41103.6	1.47986	90.05	50.7776
1460	Chaozhou	2010	0	3	2	1	75.109	2263.23	16436.3	0.898406	33.47	137.828
1461	Yunfu	2010	0	3	2	1	45.8066	396.72	17118.3	1.46565	63.11	75.2233
1462	Nanning	2010	0	3	1	3	55.2877	417.87	25187.9	0.60853	84.54	138.797
1463	Liuzhou	2010	0	3	1	3	83.055	1595.9	34016.9	2.5046	34.54	375.631
1464	Guilin	2010	0	3	2	2	53.1419	1340.18	19776.8	0.745548	81.56	132.026
1465	Wuzhou	2010	0	3	2	2	56.104	466.36	18130.2	1.12436	100	100.625
1466	Beihai	2010	1	3	2	2	35.798	644.93	18813	1.18965	44.7	79.9903
1467	Fangchenggang	2010	0	3	2	2	22.0102	191.41	23847.8	1.49065	35.82	49.5365
1468	Qinzhou	2010	0	3	2	3	28.8484	291.76	17475.5	0.704414	48.96	22.215
1469	Guigang	2010	0	3	2	3	82.669	536.22	7907.91	1.24316	82.85	57.8712
1470	Yulin	2010	1	3	2	3	39.623	809.27	11960.6	0.903676	88.96	50.2667
1471	Baise	2010	0	3	2	1	72.6317	94.84	16051.9	1.67814	43.13	129.779
1472	Hezhou	2010	0	3	2	3	22.3782	204.6	8606.39	1.77956	80	17.4655
1473	Hechi	2010	0	3	2	1	73.9199	143.8	14667.5	1.5692	76.77	106.36
1474	Laibin	2010	0	3	2	3	20.6617	246.52	11129.2	1.63047	34.28	20.264
1475	Chongzuo	2010	0	3	2	1	31.9348	123.08	11853.8	1.04206	18.62	35.2974
1476	Haikou	2010	1	3	2	3	53.7075	696.01	16506.3	0.344927	95.36	108.434
1477	Sanya	2010	1	3	2	2	66.9539	297.24	25359.5	0.326743	79.8	147.553
1478	Chongqing	2010	1	3	1	3	29.6362	592.44	16032.6	1.48256	83	56.3441
1479	Chengdu	2010	0	3	1	3	40.8518	2513.62	39888.1	0.795284	91.3	160.772
1480	Zigong	2010	1	2	2	3	24.87	1039.22	16173.9	2.04149	65.83	37.7342
1481	Panzhihua	2010	0	3	2	2	56.5359	341.97	28491.3	3.33966	26.18	176.395
1482	Luzhou	2010	0	3	2	3	45.708	688.18	14641.2	2.16402	44.52	61.648
1483	Deyang	2010	1	3	2	2	34.3986	1022.07	21530.6	2.35389	65.84	79.239
1484	Mianyang	2010	1	3	2	3	31.6076	778.34	18946	1.66657	51.2	63.2651
1485	Guangyuan	2010	0	3	2	2	33.1535	201.13	9046.7	1.18975	62.73	28.9337
1486	Suining	2010	0	3	2	3	24.952	802.24	7509.1	1.42162	77.75	17.0921
1487	Neijiang	2010	0	3	2	3	27.9199	901.53	10401.7	2.41839	63.1	26.8717
1488	Leshan	2010	0	3	2	3	23.3487	458.15	15855.3	2.44033	55.79	38.9304
1489	Nanchong	2010	0	3	2	3	44.1429	765.41	8261.57	1.62355	47.85	36.7077
1490	Meishan	2010	0	3	2	2	29.8338	642.15	12492.5	2.04582	50.9	34.8192
1491	Yibin	2010	0	3	2	2	27.8931	715.21	21359.2	2.6043	22.67	60.2176
1492	Guang'an	2010	0	3	2	3	14.3779	815.17	8867.29	1.4636	78.54	9.66376
1493	Dazhou	2010	0	3	2	1	56.7828	945.9	14313.4	1.88508	20.51	86.9902
1494	Ya'an	2010	0	3	2	1	76.9516	326.54	12628.5	1.25985	36.05	96.8804
1495	Bazhong	2010	0	3	2	3	25.6913	536.79	4680.8	0.667489	52.7	10.5343
1496	Ziyang	2010	0	3	2	3	18.566	667.12	12509.6	2.95093	89.05	19.6071
1497	Zunyi	2010	0	3	2	2	29.6309	642.08	14392.9	0.688449	55.76	53.9402
1498	Kunming	2010	0	3	1	3	35.8101	633.96	22118.7	0.725096	83.56	121.142
1499	Qujing	2010	1	3	2	2	23.0276	448.81	23713.8	1.75043	43.35	58.0344
1500	Yuxi	2010	1	3	2	1	9.64827	494.02	51172.1	3.68225	88.86	47.5605
1501	Baoshan	2010	0	3	2	2	35.566	179.6	6672.16	0.747401	30.58	24.1111
1502	Zhaotong	2010	0	3	2	2	18.1511	371.79	8785.17	1.35557	53.55	15.2738
1503	Lijiang	2010	0	3	2	1	55.8386	121.35	14667.7	0.564214	91.13	105.187
1504	Simao	2010	0	3	2	1	36.4458	72.56	11076.1	0.845103	66.08	37.7441
1505	Xi'an	2010	1	2	1	3	27.5289	1570.77	21883.6	0.794308	72.29	69.4872
1506	Tongchuan	2010	0	2	2	2	16.1972	315.79	12049.3	2.04961	70.01	19.084
1507	Baoji	2010	1	2	2	3	25.7255	399.55	18262.8	2.26024	86.37	50.2731
1508	Xianyang	2010	1	2	2	2	18.3509	1711.39	22453.7	2.08266	69.9	42.1444
1509	Weinan	2010	0	2	2	2	91.9259	800	9671.41	0.713911	67.24	69.1851
1510	Yan'an	2010	1	2	2	1	19.8151	128.85	16008.3	0.921684	86.96	32.5404
1511	Hanzhong	2010	0	2	2	2	38.9225	992.27	10475.9	0.745825	54	40.2574
1512	Yulin	2010	1	2	2	2	10.618	73.93	24468.2	1.39903	90.04	26.0644
1513	Ankang	2010	0	2	2	3	61.4824	276.63	6749.17	0.665257	11.79	35.7823
1514	Lanzhou	2010	0	2	1	3	48.515	1288.97	25024.7	0.871747	70.22	119.01
1515	Jiayuguang	2010	0	1	2	1	62.7188	74.28	49072.4	4.33297	83.12	311.927
1516	Jinchang	2010	0	1	2	1	88.5115	67.64	46185.4	6.89254	93.82	432.615
1517	Baiyin	2010	0	1	2	1	83.688	143.7	24154.7	2.24591	52.03	201.501
1518	Tianshui	2010	0	2	2	3	33.9221	221.41	8801.56	1.08549	65.02	27.7568
1519	Wuwei	2010	1	1	2	3	24.3351	200.83	7451.59	1.19612	86	20.9918
1520	Zhangye	2010	1	1	2	2	30.9974	122.74	10856.2	0.774458	50.27	32.744
1521	Jiuquan	2010	0	1	2	1	31.5929	119.26	19325.4	1.62489	37.2	61.0698
1522	Qingyang	2010	1	2	2	1	13.4696	359.54	12920.9	1.24459	32.71	18.3468
1523	Dingxi	2010	0	1	2	1	26.6049	110.41	3659.91	0.494439	57.23	10.911
1524	Longnan	2010	0	2	2	2	7.54879	123.89	4939.88	0.304661	19.8	3.74009
1525	Xining	2010	1	2	2	3	47.1629	2815.83	21535.9	0.714089	58.71	113.466
1526	Yinchuan	2010	1	2	2	2	37.2036	410.47	24001.8	0.696183	91.8	110.953
1527	Shizuishan	2010	1	1	2	1	31.1888	201.55	25553.7	1.9711	83.55	82.5839
1528	Wuzhong	2010	1	2	2	1	58.687	298.03	10460	1.2636	89.6	61.3919
1529	Guyuan	2010	1	2	2	1	22.9047	163.38	5417.28	0.309687	60	12.3128
1530	Zhongwei	2010	1	2	2	1	7.56568	57.58	11893.7	0.874972	77.83	8.89113
1531	Wulumuqi	2010	1	1	1	3	37.2655	245.18	26486.6	0.836704	57.34	127.455
1532	Kelamayi	2010	0	1	2	1	27.7583	39.29	73443.4	9.1957	92.12	318.502
1533	Beijing	2011	1	2	1	3	18.101	990.51	45769.5	0.29864	81.68	131.194
1534	Tianjin	2011	1	2	1	3	17.3729	1103.26	34831.7	1.12685	86.75	91.2446
1535	Shijiazhuag	2011	1	2	1	3	45.4326	8063.4	26270.6	0.461471	95.46	139.931
1536	Tangshan	2011	0	2	1	3	17.3169	2497.65	46207.6	1.75531	94.61	79.9968
1537	Qinhuangdao	2011	0	2	2	2	39.1147	1699.81	31887.3	0.60974	92.53	136.686
1538	Handan	2011	1	2	2	3	47.9585	3429.26	21715.1	1.26706	97.48	111.001
1539	Xingtai	2011	0	2	2	2	62.6521	5317.04	15533	1.77246	83.93	122.799
1540	Baoding	2011	0	2	2	3	23.912	3463.46	30548	1.93834	91.97	78.4459
1541	Zhangjiakou	2011	0	2	2	2	40.4054	2391.76	18859.2	1.2138	88.7	92.1135
1542	Chengde	2011	0	2	2	2	47.6322	759.14	20190.8	1.57038	79.12	105.026
1543	Cangshou	2011	0	2	2	2	13.4061	2963.39	46577.2	1.23346	100	68.9852
1544	Langfang	2011	1	2	2	2	22.6034	2772.6	20112.7	0.63421	87.09	56.2099
1545	Hengshui	2011	0	2	2	1	34.7023	1819.41	19918.4	2.08401	87.56	75.171
1546	Taiyuan	2011	1	2	1	3	32.0419	1923.25	29148.2	0.797033	84	113.313
1547	Datong	2011	0	2	2	3	22.5454	752.64	20595.5	1.20147	82.53	51.9732
1548	Yangquan	2011	1	2	2	2	41.1087	1068.71	25688.5	1.32576	83.3	109.785
1549	Changzhi	2011	0	2	2	2	55.4652	2188.92	19624.2	1.02272	89.6	114.514
1550	Jincheng	2011	1	2	2	1	20.4421	2476.92	20088.3	0.82188	95	55.5367
1551	Shuozhou	2011	0	2	2	2	10.2926	173.78	88687.2	1.93863	97.53	37.493
1552	Jinzhong	2011	0	2	2	2	27.7155	454.02	14682.4	0.773628	92.21	43.5452
1553	Yuncheng	2011	0	2	2	2	27.0883	563.13	10884.2	0.499676	92.8	29.4152
1554	Xinzhou	2011	0	2	2	2	40.9578	269.37	9207.83	0.76512	34.76	38.7453
1555	Linfen	2011	0	2	2	2	18.5095	638.75	12911.8	0.748457	80.69	26.9203
1556	Lvliang	2011	0	2	2	1	19.3777	210.75	14789.4	1.49631	67	32.695
1557	Huhehaote	2011	1	2	1	3	21.0174	596.4	47743.8	0.37859	95.5	103.6
1558	Baotou	2011	1	1	1	3	27.6448	485.43	47100	1.13187	82.23	186.372
1559	Wuhai	2011	0	1	2	2	122.175	308.67	35162.2	2.77236	85.78	428.651
1560	Chifeng	2011	0	2	2	3	47.8444	172.67	18577.4	1.64311	97.12	88.5925
1561	Tongliao	2011	0	2	2	2	101.502	273.95	22770.3	2.42716	96.34	230.272
1562	E'erduosi	2011	1	1	2	1	8.0855	103.95	50492.1	0.6491	92.43	92.1673
1563	Hulunbei'er	2011	0	2	2	1	13.5666	189.79	28633.4	0.993591	77.4	38.7546
1564	Bayanzhuo'er	2011	0	1	2	2	22.6483	240.02	14801.6	1.5073	87.34	32.2832
1565	Wulanchabu	2011	0	1	2	1	61.3012	2034.9	14192	1.21849	50.2	102.244
1566	Shenyang	2011	0	2	1	3	24.218	1495.45	35072.1	1.02245	85.2	103.394
1567	Anshan	2011	1	2	1	3	51.4493	2425.68	39701.6	1.25973	71.22	201.394
1568	Fushun	2011	0	3	2	3	47.7061	1022.88	27254.4	1.80728	67.79	134.068
1569	Benxi	2011	1	3	2	2	57.1483	625.36	32486.9	2.00337	88.22	211.17
1570	Dandong	2011	0	3	2	2	35.359	837.41	16284.9	0.972024	85.26	57.5381
1571	Yingkou	2011	0	2	2	2	19.4962	1297.72	31547.2	1.5261	64.04	69.7036
1572	Fuxin	2011	0	2	2	2	67.1976	1593.27	17468.1	1.71433	81	100.999
1573	Liaoyang	2011	1	2	2	2	65.7849	1182.78	27811.6	1.35178	83.4	184.246
1574	Panjin	2011	0	2	2	2	21.8109	2448.12	45003.9	2.8488	100	113.364
1575	Tieling	2011	0	2	2	1	33.6676	676.33	25126.7	1.99383	89.87	84.5291
1576	Chaoyang	2011	0	2	2	2	31.4263	533.39	15988.5	1.07445	77.9	50.4119
1577	Huludao	2011	0	2	2	2	30.2148	430.81	15753.5	1.83566	42.53	47.8103
1578	Changchun	2011	1	2	1	3	26.8488	761.75	36476.5	1.45719	87.26	91.2144
1579	Jilin	2011	0	3	1	3	41.9849	503.41	30006	1.19319	93.9	126.301
1580	Siping	2011	1	2	2	2	35.3283	563.44	15737.9	1.46784	70.38	62.6403
1581	Liaoyuan	2011	1	2	2	1	25.0205	1071.04	26196.1	1.4429	91.64	68.8795
1582	Tonghua	2011	0	3	2	1	29.5373	598.12	22164	2.31771	88.02	65.5605
1583	Baishan	2011	0	3	2	2	24.4342	221.92	18799.6	1.98548	85.39	46.5936
1584	Songyuan	2011	0	2	2	2	22.5014	450.79	37047	2.78016	91.64	82.7471
1585	Baicheng	2011	0	2	2	2	53.2406	201.98	12070.6	0.853669	39.35	63.8431
1586	Ha'erbin	2011	1	3	1	3	27.1647	665.4	31536	0.798162	73.94	85.6946
1587	Qiqiha'er	2011	0	2	2	3	31.7019	322.34	19412.5	1.05234	67.46	58.9552
1588	Jixi	2011	0	3	2	2	82.9384	379.57	10846.2	1.87564	50	90.2635
1589	Hegang	2011	0	3	2	2	49.6372	147.88	15006.3	2.66408	43.88	74.4874
1590	Daqing	2011	1	2	1	3	17.3977	264.07	127078	6.03688	92.23	219.8
1591	Yichun	2011	0	3	2	2	64.0137	41.06	9364.65	1.37553	85	59.6015
1592	Jiamusi	2011	0	3	2	2	49.6687	435.25	18908.7	0.695698	59	94.1544
1593	Qitaihe	2011	0	3	2	2	30.6659	156.61	20343.7	2.4213	85.2	66.3047
1594	Mudanjiang	2011	0	3	2	2	168.749	331.21	14042.7	0.905513	67.56	257.754
1595	Heihe	2011	0	3	2	1	24.1331	13.13	9828	0.553427	63.9	31.1053
1596	Shanghai	2011	1	3	1	3	29.7544	2619.96	46421.4	0.704955	84.1	230.477
1597	Nanjing	2011	1	3	1	3	44.7353	1165.35	36803.8	0.793375	59.5	215.486
1598	Wuxi	2011	0	3	1	3	25.1716	1457.52	48045	1.08843	84.8	179.678
1599	Xuzhou	2011	1	2	1	3	21.2321	1039.07	32937.9	1.27403	80.2	68.2388
1600	Changzhou	2011	0	3	1	3	22.5054	1229.75	39285.7	1.32622	80.3	127.996
1601	Suzhou	2011	0	3	1	3	28.5148	759.26	47648.8	1.19072	71.1	226.578
1602	Nantong	2011	1	3	1	3	26.7329	1392.18	33437.3	1.24357	85.5	96.5156
1603	Lianyungang	2011	0	2	2	2	42.2577	796.08	23096	1.18837	66.4	107.665
1604	huai'an	2011	0	2	2	3	39.2621	904.82	19050.7	1.22454	45.8	70.1741
1605	Yancheng	2011	0	2	2	3	19.4383	885.71	23125.2	1.48576	59.3	44.0146
1606	Yangzhou	2011	0	3	1	3	18.9948	978.09	34813	1.42879	78.6	69.1217
1607	Zhenjiang	2011	0	3	2	3	32.2361	957.95	40726.8	1.25086	68	152.594
1608	Taizhou	2011	1	2	2	2	20.8319	1297.03	35887.6	1.65669	53.9	79.3373
1609	Suqian	2011	0	2	2	3	24.4939	771.92	15531.6	1.40249	72.5	33.909
1610	Hangzhou	2011	0	3	1	3	17.9986	1435.27	46756.1	0.836765	93.61	119.6
1611	Ningbo	2011	0	3	1	3	23.6099	912.84	54174.4	1.23586	72.85	199.19
1612	Wenzhou	2011	0	3	1	3	35.356	1245.32	48460.9	0.958333	71.36	170.176
1613	Jiaxing	2011	0	3	2	2	26.0068	870.66	29131.9	1.14617	85.32	108.149
1614	Huzhou	2011	0	3	2	3	24.3767	698.46	26635.8	1.34887	86.85	80.5489
1615	Shaoxing	2011	0	3	2	2	39.4592	1802.76	43903	0.859894	81.94	172.833
1616	Jinhua	2011	0	3	2	2	24.5457	456.66	22609.2	0.903698	80.45	63.953
1617	Quzhou	2011	0	3	2	2	33.0466	353.38	24186.7	1.32667	76.47	79.6875
1618	Zhoushan	2011	1	3	2	2	15.3969	681.32	42263.2	0.939236	63.09	64.7857
1619	Taizhou	2011	0	3	1	3	26.728	1014.65	26887	0.99419	81.62	87.9987
1620	Lishui	2011	0	3	2	1	39.4892	193.21	24059.5	0.875804	71.61	148.69
1621	Hefei	2011	1	2	1	3	28.7716	3651.17	48463.3	1.19912	93.72	147.536
1622	Wuhu	2011	0	3	2	3	36.7299	1165.16	37821	2.1664	84.53	138.743
1623	Bengbu	2011	0	2	2	2	79.0629	1542.6	20530.7	1.59249	88.35	162.6
1624	Huainan	2011	0	3	2	3	45.709	1077.51	13278.7	2.09196	58.83	60.5931
1625	Ma'anshan	2011	0	3	2	2	57.6303	1879.41	49261.8	2.56851	88.3	307.089
1626	Huaibei	2011	1	2	2	3	29.0809	1455.92	17452.1	2.78751	87.3	50.533
1627	Anqing	2011	0	3	2	2	54.3535	895.25	21642.9	1.27174	86.17	117.796
1628	Huangshan	2011	0	3	2	1	39.3835	187.53	18760.9	0.941841	92.43	73.7585
1629	Chuzhou	2011	0	3	2	2	35.1685	383.9	17511.8	2.03179	89.2	65.2505
1630	Fuyang	2011	0	2	2	3	44.3867	1139.43	6596.33	0.935915	78.59	29.0624
1631	Suzhou	2011	0	2	2	3	42.2841	655.16	8274.34	1.19719	65.39	34.8004
1632	Lu'an	2011	0	2	2	3	52.9472	523.03	5393.32	1.05467	80.37	28.2978
1633	Bozhou	2011	0	2	2	3	27.1901	735.94	6319.8	1.23211	85.13	17.1856
1634	Chizhou	2011	0	3	2	2	26.4253	274.47	13845.9	1.44716	87.36	36.4072
1635	Yicheng	2011	0	3	2	2	26.1611	329.87	9613.74	0.9588	84.47	25.0808
1636	Fuzhou	2011	0	3	1	3	31.2979	1063.94	29178.4	0.602775	95.6	141.847
1637	Xiamen	2011	0	3	1	3	28.5215	1177.75	32996.9	1.06528	90.4	182.078
1638	Putian	2011	1	3	2	3	20.0643	949.43	20919.8	1.9551	82.6	37.7875
1639	Sanming	2011	0	3	2	1	51.8949	239.56	34024.6	1.34085	80.37	235.426
1640	Quanzhou	2011	1	3	2	3	30.4772	1156.95	32082.5	1.48512	82.62	137.132
1641	Zhangzhou	2011	0	3	2	2	20.3308	1397.01	28341.7	1.02556	88.3	72.8393
1642	Nanping	2011	0	3	2	1	26.1207	186.95	20923.5	1.72586	75.04	51.5091
1643	Longyan	2011	0	3	2	1	22.8142	181.37	35572.6	2.37102	82.23	111.481
1644	Ningde	2011	0	3	2	1	20.444	293.88	16757.5	0.693996	80.17	32.7434
1645	Nanchang	2011	1	3	1	3	43.8214	3576.5	34818	1.41638	93	173.774
1646	Jingdezhen	2011	1	3	2	1	30.4449	797.93	30970.2	2.12321	76.5	102.721
1647	Pingxiang	2011	1	3	2	2	24.5242	798.33	22842.3	2.29049	77.3	55.8005
1648	Jiujiang	2011	0	3	2	2	28.0058	1074.75	40644.5	1.0186	82.35	118.927
1649	Xinyu	2011	0	3	2	2	17.9893	482.5	36956.4	2.41951	97.73	65.2723
1650	Yingtan	2011	0	3	2	1	37.0231	1686.03	26030	1.07978	86.1	90.4803
1651	Ganzhou	2011	0	3	2	2	41.4008	1111.99	17926.7	1.21694	38.97	83.0046
1652	Ji'an	2011	0	3	2	2	49.5069	398.41	10644.6	1.10203	66.48	57.0962
1653	Yichun	2011	0	3	2	3	55.9454	425.28	6398.23	0.916859	98.49	34.9118
1654	Fuzhou	2011	0	3	2	3	38.1983	550.09	10127.4	2.01517	73	36.2982
1655	Shangrao	2011	0	3	2	1	53.964	1091.89	15477.6	0.801094	90.29	86.5842
1656	Ji'nan	2011	0	2	1	3	20.0106	1072.89	36984.4	0.590052	86.55	92.3526
1657	Qingdao	2011	0	2	1	3	18.7143	1972.17	65965	0.910594	96.69	123.093
1658	Zibo	2011	1	2	1	3	25.5854	945.56	38590.9	1.67699	93.08	96.7984
1659	Zaozhuang	2011	0	2	2	3	20.9398	733.72	18386.1	2.27315	92.65	37.7087
1660	Dongying	2011	0	2	1	2	11.4946	254.4	80668.7	3.04223	92.11	114.356
1661	Yantai	2011	0	2	1	3	14.6589	659.96	57925.3	1.5009	92.52	84.755
1662	Weifang	2011	0	2	2	3	31.1384	708.95	22239.9	1.59773	75	82.1323
1663	Ji'ning	2011	0	2	2	3	34.6056	1087.25	30314.7	1.57638	89.92	109.347
1664	Tai'an	2011	0	2	2	3	20.5478	762	18051.4	0.890189	90.79	41.6226
1665	Weihai	2011	0	2	2	2	23.161	839	19065.3	1.34303	93.89	92.8221
1666	Rizhao	2011	0	2	2	3	12.6206	647.42	39727.9	1.85723	90.15	49.3226
1667	Laiwu	2011	0	2	2	3	13.0672	565.23	22858.2	1.84881	91.32	30.6299
1668	Linyi	2011	0	2	1	3	29.3852	1076.54	20156.1	1.43745	94.25	63.9004
1669	Dezhou	2011	1	2	2	2	30.3726	1123.19	18667.3	1.37222	86.22	99.0083
1670	Liaocheng	2011	0	2	2	3	32.2317	811.72	14479.4	1.41854	90.3	46.3706
1671	Binzhou	2011	1	2	2	2	41.0601	618.25	25712.2	1.14415	92.35	112.345
1672	Heze	2011	0	2	2	3	29.4443	1082.61	11187.6	0.917647	80.57	29.0927
1673	Zhengzhou	2011	1	2	1	3	32.0133	5245.54	25822	0.704834	97.2	67.5444
1674	Kaifeng	2011	0	2	2	2	68.1324	2385.91	13486.8	0.801683	86.25	95.1852
1675	Luoyang	2011	1	2	2	3	36.3112	3096.14	21826.4	1.20022	94.34	94.228
1676	Pingdingshan	2011	1	2	2	3	39.4872	2363.43	24836.5	3.13018	92.97	97.192
1677	Anyang	2011	1	2	2	3	27.2213	2041.54	16639.7	1.3193	84.66	47.5518
1678	Hebi	2011	0	2	2	2	43.0503	923.42	18417.2	3.244	82.79	81.1643
1679	Xinxiang	2011	0	2	2	3	33.8802	2919.6	20495.4	0.99594	88.96	70.9533
1680	Jiaozuo	2011	0	2	2	2	57.8281	1997.41	16133.8	1.29807	85.6	95.0295
1681	Puyang	2011	0	2	2	2	33.5212	2386.51	22544.8	2.88562	86	72.1884
1682	Xuchang	2011	0	2	2	1	36.017	4297.94	24401.3	2.52994	96.96	105.516
1683	Luohe	2011	0	2	2	3	44.1051	1380.49	17143.7	3.06278	93.06	69.6804
1684	Sanmengxia	2011	0	2	2	1	28.7987	1507.07	19409	1.24793	74.62	61.2416
1685	Nanyang	2011	0	2	2	3	27.186	961.4	13792.9	1.18093	65.13	35.5916
1686	Shangqiu	2011	0	2	2	3	39.7789	1056.39	8356.65	1.57825	91.35	29.208
1687	Xinyang	2011	0	2	2	3	23.2744	413.79	12989.2	1.35987	74.84	24.943
1688	Zhoukou	2011	0	2	2	2	35.2188	2287.36	11009.5	1.13126	85	38.1463
1689	Zhumadian	2011	0	2	2	2	43.9041	673.48	12568.6	1.4941	80.41	50.272
1690	Wuhan	2011	1	3	1	3	47.3103	1895.4	34534.6	0.864429	92.2	233.018
1691	Huangshi	2011	0	3	2	2	59.9609	3017.3	30011.8	2.23833	74.49	194.224
1692	Shiyan	2011	0	3	2	2	39.395	449.2	32892.8	1.73967	80.1	185.765
1693	Yichang	2011	1	3	2	3	22.1649	293.29	34040.4	2.44838	90.1	86.3162
1694	Xiangfan	2011	1	3	1	3	32.8451	613.43	24709.6	2.17917	87.01	76.9951
1695	Ezhou	2011	1	3	2	3	16.2851	686.51	21453.2	2.0694	87.6	33.5283
1696	Jingmen	2011	1	3	2	2	52.3197	280.13	23209.2	1.64151	65.6	116.791
1697	Xiaogang	2011	0	3	2	2	40.0749	937.25	8721.96	1.0947	56.72	33.2427
1698	Jingzhou	2011	0	3	2	3	48.0288	744.52	14356	1.62096	80.07	71.8811
1699	Huanggang	2011	0	3	2	1	81.663	69.3	13944.9	1.37314	76.8	115.679
1700	Xianning	2011	0	3	2	2	36.3993	403.99	14328.9	1.5308	82	43.75
1701	Suizhou	2011	0	3	2	2	35.2246	500.68	17020.4	1.10784	87	56.2236
1702	Changsha	2011	1	3	1	3	30.8189	1553.87	45746	0.892432	94.35	172.588
1703	Zhuzhou	2011	1	3	2	2	45.8366	1741.31	32335.6	1.9529	87.25	184.936
1704	Xiangtan	2011	1	3	2	2	32.5192	1341.34	32018.7	2.00862	60	118.709
1705	Hengyang	2011	0	3	2	2	110.185	1435.75	19962.3	1.50298	66.1	251.885
1706	Shaoyang	2011	0	3	2	2	85.9852	1595.64	11393.9	1.25631	63.31	106.193
1707	Yueyang	2011	1	3	2	3	55.5268	905.38	30084.3	1.67589	86.11	182.553
1708	Changde	2011	0	3	2	3	17.0904	568.57	27682.8	1.56112	66.91	47.6594
1709	Zhangjiajie	2011	0	3	2	2	43.719	189.25	14451.8	0.269038	60	59.8842
1710	Yiyang	2011	0	3	2	3	24.4681	723.99	13296.3	1.65706	80	30.2836
1711	Chenzhou	2011	0	3	2	2	37.1016	323.02	21867.1	1.14581	71	92.3829
1712	Yongzhou	2011	0	3	2	3	79.7475	366.67	12531	1.18354	71.2	87.7253
1713	Huaihua	2011	0	3	2	1	62.2063	545.8	15114.2	0.519671	73.35	142.967
1714	Loudi	2011	0	3	2	1	41.1059	1103.29	23955.5	1.9172	50	104.191
1715	Guangzhou	2011	0	3	1	3	32.5688	1746.86	52857.2	0.562391	79.43	284.551
1716	Shaoguan	2011	0	3	2	2	36.241	325.82	19187.8	0.887914	87.6	78.1818
1717	Shenzhen	2011	1	3	1	3	27.5495	1344.88	56253.6	0.868037	93.97	602.762
1718	Zhuhai	2011	0	3	1	3	46.1119	619.58	45745.3	1.26564	86.84	311.358
1719	Shantou	2011	0	3	1	3	42.7311	2668.76	12048.9	1.17457	68.3	52.7337
1720	Foshan	2011	0	3	1	3	14.272	986.83	46462.6	1.83979	97.72	127.652
1721	Zhanjiang	2011	0	3	2	3	20.1026	907.05	28577.9	1.30431	64.94	59.6731
1722	Maoming	2011	0	3	2	3	14.8905	1553.2	23821.2	1.46513	91.19	35.9278
1723	Zhaoqing	2011	0	3	2	2	48.2604	713.52	33377.4	1.34734	76.8	212.757
1724	Huizhou	2011	0	3	1	3	34.578	510.47	29434.8	1.91547	91.54	174.378
1725	Meizhou	2011	0	3	2	1	77.182	1073.49	18604	1.40687	71.02	171.688
1726	Shanwei	2011	0	3	2	2	43.626	1355.1	15500.4	1.62518	69.11	65.2919
1727	Heyuan	2011	0	3	2	1	57.5258	853.05	20203.6	1.25651	89.38	175.728
1728	Yangjiang	2011	0	3	2	2	34.4097	882.9	21272.5	0.84813	60.56	72.3837
1729	Qingyuan	2011	0	3	2	2	53.7946	510.49	23274.1	1.44519	66.16	154.29
1730	Dongguang	2011	1	3	1	3	71.8913	751.1	29277.9	1.00645	79.1	938.49
1731	Zhongshan	2011	0	3	1	3	6.86644	837.39	35668.4	1.34192	90.09	50.9091
1732	Chaozhou	2011	0	3	2	1	99.5561	2266.45	12593	0.874168	86	162.051
1733	Jieyang	2011	0	3	2	2	37.9779	3900.55	18192.4	1.46603	70.5	72.8329
1734	Yunfu	2011	0	3	2	1	42.4265	401.05	16982.9	1.54017	63.11	74.3137
1735	Nanning	2011	0	3	1	3	55.1524	421.08	27002	0.632392	92.92	148.365
1736	Liuzhou	2011	0	3	1	3	87.4275	1122.81	34425.4	2.46805	38.8	404.72
1737	Guilin	2011	0	3	2	2	60.8563	1346.37	24019.3	0.763371	83.97	151.156
1738	Wuzhou	2011	0	3	2	2	38.7373	468.06	22603.7	1.58295	100	85.0973
1739	Fangchenggang	2011	0	3	2	2	19.8516	192.23	27261	1.64112	38.29	52.1218
1740	Guigang	2011	0	3	2	3	30.4014	538.5	7945.95	1.17389	24.93	20.8634
1741	Yulin	2011	1	3	2	3	41.1436	825.58	12509.6	0.910794	99.06	52.8461
1742	Baise	2011	0	3	2	1	67.3783	86.69	17367.5	1.82336	55.35	136.429
1743	Hezhou	2011	0	3	2	3	22.6304	183.51	9098.93	1.86012	80	19.905
1744	Hechi	2011	0	3	2	1	39.9374	144.62	13061	1.41971	45.65	54.5858
1745	Laibin	2011	0	3	2	3	18.0442	249.52	13681.1	1.85961	71.1	20.753
1746	Haikou	2011	1	3	2	3	55.9961	704.51	17332.7	0.36478	96.1	119.514
1747	Sanya	2011	1	3	2	2	61.8413	303.13	22071.4	0.338999	81.7	146.764
1748	Chongqing	2011	1	3	1	3	26.8936	679.93	19222.9	1.48485	87	50.6924
1749	Chengdu	2011	0	3	1	3	31.7592	2508.2	28976.2	0.827913	96.73	129.838
1750	Zigong	2011	1	2	2	3	26.2771	1045.36	17798.3	2.15634	86.01	41.6155
1751	Panzhihua	2011	0	3	2	2	54.9664	342.22	28394.5	3.51055	25.13	178.683
1752	Luzhou	2011	0	3	2	3	45.3474	690.43	15655.2	2.50706	27.2	66.3723
1753	Deyang	2011	1	3	2	2	34.9739	1043.98	22015.8	2.49392	68.99	83.7075
1754	Mianyang	2011	1	3	2	3	31.8464	783.44	18367.9	1.89285	89.16	68.1789
1755	Guangyuan	2011	0	3	2	2	33.3319	202.55	9407.25	1.4837	86.8	32.3922
1756	Suining	2011	0	3	2	3	26.9154	809.44	8638.37	1.60646	83.15	19.8946
1757	Neijiang	2011	0	3	2	3	26.4922	904.72	11644.5	2.69026	66.87	27.2183
1758	Leshan	2011	0	3	2	3	20.1376	459.59	17091.4	2.66587	67.21	36.1818
1759	Nanchong	2011	0	3	2	3	41.452	769.33	8973.68	1.79103	57.6	37.037
1760	Meishan	2011	0	3	2	2	30.8823	647.41	13003.4	2.08807	77.2	38.3179
1761	Yibin	2011	0	3	2	3	21.1712	676.62	17946.4	2.61806	73.4	35.8454
1762	Guang'an	2011	0	3	2	3	16.4114	817.71	10454.6	1.63464	95.44	11.7357
1763	Dazhou	2011	0	3	2	1	57.9624	970.11	14422	2.05194	23.52	92.8241
1764	Ya'an	2011	0	3	2	1	40.0423	326.43	13146.9	1.28367	25.92	53.9481
1765	Bazhong	2011	0	3	2	3	27.9643	539.81	5214.04	0.855875	85.45	11.945
1766	Ziyang	2011	0	3	2	3	18.5328	670.67	14037.8	3.12409	74.14	21.3333
1767	Guiyang	2011	0	3	1	3	42.72	931.09	17182.8	0.63927	95.3	100.769
1768	Liupanshui	2011	0	3	2	1	29.7782	1044.75	17474.3	1.29671	68.6	64.7284
1769	Zunyi	2011	0	3	2	2	29.185	664.74	14962.3	0.707126	66.64	55.2114
1770	An'shun	2011	0	3	2	2	31.8104	513.56	7666.22	0.814147	92.04	21.2686
1771	Kunming	2011	0	3	1	3	37.4076	592.61	24358.8	0.768293	99.61	129.119
1772	Qujing	2011	1	3	2	2	20.9731	454.02	24818.3	1.86391	83.05	55.0496
1773	Yuxi	2011	1	3	2	1	9.89789	496.02	51533	4.17846	71	50.8635
1774	Baoshan	2011	0	3	2	2	35.0953	180.66	6817.16	0.829402	31.83	24.663
1775	Zhaotong	2011	0	3	2	2	21.7053	377.63	9343.54	1.43111	45.3	18.9835
1776	Lijiang	2011	0	3	2	1	43.5939	121.83	14775.8	0.628349	85	84.8366
1777	Simao	2011	0	3	2	1	38.7961	73.69	9210.55	0.953036	50.63	41.3907
1778	Lincang	2011	0	3	2	1	47.6296	119.16	6595.17	0.656995	73.61	32.2785
1779	Xi'an	2011	1	2	1	3	26.1973	1587.86	22786.9	0.806584	72.29	68.4494
1780	Tongchuan	2011	0	2	2	2	16.5952	315.79	13147.6	2.2166	80	21.3947
1781	Baoji	2011	1	2	2	3	22.4823	395.26	21410.4	2.53021	87.63	48.381
1782	Xianyang	2011	1	2	2	2	55.8262	1717.23	24169.6	2.36723	70.61	140.882
1783	Weinan	2011	0	2	2	2	70.6965	806.8	11297.8	1.17412	73.2	68.8426
1784	Yan'an	2011	1	2	2	1	21.1289	130.03	14947.8	0.887575	86.96	35.671
1785	Hanzhong	2011	0	2	2	2	38.7171	998.38	11416.9	0.804109	97.4	42.6486
1786	Yulin	2011	1	2	2	2	12.2172	75.75	22981.4	1.63435	86.57	33.5581
1787	Ankang	2011	0	2	2	3	18.5745	277.73	7101.15	0.83243	51.35	11.3327
1788	Shangluo	2011	0	2	2	2	20.5496	207.6	7054.66	1.09309	83	13.8739
1789	Lanzhou	2011	0	2	1	3	51.6129	1281.25	22240.5	0.862479	70.83	140.607
1790	Jinchang	2011	0	1	2	1	97.0119	76.08	42958.5	6.39565	59.74	415.391
1791	Baiyin	2011	0	1	2	2	80.0567	144.25	25161.2	2.31135	53.56	204.622
1792	Tianshui	2011	0	2	2	3	32.1645	222.26	9412.59	1.15233	63.68	27.7557
1793	Wuwei	2011	1	1	2	3	18.7038	202.4	9097.82	1.23272	65	16.7607
1794	Zhangye	2011	1	1	2	2	29.0185	121.93	11877.9	0.858891	55.38	33.9072
1795	Pingliang	2011	0	2	2	2	19.5465	276.65	8841.62	0.847899	18.3	16.3993
1796	Jiuquan	2011	0	1	2	1	26.6309	120.02	18505.2	1.59952	59.9	52.2906
1797	Qingyang	2011	1	2	2	1	8.31412	367.17	20051.3	2.40261	41.2	17.2131
1798	Dingxi	2011	0	1	2	1	24.7953	111.2	4883.54	0.542376	28.64	10.8511
1799	Yinchuan	2011	1	2	2	2	35.1781	420.68	22904.4	0.715343	92	108.282
1800	Shizuishan	2011	1	1	2	1	33.0085	191.87	27699.5	2.15045	77.94	95.2735
1801	Wuzhong	2011	1	2	2	1	54.7693	302.36	11380.2	1.37827	47.67	62.0573
1802	Guyuan	2011	1	2	2	1	18.8685	102.18	7025.29	0.426609	68.9	12.0044
1803	Zhongwei	2011	1	2	2	1	9.20576	57.77	13122	0.919443	95.9	11.9395
1804	Wulumuqi	2011	1	1	1	3	34.2878	254.35	28702.4	0.834136	77.83	127.397
1805	Kelamayi	2011	0	1	2	1	28.3852	48.9	69743.8	8.80197	92.16	325.212
1806	Beijing	2012	1	2	1	3	17.8645	1006.4	45481	0.29209	83	130.164
1807	Tianjin	2012	1	2	1	3	18.055	1098.12	33467	1.07665	87.4	95.0375
1808	Shijiazhuag	2012	1	2	1	3	45.1825	8074.84	25176	0.352229	95.86	135.698
1809	Tangshan	2012	0	2	1	3	18.7806	2637.99	45124.9	1.67424	94.81	80.5231
1810	Qinhuangdao	2012	0	2	2	2	44.2978	2408.54	27286.5	0.623291	92.54	147.826
1811	Handan	2012	1	2	2	3	53.099	3552.52	21424.6	1.18312	97.51	111.661
1812	Xingtai	2012	0	2	2	2	51.9518	7415.65	14270.5	1.48813	84.01	79.2966
1813	Baoding	2012	0	2	2	3	25.9183	3472.12	30704.4	2.03597	92	86.2235
1814	Zhangjiakou	2012	0	2	2	2	41.049	2393.88	19143.8	1.13544	91.31	93.1556
1815	Chengde	2012	0	2	2	2	47.5859	762.39	19262.7	1.48719	81.45	100.459
1816	Cangshou	2012	0	2	2	2	13.8003	2926.23	45547	1.08251	95.88	70.7836
1817	Langfang	2012	1	2	2	2	22.8072	2797.6	25170.3	0.71395	87.31	59.1554
1818	Hengshui	2012	0	2	2	2	32.8286	1848.72	18449.6	1.81635	80.35	65.8812
1819	Taiyuan	2012	1	2	1	3	30.4636	1926.31	29476.5	0.780029	84.5	109.493
1820	Datong	2012	0	2	2	3	23.9782	753.7	20686	1.20219	83.98	55.5867
1821	Yangquan	2012	1	2	2	2	27.3322	1076.84	26873.1	1.25397	90	74.4587
1822	Changzhi	2012	0	2	2	2	48.4066	2116.77	19978.4	1.07402	90.53	106.393
1823	Jincheng	2012	1	2	2	1	21.8326	2530.07	20416.8	0.771917	95	59.2818
1824	Shuozhou	2012	0	2	2	2	9.65762	174.58	93767.2	1.86613	100	37.6011
1825	Jinzhong	2012	0	2	2	2	34.5953	456.37	14906	0.789586	92.8	55.1661
1826	Yuncheng	2012	0	2	2	2	31.2059	565.68	11429.6	0.554388	98.8	35.6041
1827	Xinzhou	2012	0	2	2	2	42.7867	278.46	9157.8	0.759515	45.66	39.058
1828	Linfen	2012	0	2	2	2	18.8495	612.16	12579	0.678789	81.12	28.0149
1829	Lvliang	2012	0	2	2	1	21.0318	212.7	13429.3	1.22659	69	32.1053
1830	Huhehaote	2012	1	2	1	3	22.455	590.85	29978.9	0.365918	79.23	112.443
1831	Baotou	2012	1	1	1	3	25.0984	489.58	46673.7	1.11287	84.3	169.552
1832	Wuhai	2012	0	1	2	2	11.7016	312.66	36369.1	2.85909	92.6	42.3175
1833	Chifeng	2012	0	2	2	3	43.3468	174.18	17498.7	1.69929	90	84.0633
1834	Tongliao	2012	0	2	2	2	90.8832	264.04	22479.1	2.15245	95.81	247.642
1835	E'erduosi	2012	1	1	2	1	8.10221	103.99	49779.4	0.657314	93.22	92.2814
1836	Hulunbei'er	2012	0	2	2	1	29.7859	191.46	30189.6	1.1034	84.5	89.4203
1837	Bayanzhuo'er	2012	0	1	2	2	23.6296	238.62	15372.7	1.66114	62	35.3915
1838	Wulanchabu	2012	0	1	2	1	78.9155	2820.18	16159	1.24878	52	127.329
1839	Shenyang	2012	0	2	1	3	25.1492	1504.24	35440	0.994521	87.11	108.487
1840	Anshan	2012	1	2	2	3	61.7889	1917.68	32640.4	1.11111	80	201.804
1841	Fushun	2012	0	3	2	3	56.9577	1017.73	26974.9	1.66694	70.19	157.127
1842	Benxi	2012	1	3	2	2	73.9042	620.49	28926.9	1.81239	81.02	264.989
1843	Dandong	2012	0	3	2	2	39.5822	835.49	18143.7	0.907123	80.28	67.5573
1844	Jinzhou	2012	0	2	2	2	55.6852	2150.92	26276.6	1.17359	69.2	149.318
1845	Yingkou	2012	0	2	2	2	20.5448	1302.71	32115.2	1.42178	67.74	75.1913
1846	Fuxin	2012	0	2	2	2	65.015	1588.98	14582.6	1.73415	55.49	102.657
1847	Liaoyang	2012	1	2	2	2	58.1827	815.09	26416.8	1.40252	85.5	153.75
1848	Tieling	2012	0	2	2	1	29.1891	669.35	27229.7	2.10086	100	79.9093
1849	Chaoyang	2012	0	2	2	2	55.1344	534.01	15401.4	1.05958	76.45	90.5099
1850	Huludao	2012	0	2	2	2	49.0824	428.07	15824.4	1.62207	89.5	74.7411
1851	Changchun	2012	1	2	1	3	28.5026	757.95	35654.2	1.39242	83.78	96.2837
1852	Jilin	2012	0	3	1	3	43.6154	501.38	29499.2	1.13676	94	128.662
1853	Siping	2012	1	2	2	2	35.5534	560.56	17878.6	1.73418	75.02	63.5323
1854	Liaoyuan	2012	1	2	2	1	27.0233	1070.59	28864.4	1.49331	84.86	78.055
1855	Tonghua	2012	0	3	2	1	31.4231	592.75	21411.2	1.95845	89.85	67.5339
1856	Baishan	2012	0	3	2	2	36.6686	221.59	20470.8	1.92518	53.15	75.6588
1857	Songyuan	2012	0	2	2	2	24.4092	446.87	34754.5	2.66894	93.01	85.2196
1858	Baicheng	2012	0	2	2	2	43.8324	200.16	11731.1	0.905991	60.21	52.2574
1859	Ha'erbin	2012	1	3	1	3	27.9988	665.2	29282.8	0.665303	91.6	81.9962
1860	Qiqiha'er	2012	0	2	2	3	30.2348	318.76	20347.8	0.965271	68	59.1157
1861	Jixi	2012	0	3	2	2	84.559	371.74	10765.1	1.78667	50	91.9766
1862	Hegang	2012	0	3	2	2	51.5868	147.86	15152	2.64895	49	78.1278
1863	Shuangyashan	2012	0	3	2	1	29.8227	282.9	17027.1	1.97685	79	50.9839
1864	Daqing	2012	1	2	1	3	14.9467	264.07	120776	5.51945	92.5	180.867
1865	Yichun	2012	0	3	2	2	63.6808	41.19	9547.79	1.17727	85	60.2109
1866	Jiamusi	2012	0	3	2	2	50.5961	430.93	18692.7	0.633045	87.96	95.0495
1867	Qitaihe	2012	0	3	2	2	50.1322	156.56	18651.4	1.92344	85.2	93.4851
1868	Mudanjiang	2012	0	3	2	2	162.383	375.89	14377	0.961491	60.09	256.043
1869	Heihe	2012	0	3	2	1	50.4062	13.11	9475.22	0.622752	72.6	31.3757
1870	Suihua	2012	0	2	2	2	54.6587	321.48	8381.02	0.39191	99.32	28.2167
1871	Shanghai	2012	1	3	1	3	30.2701	2635.09	44625.7	0.638175	84.42	227.992
1872	Nanjing	2012	1	3	1	3	43.0869	1169.11	38569.6	0.76844	62.7	219.413
1873	Wuxi	2012	0	3	1	3	26.3186	1467.32	47997.6	1.0358	85.9	187.71
1874	Xuzhou	2012	1	2	1	3	21.0414	1056.16	33514.7	1.27109	84.3	68.6476
1875	Changzhou	2012	0	3	1	3	20.8248	1237.76	39258.9	1.22897	84.5	118.941
1876	Suzhou	2012	0	3	1	3	30.1985	736.49	48635.4	1.16952	73.8	241.869
1877	Nantong	2012	1	3	1	3	27.1578	1393.03	33138.7	1.18065	84.1	98.1737
1878	Lianyungang	2012	0	2	2	2	41.0979	805.42	22462.5	1.16468	68	104.436
1879	huai'an	2012	0	2	1	3	37.6829	909.42	19280.2	1.18364	72	68.0941
1880	Yancheng	2012	0	2	2	3	19.6693	895.81	23108.7	1.93846	67.6	43.9329
1881	Yangzhou	2012	0	3	1	3	19.8046	978.86	35214.4	1.32488	83.6	73.0943
1882	Zhenjiang	2012	0	3	2	3	32.0699	954.71	127809	1.15193	76.9	155.818
1883	Taizhou	2012	1	2	2	2	21.7519	1300.94	36639.1	1.57795	58.5	84.4898
1884	Suqian	2012	0	2	2	3	25.4948	779.84	16334.5	1.38984	76.3	37.1533
1885	Hangzhou	2012	0	3	1	3	19.322	1451.86	47832.3	0.780236	93.37	130.629
1886	Ningbo	2012	0	3	1	3	24.1932	918.4	54595.9	1.11491	75.36	204.887
1887	Jiaxing	2012	0	3	2	2	27.8298	876.45	28631.9	1.04275	87.28	113.373
1888	Huzhou	2012	0	3	2	3	24.5543	700.13	27861.3	1.31167	90.51	80.958
1889	Shaoxing	2012	0	3	2	2	41.0429	1813.81	43866	0.788033	84.82	179.224
1890	Jinhua	2012	0	3	2	2	27.6909	458.37	23011.1	0.867475	83.6	73.3759
1891	Quzhou	2012	0	3	2	2	24.9497	353.06	23499.1	1.20902	74.73	58.6643
1892	Zhoushan	2012	1	3	2	2	14.5953	680.37	42996.6	0.928275	59.57	62.571
1893	Lishui	2012	0	3	2	1	36.9478	261.52	24603.1	0.86656	74.18	105.776
1894	Hefei	2012	1	2	1	3	29.9933	2401.84	31798.3	1.17903	86.59	155.594
1895	Wuhu	2012	0	3	2	3	35.2384	1158.22	37727.1	2.08294	91.98	133.29
1896	Bengbu	2012	0	2	2	2	75.9547	1518.11	20437.8	1.5246	89.51	154.876
1897	Huainan	2012	0	3	2	3	39.9087	1063.2	13137.2	1.97309	77.43	52.7769
1898	Ma'anshan	2012	0	3	2	2	52.2326	1165.48	40398.2	2.27146	84.91	216.382
1899	Huaibei	2012	1	2	2	3	30.1846	1459.61	18130.8	2.67505	89.59	51.569
1900	Tongling	2012	1	3	2	1	32.6756	1543.45	45072.2	2.87715	81.08	158.75
1901	Anqing	2012	0	3	2	2	63.636	892.33	18896.5	1.11641	90.47	128.745
1902	Huangshan	2012	0	3	2	1	42.8238	187.02	18762.6	0.934995	88.09	80.4566
1903	Chuzhou	2012	0	3	2	2	48.3037	385.54	18087.6	2.03534	81.02	91.8115
1904	Fuyang	2012	0	2	2	3	47.7024	1133.07	6677.24	0.927957	84.74	31.5972
1905	Suzhou	2012	0	2	2	3	34.1139	655.82	7763.83	1.24652	56.75	28.7081
1906	Lu'an	2012	0	2	2	3	43.6049	522.13	5584.37	1.04109	89.82	24.1796
1907	Bozhou	2012	0	2	2	3	28.1751	744.38	7259.13	1.23764	88.58	17.7127
1908	Chizhou	2012	0	3	2	2	27.6098	275.95	13718.2	1.47528	89.72	37.7794
1909	Yicheng	2012	0	3	2	2	27.7548	330.22	9447.82	0.92263	71.89	26.2125
1910	Fuzhou	2012	0	3	1	3	34.6216	1075.36	29297.4	0.580471	92.53	157.033
1911	Xiamen	2012	0	3	1	3	30.3294	1213.73	32363.5	0.969005	90.7	187.161
1912	Putian	2012	1	3	2	3	36.7006	958.21	21235.4	1.92702	83	69.8724
1913	Sanming	2012	0	3	2	1	56.9579	239.05	32539.1	1.25952	80.6	247.837
1914	Quanzhou	2012	1	3	2	3	32.9661	1193.33	30648.1	1.43468	83	142.447
1915	Zhangzhou	2012	0	3	2	2	22.369	1413.72	27753.5	1.04571	81.78	80.4762
1916	Nanping	2012	0	3	2	1	27.3085	186.92	20132.6	1.6645	78.52	51.8712
1917	Longyan	2012	0	3	2	1	30.5009	183.84	33420.2	2.17756	75.75	140.57
1918	Ningde	2012	0	3	2	1	16.5714	299.09	17608.5	0.819996	80.6	27.6957
1919	Nanchang	2012	1	3	1	3	43.8857	3649.27	32040	1.05332	94.6	174.942
1920	Jingdezhen	2012	1	3	2	1	26.7309	797.93	31438.9	1.55735	69.56	86.9978
1921	Pingxiang	2012	1	3	2	2	21.3573	812.06	32731.6	1.86389	79.1	49.1369
1922	Jiujiang	2012	0	3	2	2	29.1078	1086.29	36902.2	1.00304	97.24	118.123
1923	Xinyu	2012	0	3	2	2	18.7337	487.81	34738.9	2.04644	96.78	63.551
1924	Yingtan	2012	0	3	2	1	32.9818	1708.09	27469.9	1.04141	86.1	84.4397
1925	Ganzhou	2012	0	3	2	2	40.2061	1118.49	19922.3	1.34475	38.97	90.1531
1926	Ji'an	2012	0	3	2	2	42.6214	401.52	10878.5	1.1234	75.84	50.5766
1927	Yichun	2012	0	3	2	3	54.3844	427.05	6779.56	0.878513	98.51	35.9852
1928	Fuzhou	2012	0	3	2	3	43.9133	559.94	10261.3	1.98001	92.45	41.7003
1929	Shangrao	2012	0	3	2	1	55.8005	1104.86	16233.6	0.757875	90.3	93.154
1930	Ji'nan	2012	0	2	1	3	20.656	1081.27	36497.5	0.56624	89.83	94.4066
1931	Qingdao	2012	0	2	1	3	18.5745	1105.07	57830.5	0.949397	91.34	107.021
1932	Zibo	2012	1	2	1	3	21.7888	939.95	44000.1	1.51129	96.2	95.8327
1933	Zaozhuang	2012	0	2	2	3	23.589	735.61	18034.1	2.01965	92.76	40.3676
1934	Dongying	2012	0	2	1	2	11.4795	253.64	80803.8	2.95351	93.69	115.048
1935	Yantai	2012	0	2	1	3	14.9541	662.27	58524.8	1.39217	96.19	87.3489
1936	Weifang	2012	0	2	2	3	31.7821	709.46	22930.3	1.38133	75	82.3497
1937	Ji'ning	2012	0	2	2	3	32.6404	1175.17	28078.7	1.5205	93.06	100.816
1938	Tai'an	2012	0	2	2	3	20.4969	761.48	17890.1	0.911374	92.85	41.5104
1939	Weihai	2012	0	2	2	2	24.2374	843.89	40251	1.34293	96.22	97.2256
1940	Rizhao	2012	0	2	2	3	14.7915	672.95	36934.4	1.91339	92.98	52.5058
1941	Laiwu	2012	0	2	2	3	16.2022	562.33	21362.6	1.64505	91.23	35.8907
1942	Linyi	2012	0	2	1	3	30.4897	1084.13	20568.2	1.37652	93.63	66.6895
1943	Dezhou	2012	1	2	2	2	12.9154	1128.76	34560.8	1.28605	87.8	44.5559
1944	Liaocheng	2012	0	2	2	3	33.8764	797.92	14362.6	1.35837	91.17	49.0617
1945	Binzhou	2012	1	2	2	2	37.3531	620.56	26968.3	1.14311	93.86	107.245
1946	Heze	2012	0	2	2	3	24.3504	1063.32	12447.1	0.887143	80.52	27.2824
1947	Zhengzhou	2012	1	2	1	3	28.7813	5813.86	28264.6	0.808174	95.82	61.0082
1948	Kaifeng	2012	0	2	2	2	74.1536	2393.92	13493.1	0.756661	88	103.449
1949	Luoyang	2012	1	2	2	3	34.8836	3612.13	22529.8	1.14004	99.57	83.2417
1950	Pingdingshan	2012	1	2	2	3	54.738	2348.53	19125.2	2.01102	93.16	104.894
1951	Anyang	2012	1	2	2	3	30.14	2075.47	14765.3	1.14821	94.89	47.6715
1952	Hebi	2012	0	2	2	2	37.6381	905.74	19053.1	3.2211	85.61	75.4146
1953	Xinxiang	2012	0	2	2	3	33.3167	2929.26	21285	0.990285	85.88	72.6576
1954	Jiaozuo	2012	0	2	2	2	51.6294	2270.99	16480.2	1.25708	86.1	80.945
1955	Puyang	2012	0	2	2	2	33.8493	2410.38	22279.7	2.9837	86	71.9369
1956	Xuchang	2012	0	2	2	1	37.1026	4285.57	23879.1	2.34253	96.96	106.923
1957	Luohe	2012	0	2	2	3	12.8021	1370.2	16069.4	2.73514	90	19.1345
1958	Sanmengxia	2012	0	2	2	1	28.6461	1616.76	19736.1	1.15154	96.55	61.0368
1959	Nanyang	2012	0	2	2	3	37.7197	909.65	13303.6	1.08674	65.13	46.9619
1960	Shangqiu	2012	0	2	2	3	31.0577	1067.35	7550.66	1.4649	73.92	21.2811
1961	Xinyang	2012	0	2	2	3	24.0154	413.43	12325.3	1.33212	47.99	25.2752
1962	Zhoukou	2012	0	2	2	2	45.406	1734.62	9212.89	1.11977	86	50.2389
1963	Zhumadian	2012	0	2	2	2	47.6615	596.78	11690.5	1.46221	80.14	59.0798
1964	Wuhan	2012	1	3	1	3	45.4669	1887.38	38946.8	0.868207	92.3	236.943
1965	Huangshi	2012	0	3	2	2	39.1842	3021.94	26879.1	1.97539	85.1	116.76
1966	Shiyan	2012	0	3	2	2	41.0074	452.14	30257.9	1.63484	88.01	180.872
1967	Yichang	2012	1	3	2	3	23.1568	295.01	33149.8	2.35994	88.5	88.4038
1968	Xiangfan	2012	1	3	1	3	29.9154	614.92	23844.9	1.82207	87.44	71.2046
1969	Ezhou	2012	1	3	2	3	28.8633	686.07	21928.4	2.17421	90.5	60.9506
1970	Jingmen	2012	1	3	2	2	52.2102	295.78	23182.4	1.6888	85.35	113.692
1971	Xiaogang	2012	0	3	2	2	42.2518	938.24	8578.91	1.12234	90	36.2278
1972	Jingzhou	2012	0	3	2	3	44.5934	716.69	14062.2	1.56921	81.03	67.1858
1973	Huanggang	2012	0	3	2	1	70.3091	983.98	16266.5	1.14511	46.01	114.213
1974	Xianning	2012	0	3	2	2	38.5952	408.34	14751.1	1.52159	87	47.423
1975	Suizhou	2012	0	3	2	1	33.7244	342.36	18563.6	1.16507	93.48	82.9139
1976	Changsha	2012	1	3	1	3	24.6821	1559.69	46444.9	0.894696	95	140.977
1977	Zhuzhou	2012	1	3	2	2	46.6093	1106.02	31352.5	1.82875	82.53	180.22
1978	Xiangtan	2012	1	3	2	2	35.7855	1348.94	30954.7	1.95204	85.9	131.543
1979	Hengyang	2012	0	3	2	2	103.685	1443.7	20853.4	1.56071	70	246.683
1980	Shaoyang	2012	0	3	2	2	81.8095	1585.09	11605.1	1.24428	52	104.052
1981	Yueyang	2012	1	3	2	3	53.8038	893.34	31889.9	1.45154	86.7	191.968
1982	Changde	2012	0	3	2	3	19.1201	558.21	31056.8	1.49141	81.68	55.8458
1983	Zhangjiajie	2012	0	3	2	2	33.1968	189.95	14386.7	0.265125	78.37	46.3077
1984	Yiyang	2012	0	3	2	3	23.9091	728.69	14086.4	1.72398	91.69	31.023
1985	Chenzhou	2012	0	3	2	2	38.7845	326.25	21997.9	1.14773	80.96	97.0396
1986	Yongzhou	2012	0	3	2	3	72.0756	364.35	12532.3	1.14141	67.12	80.2416
1987	Huaihua	2012	0	3	2	1	50.9025	552.25	16695	0.484238	83.1	128.397
1988	Loudi	2012	0	3	2	1	36.443	1106.07	24602.3	1.89808	85.03	94.7569
1989	Guangzhou	2012	0	3	1	3	32.6439	1764.17	52594.5	0.49803	82.73	282.348
1990	Shaoguan	2012	0	3	2	2	31.3147	320.77	21116.2	0.815815	81.54	72.0195
1991	Shenzhen	2012	1	3	1	3	26.2998	1440.26	58029.4	0.796226	94.84	557.58
1992	Zhuhai	2012	0	3	1	3	47.7791	618.04	44951.4	1.12779	87.78	317.345
1993	Shantou	2012	0	3	1	3	42.9865	2686.25	12381.6	1.22285	69.53	54.4195
1994	Foshan	2012	0	3	1	3	17.9377	994.34	42968.2	1.73598	92.13	147.874
1995	Jiangmen	2012	0	3	2	3	40.4122	764.47	26008.2	1.85821	88.1	142.23
1996	Zhanjiang	2012	0	3	2	3	26.8421	949.36	26813.3	1.05723	67.72	73.0251
1997	Maoming	2012	0	3	2	3	16.9856	1515.91	24251.5	1.25849	85.78	37.9077
1998	Zhaoqing	2012	0	3	2	2	47.292	683.69	33533.6	1.41019	80.27	209.399
1999	Huizhou	2012	0	3	1	3	34.0235	512.51	27204.1	1.95585	91.01	180.659
[truncated: 1,413 more rows]

## Sheet: Table S2. variable definition
id	city	year	y	rank1	rank2	rank3	S	x1	x2	x3	x4	x5
			whether the city implements the water-saving society policy or not	cities with different water resources endowments	cities with different economic development	cities of different sizes	water consumption per CNY 10 000 GDP	population density	GDP per capita	ratio of the secondary industry output to the tertiary industry output	centralized treatment rate of urban sewage	water supply per capita
			0=no; 1=yes	1=Cities in arid areas; 2=Cities in subhumid or arid areas; 3=Cities in humid areas	1=Cities with high economic development; 2=Cities with low economic development	1=Small cities; 2=Medium sized cities; 3=Big cities
